# Mathematical modeling of N-803 treatment in SIV-infected non-human primates

Jonathan W. Cody<sup>1</sup>, Amy L. Ellis-Connell<sup>2</sup>, Shelby L. O'Connor<sup>2</sup>, Elsje Pienaar<sup>1\*</sup>

<sup>1</sup> Weldon School of Biomedical Engineering, Purdue University, West Lafayette, Indiana, United States of America

<sup>2</sup> Department of Pathology and Laboratory Medicine, University of Wisconsin-Madison, Madison, Wisconsin, United States of America

\* Corresponding author

E-mail: [epienaar@purdue.edu](mailto:epienaar@purdue.edu)

## Abstract

Immunomodulatory drugs could contribute to a functional cure for Human Immunodeficiency Virus (HIV). Interleukin-15 (IL-15) promotes expansion and activation of CD8<sup>+</sup> T cell and natural killer (NK) cell populations. In one study, an IL-15 superagonist, N-803, suppressed Simian Immunodeficiency Virus (SIV) in non-human primates (NHPs) who had received prior SIV vaccination. However, viral suppression attenuated with continued N-803 treatment, partially returning after long treatment interruption. While there is evidence of concurrent drug tolerance, immune regulation, and viral escape, the relative contributions of these mechanisms to the observed viral dynamics have not been quantified. Here, we utilize mathematical models of N-803 treatment in SIV-infected macaques to estimate contributions of these three key mechanisms to treatment outcomes: 1) drug tolerance, 2) immune regulation, and 3) viral escape. We calibrated our model to viral and lymphocyte responses from the above-mentioned NHP study. Our models track CD8<sup>+</sup> T cell and NK cell populations with N-803-dependent proliferation and activation, as well as viral dynamics in response to these immune cell populations. We compared mathematical models with different combinations of the three key mechanisms based on Akaike Information Criterion and important qualitative features of the NHP data. Two minimal models were capable of reproducing the observed SIV response to N-803. In both models, immune regulation strongly reduced cytotoxic cell activation to enable viral rebound. Either long-term drug tolerance or viral escape (or some combination thereof) could account for changes to viral dynamics across long breaks in N-803 treatment. Theoretical explorations with the models showed that less-frequent N-803 dosing and concurrent immune regulation blockade (e.g. PD-L1 inhibition) may improve N-803 efficacy. However, N-803 may need to be combined with other immune therapies to countermand viral escape from the CD8<sup>+</sup> T cell response. Our mechanistic model will inform such therapy design and guide future studies.

## Author summary

Immune therapy may be a critical component in the functional cure for Human Immunodeficiency Virus (HIV). N-803 is an immunotherapeutic drug that activates antigen-specific CD8<sup>+</sup> T cells of the immune system. These CD8<sup>+</sup> T cells eliminate HIV-infected cells in order to limit the spread of infection in the body. In one study, N-803 reduced plasma viremia in macaques that were infected with Simian Immunodeficiency Virus, an analog of HIV. Here, we used mathematical models to analyze the data from this study to better understand the effects of N-803 therapy on the immune system. Our models indicated that inhibitory signals may be reversing the stimulatory

effect of N-803. Results also suggested the possibilities that tolerance to N-803 could build up within the CD8<sup>+</sup> T cells themselves and that the treatment may be selecting for virus strains that are not targeted by CD8<sup>+</sup> T cells. Our models predict that N-803 therapy may be made more effective if the time between doses is increased or if inhibitory signals are blocked by an additional drug. Also, N-803 may need to be combined with other immune therapies to target virus that would otherwise evade CD8<sup>+</sup> T cells.

## Introduction

In 2019, there was an estimated 38.0 million people living with Human Immunodeficiency Virus (HIV) and 690,000 deaths related to Acquired Immune Deficiency Syndrome (AIDS) [1]. Current antiretroviral therapy (ART) remains a life-long therapy, since treatment interruption inevitably leads to viral rebound [2]. Alternative treatment strategies include reversing latent infections [3], introducing cellular and humoral vaccines [4], enhancing T cell function [5], and enhancing NK cell function [6]. These immune-based approaches could reduce the reliance on continuous and lifelong ART and contribute to a functional HIV cure.

One immunotherapeutic approach involves interleukin-15 (IL-15). Interleukin-15 is a cytokine that induces proliferation and activation of CD8<sup>+</sup> T cells and natural killer (NK) cells (reviewed in [7, 8]). Although treatment with monomeric IL-15 did not lower plasma viral load in non-human primates (NHPs) infected with Simian Immunodeficiency Virus (SIV) [9, 10], treatment with the heterodimeric IL-15/IL-15R $\alpha$  complex did reduce viral load in plasma and lymph tissue of NHPs infected with Simian/Human Immunodeficiency Virus (SHIV) [11]. N-803 [ImmunityBio] (formerly ALT-803 [Altor Biosciences]) is an IL-15 superagonist that combines an IL-15 variant with improved bioactivity [12] with an IL-15R $\alpha$ -Fc complex to extend serum half-life and bioavailability [13]. This superagonist induced proliferation of CD8<sup>+</sup> T cells and NK cells in healthy NHPs [14, 15], SIV-infected NHPs [15, 16], and in humans participating in cancer trials [17-19]. In one NHP study, N-803 treatment reduced the number of SIV-infected cells in B-cell follicles but did not consistently lower plasma viral load [15]. In a different cohort of NHPs genetically predisposed to SIV control and vaccinated prior to infection, weekly doses of N-803 successfully lowered SIV viral load in the plasma, though the effect was transient [16]. After initially being suppressed, the viral load partially rebounded during the first month of weekly doses. However, after a 29-week break in treatment, N-803 regained partial efficacy in reducing plasma viral load. Thus, there were variations in treatment efficacy along both short (weeks) and long (months) timescales. While this is only one study, these dynamic responses provide a unique opportunity to quantify transient

treatment responses and suggest that changes in treatment scheduling of N-803 could improve efficacy in reducing SIV viral load. However, such optimization would require an understanding of the underlying mechanisms driving the observed loss and recovery of treatment efficacy.

The vaccinated NHP study identified several mechanisms which could have compromised the efficacy of N-803 [16]. We broadly consider these mechanisms in three categories (Table 1). The first mechanism, drug tolerance, was evidenced by the decline of IL-15 receptor expression by CD8<sup>+</sup> T cells and NK cells during N-803 treatment, thereby reducing the available targets for N-803. The second mechanism we term immune regulation. Expression of inhibitory markers (CD39 and PD-1) by CD8<sup>+</sup> T cells and NK cells increased, as did the presence of regulatory T cells (CD4<sup>+</sup>CD25<sup>+</sup>CD39<sup>+</sup> phenotype) in the peripheral blood. In other studies, N-803 increased serum levels of the anti-inflammatory cytokine IL-10 in mice [20], and, in a mouse model of cerebral malaria, N-803 induced NK cells to secrete IL-10, which decreased CD8<sup>+</sup> T cell activation in the brain [21]. Together, these data indicate that there may be a systemic anti-inflammatory response that could hamper the ability of N-803 to stimulate prolonged anti-viral immune responses. In this work we broadly group these anti-inflammatory responses under the term immune regulation. Third, the amino acid sequence of targeted CD8<sup>+</sup> T cell epitopes was altered during N-803 treatment, which could be consistent with viral escape [16]. As a result, previously generated CD8<sup>+</sup> T cells may not recognize circulating viral variants [22-24]. While evidence of all three of these mechanisms exists in the NHP data, the contributions of each mechanism to the loss and recovery of viral suppression under N-803 therapy have not been quantitatively assessed, a task that is difficult to do experimentally.

**Table 1. Mechanisms considered to compromise N-803 efficacy.**

|                          |                                                                                                                                                      |
|--------------------------|------------------------------------------------------------------------------------------------------------------------------------------------------|
| <b>Drug Tolerance</b>    | Factors which act only to diminish the stimulatory effect of N-803 on CD8 <sup>+</sup> T cells and NK cells (e.g. downregulation of IL-15 receptors) |
| <b>Immune Regulation</b> | Factors which act to inhibit the immune response of CD8 <sup>+</sup> T cells and NK cells (e.g. upregulation of immune checkpoint molecules)         |
| <b>Viral Escape</b>      | Selection of SIV variants that evade the CD8 <sup>+</sup> T cell immune response                                                                     |

Computational models are well-suited to quantify and deconvolute the effects of multiple interacting mechanisms in complex systems. Ordinary differential equation (ODE) models have been used to study HIV and its treatment (reviewed in [25, 26]). ODE models have investigated the potential of various treatment strategies, including reactivating latent infections [27, 28],

cytotoxic cell stimulation [27], and cellular vaccines [29]. Modelers have also explored how immune regulation [30, 31] and viral escape [29, 32] affect cytotoxic cell function and HIV infection.

Here we combine, for the first time, pharmacokinetics and pharmacodynamics of N-803 with an HIV infection model that includes both cytotoxic T-cell and NK cell populations. We also newly combine this model with mechanisms which may lower N-803 efficacy. These mechanisms are: drug tolerance that weakens the N-803 effect in cytotoxic cells; immune regulatory signals that inhibit cytotoxic cell function; and viral escape from cytotoxic cell targeting. We calibrated the model to data from one vaccinated NHP study, specifically to longitudinal viral, CD8<sup>+</sup> T cell, and NK cell measurements from the peripheral blood [16]. We applied the model to quantify how drug tolerance, immune regulation, and viral escape may have contributed to the dynamics of SIV viremia during N-803 treatment in this unique set of NHPs. We also predicted how these mechanisms might impact potential improvements to N-803 regimens.

## Methods

### Mathematical model

**Viral infection.** We followed the practice of representing the within-host dynamics of viral infection with a system of ordinary differential equations [25-32]. Equations (1-4) describe the model of viral infection and immune response in the absence of N-803 treatment. This is a single-compartment model that does not explicitly consider migration between blood, lymph, and peripheral tissues. The disease model is graphically summarized in Fig 1A. Table 2 lists the dependent variables of the model.

**Table 2. Model variables.**

|                        | Variable                                     | Symbol              | Units      |
|------------------------|----------------------------------------------|---------------------|------------|
| <b>Infection model</b> | Cell infected with SIV variant $V$           | $I_V$               | #/ $\mu$ L |
|                        | Cell infected with SIV escape variant $W$    | $I_W$               | #/ $\mu$ L |
|                        | CD8 <sup>+</sup> T cells in peripheral blood | $E$                 | #/ $\mu$ L |
|                        | Natural killer cells in peripheral blood     | $K$                 | #/ $\mu$ L |
| <b>Treatment model</b> | N-803 at absorption site                     | $X$                 | pmol/kg    |
|                        | N-803 in plasma                              | $C$                 | pM         |
|                        | Tolerance variables                          | $TOL_1 \dots TOL_N$ | -          |
|                        | Regulation variables                         | $REG_1 \dots REG_M$ | -          |

Dependent variables from Eq. (1-14) and Fig 1, shown with their corresponding symbol and units.

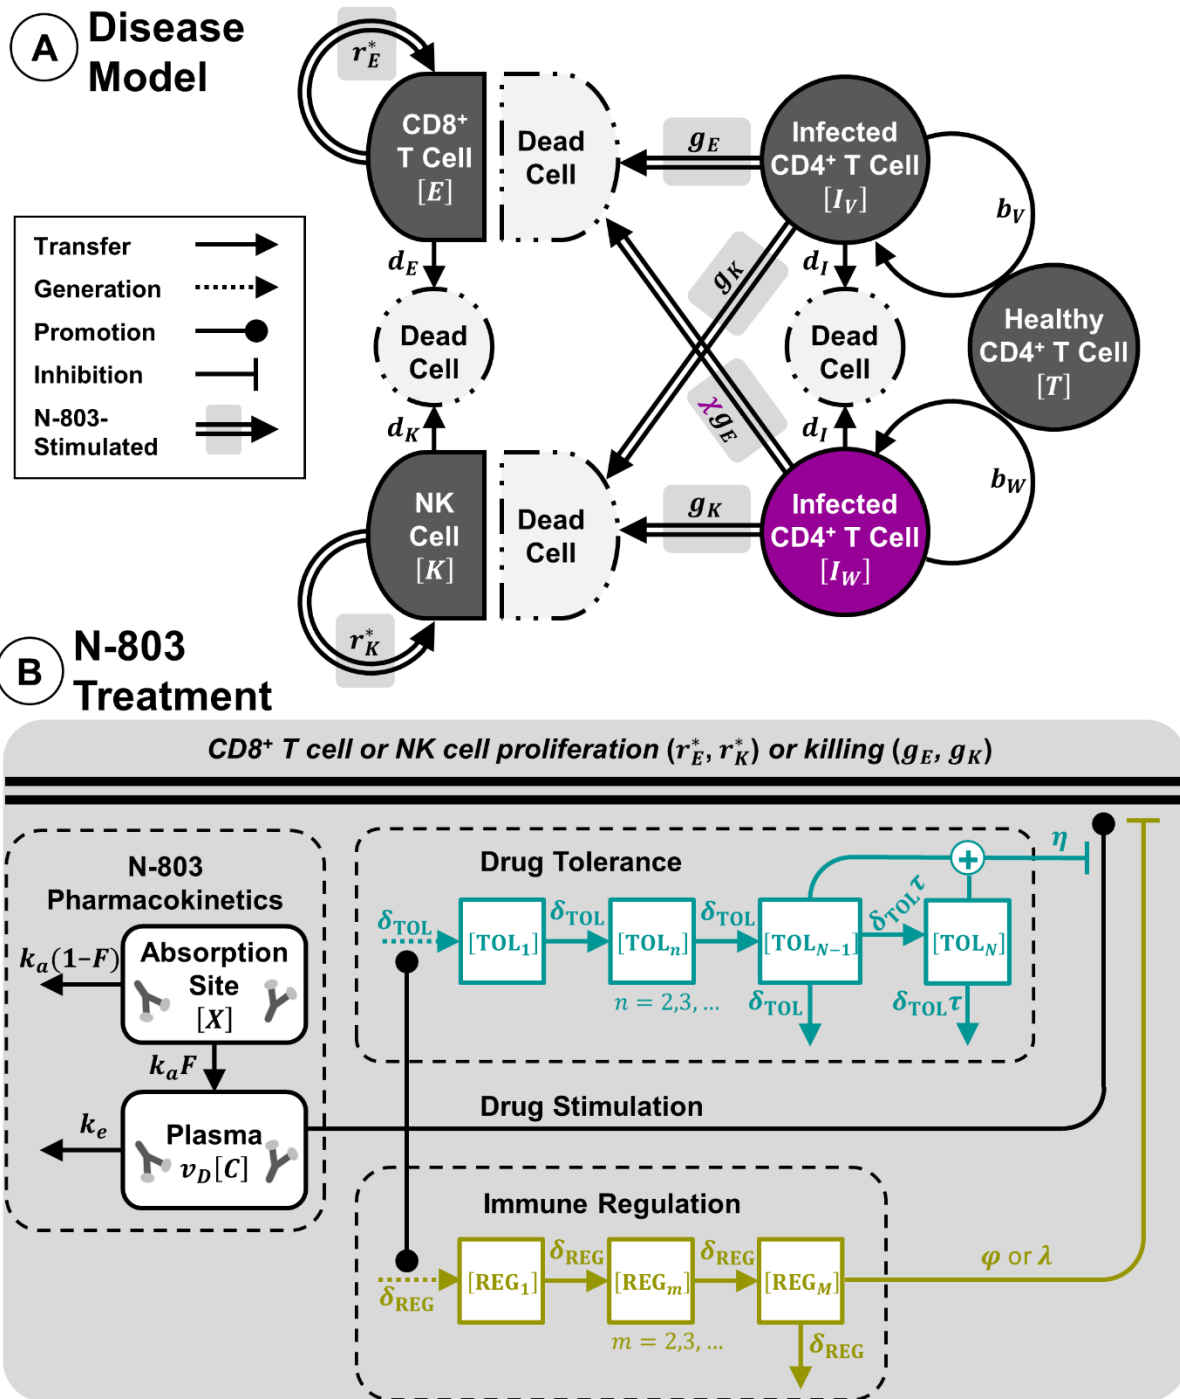

**Fig 1. Mathematical model of N-803 treatment of SIV.** (A) SIV disease model includes cells infected with one of two variants of SIV virus ( $I_V$  and  $I_W$ ), along with CD8<sup>+</sup> T cells ( $E$ ) and NK cells ( $K$ ) (Eq. 1-4). Proliferation rate constants  $r_E^*$  and  $r_K^*$  for CD8<sup>+</sup> T cells and NK cells are modified by density-dependent terms (not shown, see Eq. 3,4). (B) N-803 treatment model includes pharmacokinetics at absorption site and plasma compartments (Eq. 5,6). N-803 stimulates proliferation and cytotoxicity of CD8<sup>+</sup> T cells and NK cells, where drug effect is inhibited by tolerance (Eq. 7-12). Immune regulation inhibits proliferation and cytotoxicity of cells (Eq. 7,8,13,14). Double lines indicate the sum of drug-induced and constitutive rates.

The dynamics of cells infected by SIV are represented by Eq. (1).

$$I_V' = b_V T I_V - d_I I_V - g_E E I_V - g_K K I_V \quad (1)$$

Infected cells,  $I_V$ , infect healthy CD4<sup>+</sup> T cells,  $T$ , with rate constant  $b_V$ . This infection represents both cell-free and cell-to-cell transmission. Infected cells die with rate constant  $d_I$ . Healthy CD4<sup>+</sup> T cells are assumed to be constant, and free virions are assumed to be proportional to infected cells (assumptions are discussed in Appendix S1). The latter assumption is common in HIV models [29, 32-34] and reduces model complexity while still allowing calibration to experimentally measured fold changes in viral load. CD8<sup>+</sup> T cells,  $E$ , and NK cells,  $K$ , kill infected cells with second-order rate constants  $g_E$  and  $g_K$ , respectively. Killing rate constants ( $g_E$  and  $g_K$ ) are applied to the total populations of CD8<sup>+</sup> T cells and NK cells (see Appendix S1). Changes in the frequency of cytotoxicity active cells within these two groups are represented by modifications to these average killing rates (see next subsection, 'N-803 treatment'). The latent viral reservoir is an important contributor to viral rebound following ART interruption [35, 36]. However, the role of the latent reservoir in the response during and after immunotherapy alone remains unclear [15, 37]. Given this uncertainty, the fact that our experimental data indicate relatively short periods of viral suppression [16], and the parameters an explicit viral reservoir would add, this current model does not explicitly account for latent viral reservoir dynamics, following other models of HIV immune therapy [38-40]. When considering N-803 treatment in the context of ART and long-term suppressed viral load [41, 42], mathematical models should include a representation of the latent reservoir.

Viral escape from the CD8<sup>+</sup> T cell response is a phenomenon documented in both HIV and SIV [22-24]. Our data subjects included two animals with the *Mamu-B\*08* MHC class I allele which had received vaccination with *Mamu-B\*08* restricted viral epitopes [43]. Sequencing revealed changes in the amino acid composition of *Mamu-B\*08* restricted epitopes after N-803 treatment, changes which could have occurred during viral escape [16]. Viral escape was incorporated into the model by including two viral variants and no mutation between the variants (Eq, 2), following Asquith et. al. [44, 45].

$$I_W' = b_W T I_W - d_I I_W - \chi g_E E I_W - g_K K I_W \quad (2)$$

The cells infected with the escape variant,  $I_W$ , have reduced susceptibility to cytotoxic T cells (by applying a factor  $\chi < 1$  to the killing rate). This variant also infects target cells at a lower rate constant ( $b_W < b_V$ ), as escape can often incur a fitness penalty [46-48].



Both CD8<sup>+</sup> T cells [49, 50] and NK cell [51] populations are maintained by self-renewal (Eq. 3,4).

$$E' = r_E \left( \frac{h}{h+E} \right) E - d_E E \quad (3)$$

$$K' = r_K \left( \frac{h}{h+K} \right) K - d_K K \quad (4)$$

CD8<sup>+</sup> T cells and NK cells proliferate with rate constants  $r_E$  and  $r_K$  and undergo apoptosis with rate constants  $d_E$  and  $d_K$ , respectively. To maintain a stable population, proliferation and survival are thought to be density-dependent, which could arise from competition for space and cytokines [52]. Therefore, our proliferation rates are modified by density-dependent terms governed by  $h$  [27, 53]. Stimulation of CD8<sup>+</sup> T cells and NK cells via viral antigen is assumed to remain at a constant or saturated level. Thus, absent N-803 intervention, the immune response is constant, which is a common assumption [25, 26].

**N-803 treatment.** The pharmacokinetics for N-803 (Fig 1B, Eq. 5,6) follows the basic model for extravascular dosing [54].

$$X' = -k_a X \quad (5)$$

$$C' = k_a (F/v_d) X - k_e C \quad (6)$$

This describes the quantity of N-803 at the absorption site,  $X$ , and concentration of N-803 in the plasma,  $C$ . Parameters  $k_a$ ,  $k_e$ ,  $F$ , and  $v_d$  are the absorption rate constant, elimination rate constant, bioavailability, and volume of distribution, respectively.

N-803 has been demonstrated to expand CD8<sup>+</sup> T cells and NK cells in healthy NHPs [14, 15] SIV-infected NHPs [15, 16], and in humans participating in cancer trials [17-19]. N-803 also increased expression of cytolytic proteins perforin and granzyme B in human CD8<sup>+</sup> T cells [14] and NK cells in vitro [55, 56] and induced secretion of cytokines IFN $\gamma$  and TNF $\alpha$  in murine CD8<sup>+</sup> T cells and NK cells in vivo [20, 57, 58]. Therefore, we represented N-803 pharmacodynamics by applying a drug-dependent increase (Eq. 7,8, Fig 1B) to both the rates of killing and proliferation for CD8<sup>+</sup> T cells and NK cells (parameters  $g_E, g_K$  and  $r_E, r_K$  in Eq. 1-4).

$$g_i \rightarrow g_i \left[ \overbrace{1 + \gamma_i \left( \frac{C}{C_{50} + C} \right)}^{\text{Drug Effect}} \overbrace{\left( \frac{1}{1 + \eta (\text{TOL}_{N-1} + \text{TOL}_N)} \right)}^{\text{Drug Tolerance}} \right] \overbrace{\left( \frac{1}{1 + \lambda \text{REG}_M} \right)}^{\text{Immune Regulation}} \quad i = E, K \quad (7)$$



$$r_i \rightarrow r_i \left[ 1 + \rho_i \left( \frac{C}{C_{50} + C} \right) \left( \frac{1}{1 + \eta(\text{TOL}_{N-1} + \text{TOL}_N)} \right) \right] \left( \frac{1}{1 + \varphi \text{REG}_M} \right) \quad i = E, K \quad (8)$$

Effects saturate for both cell types according to a single parameter,  $C_{50}$  (Eq. 7,8). The parameters  $\gamma_E, \gamma_K$  and  $\rho_E, \rho_K$  ('Drug Effect' in Eq. 7,8) are the maximum relative increases in killing and proliferation rates, respectively. Parameters  $\eta$ ,  $\lambda$ , and  $\varphi$  determine the strength of inhibition due to drug tolerance and immune regulation, which are discussed in the following paragraphs.

In the N-803 treated NHPs, expression of the IL-15 receptor subunits, CD122 and CD132, declined in both CD8<sup>+</sup> T cells and NK cells with continued treatment, suggesting a possible tolerance to N-803 [16]. Furthermore, the proliferation of CD8<sup>+</sup> T cells and NK cells was weaker in the second and third treatment cycles compared to the first cycle [16]. We phenomenologically represented drug tolerance by adding a delayed inhibition to the drug effect ('Drug Tolerance' term in Eq. 7,8), the timing of which is modeled by Eq. (9-12).

$$\text{TOL}'_1 = \delta_{\text{TOL}} \left( \frac{C}{C_{50} + C} - \text{TOL}_1 \right) \quad (9)$$

$$\text{TOL}'_n = \delta_{\text{TOL}} (\text{TOL}_{n-1} - \text{TOL}_n) \quad n = 2, 3, \dots, N-2 \quad (10)$$

$$\text{TOL}'_{N-1} = \delta_{\text{TOL}} (\text{TOL}_{N-2} - (1 + \tau)\text{TOL}_{N-1}) \quad (11)$$

$$\text{TOL}'_N = \delta_{\text{TOL}} (\tau\text{TOL}_{N-1} - \tau\text{TOL}_N) \quad (12)$$

The build-up and decay of tolerance is governed by two parameters,  $\delta_{\text{TOL}}$  and  $\tau$ . The additional parameter  $\tau$  allows a portion of the drug tolerance to persist long-term and attenuate N-803 stimulation in the third cycle.

N-803 treatment of NHPs also coincided with increases in regulatory T cell counts (CD4<sup>+</sup>CD25<sup>+</sup>CD39<sup>+</sup> phenotype) in the peripheral blood and increases in expression of inhibitory markers CD39 in CD8<sup>+</sup> T cells and PD-1 in NK cells [16]. Other studies found that N-803 increased levels of IL-10 in mice, which decreased cytotoxic T cell activation [20, 21], though IL-10 was not collected along with the NHP data used in our study. Taken together, this implicates a number of regulatory mechanisms that could counteract the immune stimulatory impact of N-803. As with drug tolerance, we employed a single phenomenological representation of the effects of these immune regulatory pathways (i.e. regulatory T cells, IL-10, etc.), rather than mechanistically modeling each specific pathway (Eq. 13,14, Fig 1B).

$$\text{REG}'_1 = \delta_{\text{REG}} \left( \frac{C}{C_{50} + C} - \text{REG}_1 \right) \quad (13)$$

$$\text{REG}'_m = \delta_{\text{REG}} (\text{REG}_{m-1} - \text{REG}_m) \quad m = 2, 3, \dots, M \quad (14)$$

Like tolerance, the timing of the regulatory effect was modeled as a delay from the drug effect, this time according to a single parameter  $\delta_{\text{REG}}$ . Unlike long-term tolerance, incorporating long-term regulation did not improve model fit to data (see Appendix S1). For the sake of simplicity, it is therefore assumed that the regulatory signals do not persist across the long break in treatment. Immune regulation directly inhibits CD8<sup>+</sup> T cell and NK cell killing and proliferation, where the parameters  $\lambda$  and  $\varphi$  determine the strength of inhibition of killing and proliferation, respectively ('Immune regulation' in Eq. (7,8)). All of the parameters governing drug tolerance and immune regulation were assumed to be shared between CD8<sup>+</sup> T cells and NK cells. This was necessary to improve identifiability of those parameters and simplify analysis.

By assuming an approximately steady-state prior to treatment, some parameters were derived. Specifically, the collection of parameters governing cell infection and death ( $\beta_V, \beta_W, T, d_I$ ) were calculated from killing parameters ( $g_E, g_K, \chi$ ), and proliferation rates of cells ( $r_E, r_K$ ) were calculated from cytotoxic cell parameters ( $d_E, d_K, h$ ). The expressions for derived parameter values (Eq. 15-18) include initial conditions  $E_0$  and  $K_0$ .

$$\beta_V T - d_I := q_V = g_E E_0 + g_K K_0 \quad (15)$$

$$\beta_W T - d_I := q_W = \chi g_E E_0 + g_K K_0 \quad (16)$$

$$r_E = d_E (h + E_0) / h \quad (17)$$

$$r_K = d_K (h + K_0) / h \quad (18)$$

## Experimental data

Our mathematical models were calibrated to a single non-human primate study [16]. Three rhesus macaques, chronically infected with SIVmac239 for at least 1.5 years, were given weekly 0.1 mg/kg subcutaneous doses of N-803. The regimen (Fig 2) consisted of three cycles of four treatments each, with a 2-week break between the first and second cycles and a 29-week break between the second and third cycles. Assays to measure plasma viremia (quantified as SIVmac239 gag copy equivalents/mL plasma), as well as CD8<sup>+</sup> T cells and NK cells in the peripheral blood, were used as calibration data. We assume SIVmac239 gag copy equivalents in the plasma to be proportional to SIV virions in the peripheral blood. Additional quantities were

measured in the peripheral blood, which here served to inform the model. These include CD4<sup>+</sup> T cells, regulatory T cells (CD4<sup>+</sup>CD25<sup>+</sup>CD39<sup>+</sup> phenotype), CD39 expression in CD8<sup>+</sup> T cells, and ki-67, PD-1, CD122, and CD132 expression in CD8<sup>+</sup> T cells and NK cells. All animals had been vaccinated with SIV epitopes prior to infection and had previously demonstrated transient SIV control as part of a previous study [43].

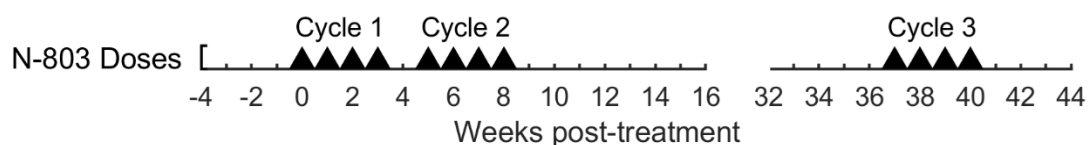

**Fig 2. Dosing schedule for N-803 treatment of SIV-infected NHPs.** Each triangle indicates a 0.1 mg/kg subcutaneous dose of N-803 [16].

### Parameter Estimation

Maximum likelihood estimation was used to fit model outputs to plasma viral load, CD8<sup>+</sup> T cell peripheral blood count, and NK cell peripheral blood count measured in three rhesus macaques chronically infected with SIV and given an N-803 regimen (Fig 2) [16]. To avoid overinterpretation of individual NHP data, we elected to train our model using all three subjects simultaneously. For completeness, the methods described hereafter were repeated for each individual subject, and the results are included in Appendix S1.

The error model (Eq. 19) assumes independent, identical, and normally distributed error  $\varepsilon_i \sim \mathcal{N}(0, \sigma_i^2)$  for each of three response variables (indexed by  $i$ ), with no error covariance between response variables.

$$\mathbf{y}_i = f(\mathbf{t}_i, \boldsymbol{\theta}) + \varepsilon_i \quad \text{where} \quad \left. \begin{array}{l} \mathbf{y}_1 = \left\{ \log_{10} \left[ \frac{(\mathbf{V} + \mathbf{W})_j}{(V_0 + W_0)_j} \right] \right\} \\ \mathbf{y}_2 = \left\{ \mathbf{E}_j / (E_0)_j \right\} \\ \mathbf{y}_3 = \left\{ \mathbf{K}_j / (K_0)_j \right\} \end{array} \right\} \quad \text{for } j = 1, 2, 3 \quad (19)$$

Response variables were normalized by initial conditions for each of the three subjects (NHPs, indexed by  $j$ ), as estimated by the mean of the pre-treatment data points. Additionally, virus was log-transformed. Parameter vector  $\boldsymbol{\theta}$  was estimated by the concentrated likelihood method [59]. The negative log likelihood (Eq. 20) was then a function of the sum of squared error,  $S_i$ , and the number of data points,  $n_i$ , for each response variable.

$$\text{NLL}(\boldsymbol{\theta}) = \sum_{i=1}^3 \frac{n_i}{2} \left[ 1 + \ln \left( \frac{S_i(\boldsymbol{\theta})}{n_i} \right) \right] \quad (20)$$

Some viral data points lay on the lower limit of detection for the viral assay (100 CEQ/mL). We found that either omitting or including these data points did not substantively alter parameter estimation. Therefore, these points were omitted in order to maintain statistical correctness with the likelihood function. Initial parameter estimates were obtained via a multi-start local search approach implemented in MATLAB version R2018b (Mathworks). Further details on parameter estimation can be found in Appendix S1.

A subset of parameters with sufficient experimental support was fixed during estimation (Table 3) to improve the identifiability of the remaining parameters. For example, pharmacokinetic parameters were fixed at experimental estimates to allow the N-803 50% effective concentration ( $C_{50}$ ) to be identified [14, 18]. We used non-human primate data whenever available. Parameters that were not fixed were restricted within biologically feasible ranges, if available (Table 3).

### Uncertainty Quantification

In order to quantify the uncertainty of model parameters and predictions, a Bayesian Markov Chain Monte Carlo algorithm was used to sample posterior distributions of the model parameters. Five of the top ten results from the parameter estimation procedure were randomly selected to instantiate a parallel tempering MCMC algorithm [66] that was implemented in the PESTO toolbox [67] for MATLAB. Uniform prior distributions were assumed for all parameters, with boundaries as given in Table 3. The algorithm was run for 400,000 iterations, and the resulting distribution was thinned by selecting every 100<sup>th</sup> sample. The final sample of 4000 was used for figures and statistical analyses.

### Model Comparison

Model comparison was used to identify which model mechanisms (drug tolerance, immune regulation, or viral escape) were required to reproduce the dynamics observed in N-803-treated NHPs. Parameter estimation and uncertainty quantification was performed for the full model (Eq. 1-19) as well as for four additional models (Table 4). Three of the models had either 1) drug tolerance, 2) immune regulation, or 3) viral escape removed. Thus, each of these models combined two of the three mechanisms. The fourth model included only immune regulation (no drug tolerance or viral escape).

**Table 3. Model parameters.**

| Parameter                                                         | Symbol                | Value  | Units                       | Ref.                               |
|-------------------------------------------------------------------|-----------------------|--------|-----------------------------|------------------------------------|
| Initial SIV virions in plasma <sup>a</sup>                        | $V_0+W_0$             | fixed  | 3.83                        | log(CEQ/ml) [16]                   |
| Escape variant initial frequency <sup>a</sup>                     | $f$                   | fitted | (0.001, 1)                  |                                    |
| CD8 <sup>+</sup> T cell killing rate constant                     | $g_E$                 | fitted | ( $2 \cdot 10^{-5}$ , 0.02) | $\mu\text{L}/\#\cdot\text{d}$ [60] |
| NK cell / CD8 <sup>+</sup> T cell killing rate ratio <sup>b</sup> | $g_K/g_E$             | fitted | (0.01, 1)                   | [61, 62]                           |
| Escape variant susceptibility factor                              | $\chi$                | fitted | (0.001, 1)                  |                                    |
| Initial CD8 <sup>+</sup> T cells in peripheral blood              | $E_0$                 | fixed  | 520                         | $\#/\mu\text{L}$ [16]              |
| Initial NK cells in peripheral blood                              | $K_0$                 | fixed  | 231                         | $\#/\mu\text{L}$ [16]              |
| Maximum proliferating cells                                       | $h$                   | fitted | (20, 2000)                  | $\#/\mu\text{L}$                   |
| CD8 <sup>+</sup> T cell death rate constant                       | $d_E$                 | fitted | (0.01, 1)                   | /day [63]                          |
| NK cell death rate constant                                       | $d_K$                 | fitted | (0.01, 1)                   | /day [63]                          |
| Initial N-803 at absorption site                                  | $X_0$                 | fixed  | 880                         | pmol/kg [64]                       |
| N-803 absorption rate constant                                    | $k_a$                 | fixed  | 0.80                        | /day [18]                          |
| N-803 clearance rate constant                                     | $k_e$                 | fixed  | 2.1                         | /day [14]                          |
| N-803 vol. of distribution / bioavailability                      | $v_d/F$               | fixed  | 1.3                         | L/kg [14, 18]                      |
| N-803 50% effective concentration                                 | $C_{50}$              | fitted | (1, 1000)                   | pM [14, 15]                        |
| CD8 <sup>+</sup> T cell maximum expansion rate <sup>c</sup>       | $\rho_E \cdot d_E$    | fitted | (0.02, 2)                   | /day [65]                          |
| NK cell maximum expansion rate <sup>c</sup>                       | $\rho_K \cdot d_K$    | fitted | (0.02, 2)                   | /day [65]                          |
| CD8 <sup>+</sup> T cell killing stimulation factor                | $\gamma_E$            | fitted | (0.01, 100)                 |                                    |
| NK cell killing stimulation factor                                | $\gamma_K$            | fitted | (0.01, 100)                 |                                    |
| Tolerance effect factor                                           | $\eta$                | fitted | (0.01, 100)                 |                                    |
| Proliferation regulation factor                                   | $\varphi$             | fitted | (0.01, 100)                 |                                    |
| Killing regulation factor                                         | $\lambda$             | fitted | (0.01, 100)                 |                                    |
| Number of tolerance variables                                     | $N$                   | fixed  | 6                           | [16]                               |
| Number of regulation variables                                    | $M$                   | fixed  | 2                           | [16]                               |
| Tolerance rate constant                                           | $\delta_{\text{TOL}}$ | fitted | (0.05, 5)                   | /day                               |
| Regulation rate constant                                          | $\delta_{\text{REG}}$ | fitted | (0.05, 5)                   | /day                               |
| Tolerance recovery                                                | $\tau$                | fitted | (0.001, 1)                  |                                    |

Parameters were either fixed at values shown or restricted within ranges shown during all analysis. Parameters not shown were calculated by assuming an approximately steady-state prior to treatment (Eq. 15-18). See Appendix S1 for discussion of values and ranges informed by literature. Ranges for parameters with no measurable experimental analog were intentionally broad.

<sup>a</sup> We assume SIVmac239 gag copy equivalents in the plasma to be proportional to SIV virions in the peripheral blood. The initial conditions for the virus variants  $V$  and  $W$  were determined from the total initial viral load ( $V_0+W_0$ ) and the initial frequency of variant  $W$  ( $f$ ).

<sup>b</sup> The value of the NK cell killing rate constant  $g_K$  is defined as some fraction of CD8<sup>+</sup> T cell killing rate constant  $g_E$ .

<sup>c</sup> The value of proliferation stimulation factors  $\rho_E$ ,  $\rho_K$  are defined by the maximum expansion rates of their respective populations.

**Table 4. Summary of models compared.**

|          | <b>Drug Tolerance</b> | <b>Immune Regulation</b> | <b>Viral Escape</b> | <b>Parameters Removed</b>              | <b>Parameter Count (<math>n_\theta</math>)</b> |
|----------|-----------------------|--------------------------|---------------------|----------------------------------------|------------------------------------------------|
| Control  | √                     | √                        | √                   | none                                   | 27                                             |
| Model #1 |                       | √                        | √                   | $N, \delta_{TOL}, \tau, \eta$          | 23                                             |
| Model #2 | √                     |                          | √                   | $M, \delta_{REG}, \varphi, \lambda$    | 23                                             |
| Model #3 | √                     | √                        |                     | $f, \chi$                              | 25                                             |
| Model #4 |                       | √                        |                     | $N, \delta_{TOL}, \tau, \eta, f, \chi$ | 21                                             |

Variant models #1-#4 were created by fixing select parameters at zero in Eq. (1-18). The parameter count ( $n_\theta$  in Eq. 21) is the remaining number of fixed and fitted parameters (Table 3).

Models were compared based on their quantitative and qualitative ability to reproduce the experimental results. The quantitative assessment was done by comparing both the negative log-likelihood (Eq. 20) and the Akaike Information Criterion (Eq. 21).

$$AIC_c = 2NLL + 2(n_\theta + n_y) \frac{n_t}{n_t - (n_\theta + n_y + 1)} \quad (21)$$

Eq. (21) is adapted the AIC for multivariate regression with small data sets [68]. For our model, the total number of parameters is the length of  $\theta$  ( $n_\theta$ , Table 4), and the number of response variables,  $n_y=3$ , since we are neglecting covariance and, thus, have one error parameter for each response variable. The parameter penalty term is further modified by number of data points. Since each response variable had a different number of data points, we take their average,  $n_t=280/3$ .

Three quality metrics were formulated based on the observed viral response to each cycle of treatment [16]. This assessment focused on the viral load, as it is the most relevant treatment outcome. The metrics are depicted in Figure 4F and mathematically defined in Appendix S1. Briefly, the log fold rebound in cycle 1 is the difference between the minimum virus in cycle one and the virus at the end of treatment cycle 1 (week 4). The two remaining criteria quantify the observation that viral suppression was largest in cycle 1, followed by that of cycle 3, then cycle 2. Thus, these metrics compare the log fold drops of these cycles (difference between virus at the start of the cycle and the minimum virus during that cycle).

### **Per-cell killing (PCK) and related equations**

In order to quantify the effect of immune regulation, drug tolerance, and viral escape on per-cell cytotoxic activity, we defined per-cell killing (PCK, Eq. 22-24). The PCK is mathematically equivalent to the second order rate parameter for cytotoxic action if it were applied to the total infected cell population ( $I_V + I_W$ ) and total cytotoxic cell population ( $E + K$ ).

$$\text{PCK} = \frac{[\text{total killing rate}]}{(E + K)(I_v + I_w)} = \frac{([v] + \chi[w])g_E(1 + \gamma_E[\Theta][\Omega])[e] + g_K(1 + \gamma_K[\Theta][\Omega])[k]}{1 + \lambda[\text{REG}_M]} \quad (22)$$

$$[\Theta] = \left( \frac{[C]}{C_{50} + [C]} \right) \quad (23)$$

$$[\Omega] = \left( \frac{1}{1 + \eta([\text{TOL}_{N-1}] + [\text{TOL}_N])} \right) \quad (24)$$

The effects of immune regulation, drug tolerance, and viral escape on PCK were calculated as follows (Eq. 25-27). The fold change in PCK due to one mechanism was quantified as the ratio of per-cell killing (PCK) with that mechanism to the PCK without that mechanism.

Immune regulation:

$$\frac{\text{PCK}}{\text{PCK}(\lambda=0)} = \frac{1}{1 + \lambda[\text{REG}_M]} \quad (25)$$

Drug tolerance:

$$\frac{\text{PCK}}{\text{PCK}(\eta=0)} = \frac{([v] + \chi[w])g_E(1 + \gamma_E[\Theta][\Omega])[e] + g_K(1 + \gamma_K[\Theta][\Omega])[k]}{([v] + \chi[w])g_E(1 + \gamma_E[\Theta]) [e] + g_K(1 + \gamma_K[\Theta]) [k]} \quad (26)$$

Viral escape:

$$\frac{\text{PCK}}{\text{PCK}(\chi=1)} = \frac{([v] + \chi[w])g_E(1 + \gamma_E[\Theta][\Omega])[e] + g_K(1 + \gamma_K[\Theta][\Omega])[k]}{g_E(1 + \gamma_E[\Theta][\Omega])[e] + g_K(1 + \gamma_K[\Theta][\Omega])[k]} \quad (27)$$

We introduced a measure of viral fitness by calculating the fold change in the overall viral proliferation rate during treatment (Eq. 28), where  $q_v$  and  $q_w$  are collections of constants (Eq. 15,16).

$$\left[ \frac{\text{fold change in}}{\text{viral fitness}} \right] \propto \left[ \frac{\text{fold change in}}{\text{viral proliferation}} \right] = \frac{q_v[v] + q_w[w]}{q_v(1-f) + q_w f} \quad (28)$$

Fold change in CD8<sup>+</sup> T cell and NK cell proliferation due to immune regulation and drug tolerance (Eq. 29,30) were calculated in a manner similar to fold changes in per-cell killing due to immune regulation and drug tolerance. For example, the fold change in CD8<sup>+</sup> T cell proliferation due to immune regulation is defined by the ratio of the proliferation rate with immune regulation over the proliferation rate without immune regulation ( $\varphi = 0$ ).



Immune regulation:

$$\frac{\text{Proliferation}}{\text{Proliferation}(\varphi=0)} = \frac{1}{1 + \varphi[\text{REG}_M]} \quad (29)$$

Drug tolerance:

$$\frac{\text{Proliferation}}{\text{Proliferation}(\eta=0)} = \frac{1 + \rho_i[\Theta][\Omega]}{1 + \rho_i[\Theta]} \quad i = E, K \quad (30)$$

The numerical data used to generate figures is included in the spreadsheet Data S1.

## Results

### **Mathematical model reproduced key aspects of observed dynamics of SIV viremia, CD8<sup>+</sup> T cells, and NK cells during N-803 treatment.**

The full model (Eq. 1-18) was fitted to SIV in the plasma, and CD8<sup>+</sup> T cells and NK cells in the peripheral blood, and Bayesian 95% credible intervals were obtained by MCMC sampling (Fig 3). The data used to create all subsequent figures is available in S2 Data. The model reproduced four key characteristics of the SIV plasma viral load during N-803 treatment (Fig 3). First, the viral load fell sharply during the first 1-2 weeks of treatment (1.00-1.33 log reduction in the model; 1.43-2.08 log reduction in the NHP data) and began to rebound between the first and third week. Second, treatment cycle 2 had a much smaller effect as compared to treatment cycle 1. Third, after treatment cycle 2, the viral load settled to a lower set-point (0.52-0.74 log below pre-treatment viral load in the model; 0.38-0.76 log below in the NHP data). Fourth, the viral response to treatment cycle 3 was similar to the response in treatment cycle 1 but less pronounced (0.13-0.51 log reduction in the model; 0.67-1.30 log reduction in the NHP data).

The model reproduced two characteristics of the response of peripheral blood CD8<sup>+</sup> T cells and NK cells to N-803 (Figs 3B and 3C). First, CD8<sup>+</sup> T cells rose quickly in the first week (2.4- to 4.7-fold in the model; 2- to 4-fold in the NHP data), and NK cells expanded even further (4.6- to 9.1-fold in the model; 1.5- to 10.5-fold in the NHP data). Second, both cell populations began to contract in the blood after 1 week of treatment. Although the model attributes this contraction to cell death, it may have also been due to cell migration out of the blood. IL-15 has been shown to promote migration to lymph tissue [15, 69].

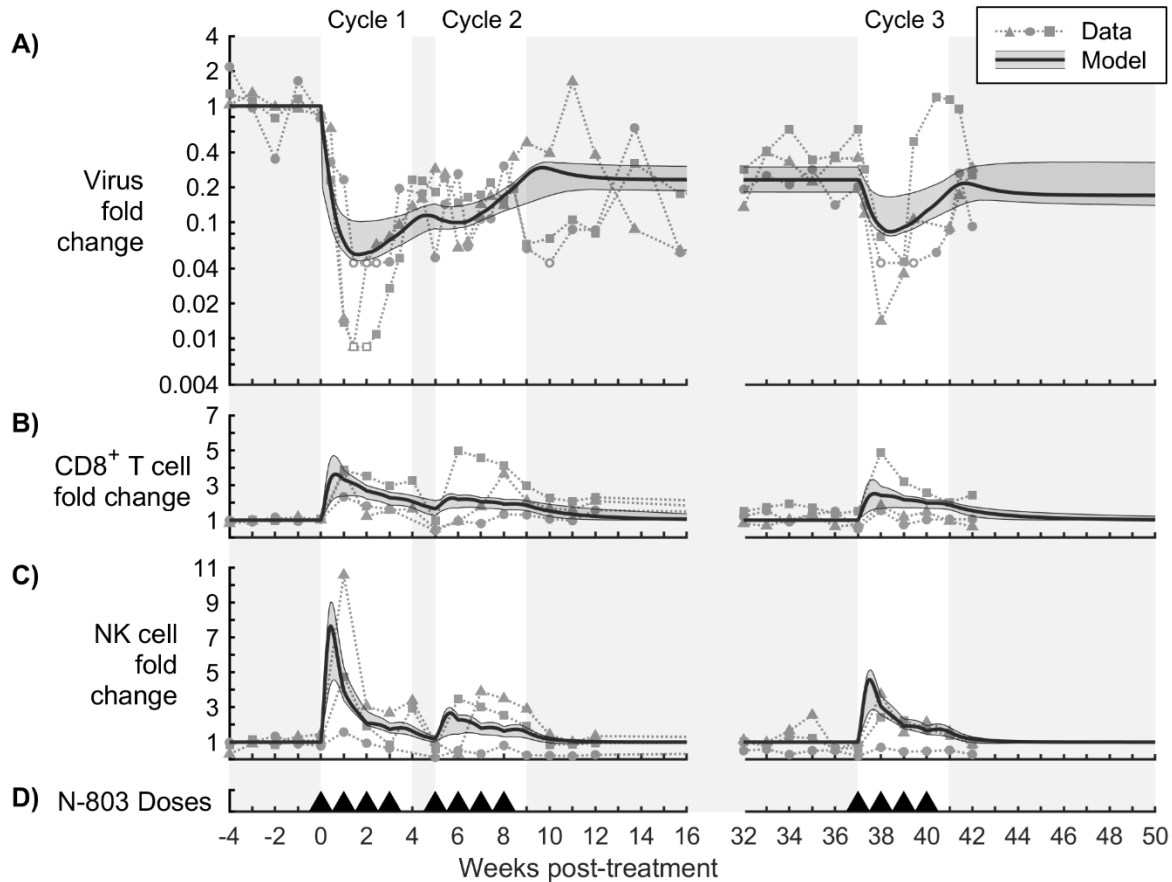

**Fig 3. Model calibration to N-803-treated SIV-infected NHP data.** The model was calibrated to (A) fold change in virus in the plasma, (B) fold change in CD8<sup>+</sup> T cells in the peripheral blood, and (C) fold change in NK cells in the peripheral blood. The bold line corresponds to the best-fit model, and the shaded region corresponds to the Bayesian 95% credible interval. See Figure S1 for corresponding parameter distributions. Data from N-803-treated SIV-infected NHPs are shown as different symbols for each NHP [16]. Open symbols were at the lower limit of detection for the viral assay (100 CEQ/mL) and were omitted from parameter estimation. Panel (D) shows timing of 0.1 mg/kg subcutaneous doses of N-803.

### Immune regulation, coupled with either drug tolerance or viral escape, can reproduce the viral trajectory

The full model of N-803 treatment of SIV (Fig 1) includes three broad mechanisms that can contribute to reduced N-803 efficacy over time: drug tolerance, immune regulation and viral escape. Drug tolerance represents factors which reduce the cells susceptibility to N-803 long-term (Eq. 7-12), such as the downregulation of surface receptors. Immune regulation represents mechanisms that directly inhibit CD8<sup>+</sup> T cell and NK cell proliferation and activation short-term (Eq. 7,8,13,14), which may include increased expression of PD-1 and CD39, increased presence of regulatory T cells, or increased presence of IL-10. Viral escape represents selection of SIV variants that are not recognized by existing CD8<sup>+</sup> T cells (Eq. 1,2). The importance of drug

tolerance, immune regulation, and viral escape to the dynamics of SIV during N-803 treatment regimen was assessed by systematically removing each mechanism and recalibrating the model, comparing to the full model as a control (Fig 4). Models were compared quantitatively using Negative Log-Likelihood (NLL, Eq. 20, Fig 4G), a measure of model fit to the data, and Akaike Information Criterion (AICc, Eq. 21, Fig 4H), which also considers model simplicity. We also considered key characteristics of the viral data that should be present in a suitable model (Fig 4F). First, there was a viral rebound in treatment cycle 1 (Fig 4I). Second, the viral response in cycle 2 was weaker than that in cycle 3 (Fig 4J). Third, the response in cycle 3 was weaker than that in cycle 1 (Fig 4K). These collectively represent changes in the short-term and long-term response that should be present in the model.

Without immune regulation (model #2, Fig 4B), the model failed to meet all the quality criteria. Specifically, the virus only decayed to a post-treatment set point, instead of rebounding during the first treatment cycle (Fig 4I). This demonstrates that immune regulation is required in order to represent the short-term (within treatment cycle) viral rebound dynamics. Furthermore, the viral response in cycle 3 was largely lost, showing little improvement in efficacy with respect to cycle 2 (Fig 4J). The model with immune regulation alone (model #4, Fig 4D) also could not adequately replicate the data, showing only a small rebound in cycle 1 (Fig 4I) and the smallest difference between cycles 1 and 3 (Fig 4K). This model also required a depression NK cell counts following cycle 1 (Fig S2), which was a response observed in only one of the three subjects. Models #2 and #4 also had the highest NLL and AICc scores (Fig. 4G,H), reflecting poorer agreement with the data. This suggests that immune regulation alone cannot replicate both the short- and long-term responses.

The model without drug tolerance (model #1, Fig 4A) and the model without viral escape (model #3, Fig 4C) both reproduced key characteristics of the viral load (Fig 4I-4K). The viral trajectories of these two models were comparable to the full model. Taken together with the results for models #2 and #4, this implies that either drug tolerance or viral escape could have accounted for the long-term changes in viral response. Both models #1 and #3 had comparable or better AICc with respect to the full model (Fig 4H), with model #3 being quantitatively the best model. The higher NLL and AIC for the model without drug tolerance (model #1 compared to model #3 without viral escape) was due in part to a poorer fit to the CD8<sup>+</sup> T cell and NK cell dynamics (Fig 5). When fitting to individual subjects, these model comparison results held for two out of three NHPs, with the third being inconclusive (possibly due censoring, see Appendix S1).

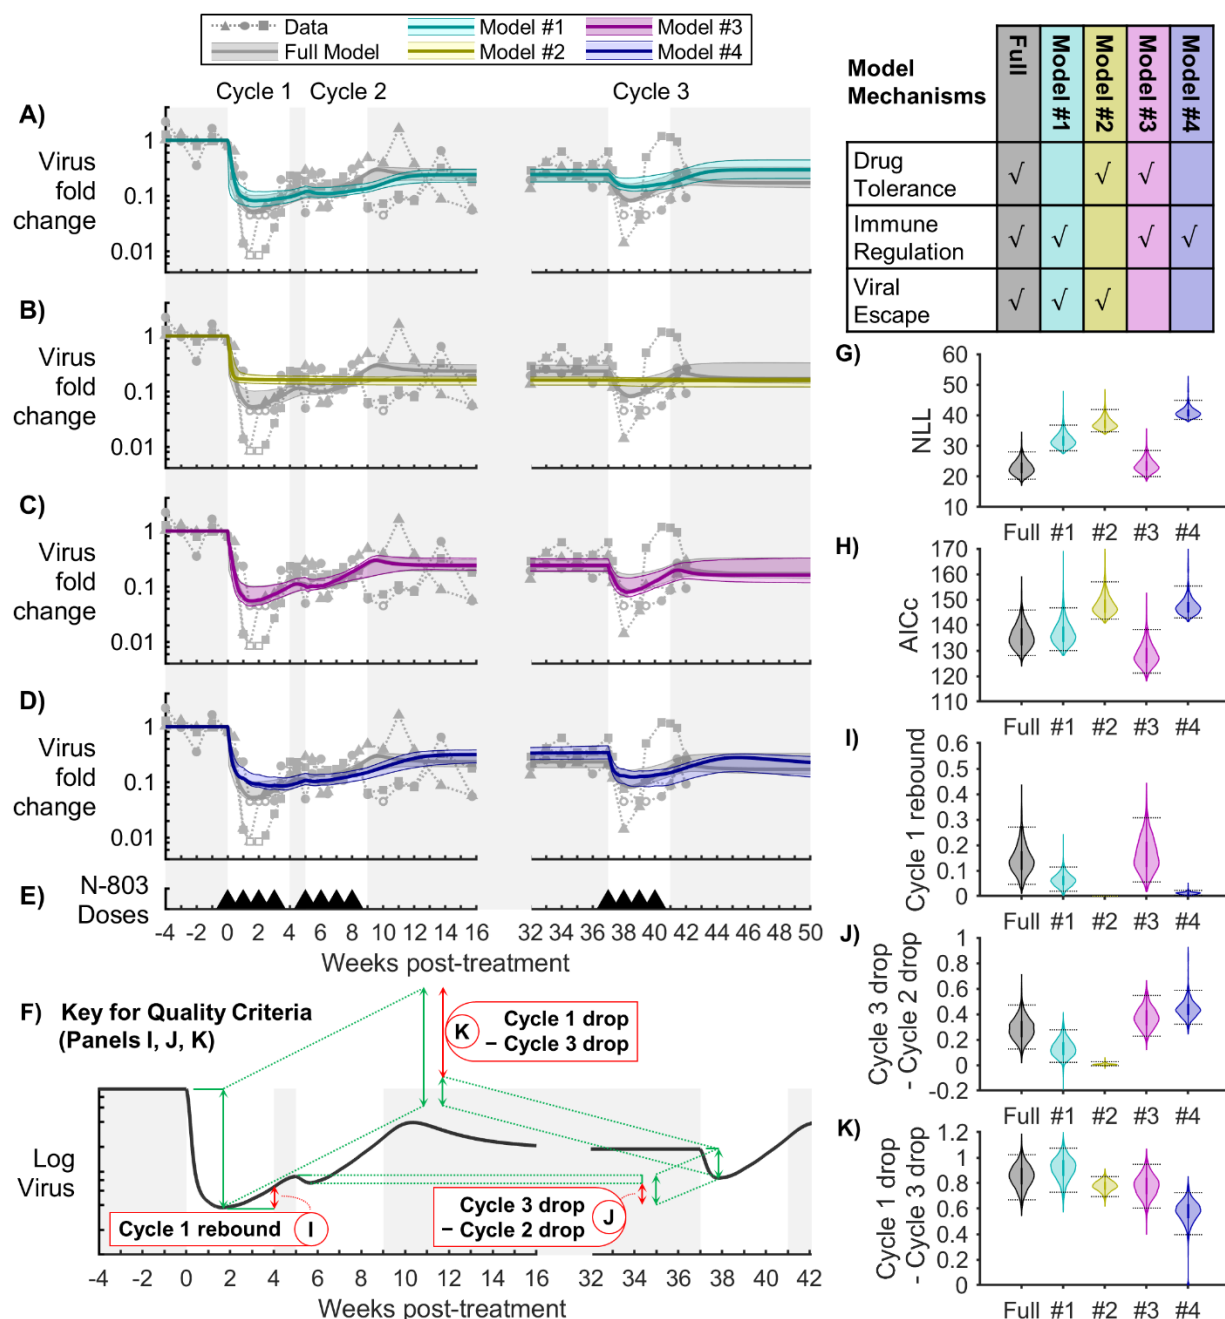

**Fig 4. Model comparison for viral load.** Models with different combinations of mechanisms were compared to assess the importance of drug tolerance, immune regulation, and viral escape. Panels (A-D) compare the fold change in virus between the full model and models #1-4, respectively. The bold line corresponds to the best-fit model, and the shaded region corresponds to the Bayesian 95% credible interval. Data from N-803-treated SIV-infected NHPs are shown as different symbols for each NHP [16]. Open symbols were at the lower limit of detection for the viral assay (100 CEQ/mL) and were omitted from parameter estimation. Panel (E) shows timing of 0.1 mg/kg subcutaneous doses of N-803. Panels (G,H) show the corresponding Negative Log-Likelihood (NLL, Eq. 20) and Akaike Information Criterion (AICc, Eq. 21) for the Bayesian MCMC samples. Panels (I-K) show the three quality criteria, which are described in panel (F). Bayesian 95% credible intervals are marked. Multiple comparison tests on the quality criteria (I-K) showed a statistically significant difference between all models ( $p < 0.01$ ).

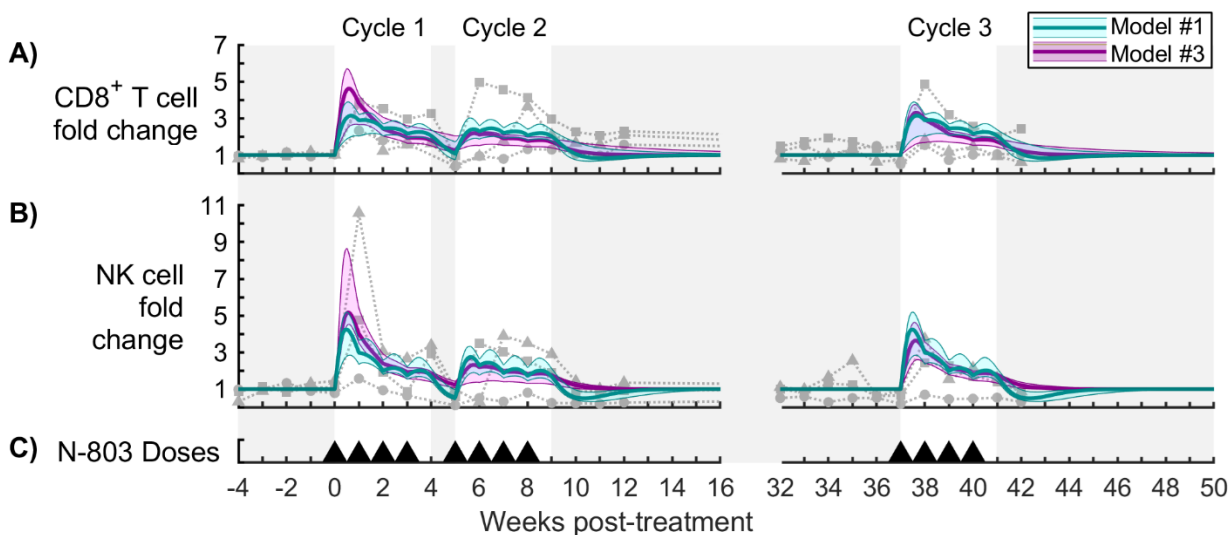

**Fig 5. Model comparison for cytotoxic cells.** Panels (A,B) show fold change in CD8<sup>+</sup> T cells and NK cells in the peripheral blood, respectively, for the model without drug tolerance (cyan model #1) and the model without viral escape (magenta model #3). The bold line corresponds to the best-fit model, and the shaded region corresponds to the Bayesian 95% credible interval. See Figure S1 for corresponding parameter distributions. Data from N-803-treated SIV-infected NHPs are shown as different symbols for each NHP [16]. Panel (C) shows timing of 0.1 mg/kg subcutaneous doses of N-803. See Fig S2 for models #2 and #4.

### Model quantifies substantial loss in per-cell cytotoxic activity during the course of N-803 treatment.

We used the two minimal models (model #1 with immune regulation and viral escape; model #3 with immune regulation and drug tolerance) to quantify the timing and strengths of drug tolerance, immune regulation, and viral escape required to reproduce the observed viral dynamics during N-803 treatment. To this end, we defined a per-cell killing (PCK) metric that can be calculated from fitted parameter values (Eq. 22-24). The PCK is mathematically equivalent to the average rate of killing per infected cell per cytotoxic cell. In other words, multiplying the PCK by the sum of the cytotoxic cells (CD8<sup>+</sup> T cells,  $E$ , and NK cells,  $K$ ) and the sum of infected cells (both viral variants,  $I_V$  and  $I_W$ ) will yield the total rate of loss of infected cells due to cytolytic action. The fold change in PCK due to immune regulation (Eq. 25) was quantified by the ratio of per-cell killing with immune regulation to the PCK without immune regulation ( $PCK(\lambda=0)$ ). The effect of drug tolerance on PCK (Eq. 26) and the effect of viral escape on PCK (Eq. 27) were defined similarly.

Despite a brief increase in PCK, both models predict a significant reduction in per cell killing capacity by week 2 (Figs 6A,7A). Relative to pre-treatment values, PCK fell by 0.76-2.13 log in model #1 and 0.42-0.93 log in model #3 (Bayesian 95% credible intervals), allowing the viral load

to rebound within the first treatment cycle while CD8<sup>+</sup> T cells and NK cells were still elevated (Fig 5). Immune regulation caused a 0.41-1.39 log reduction in PCK by week 2 in model #1 (Fig 6B) and a 0.51-1.27 log reduction in model #3 (Fig 7B). Both models predict a recovery in PCK after treatment cycles (week 4 and week 9), which coincided with recovery from immune regulation. Thus, immune regulation both strongly inhibited cytotoxicity during treatment and abated as the cytotoxic cell population normalized after treatment, precluding a post-treatment surge in viremia.

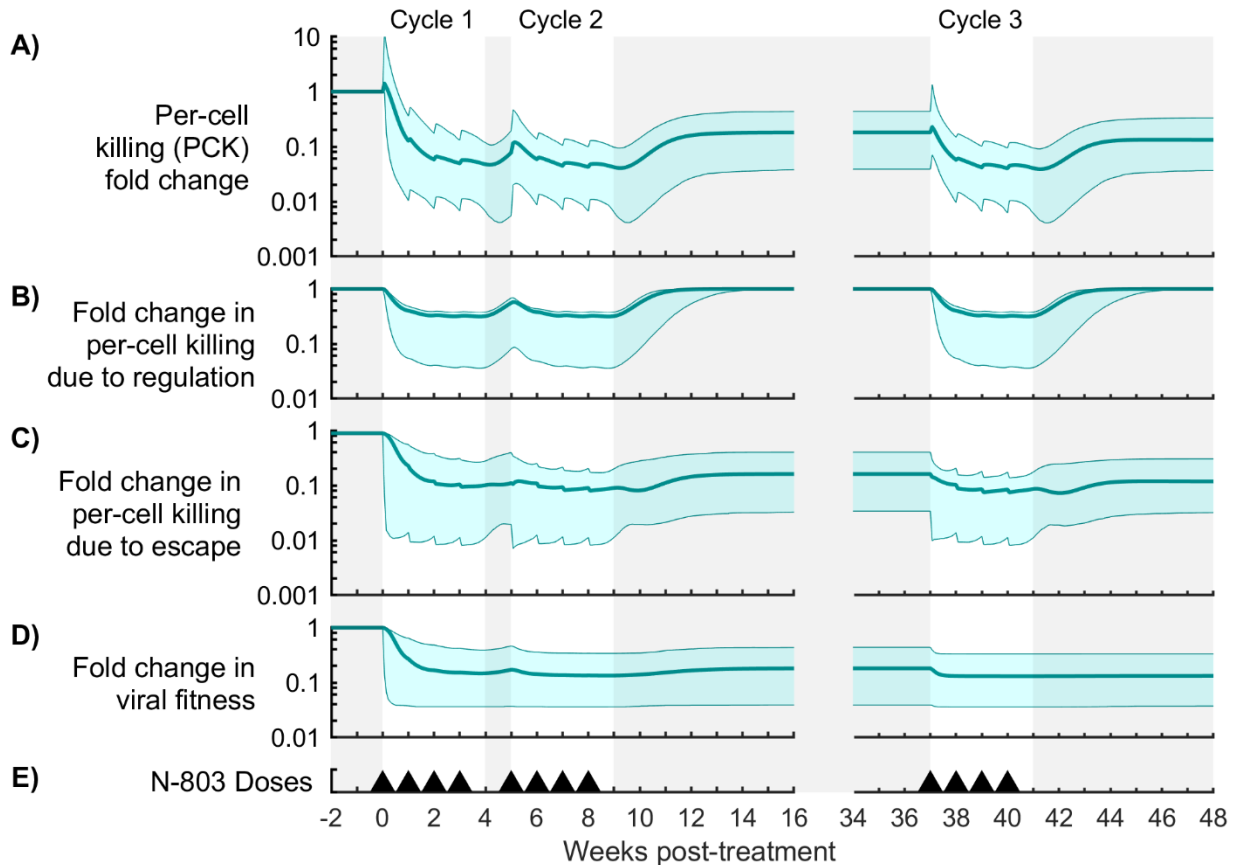

**Fig 6. Contributions of immune regulation and viral escape to per-cell killing (PCK) for Model #1.** Shown are measures of mechanism contribution for the model with immune regulation and viral escape (model #1). Panel (A) shows the fold change in per-cell killing rate, or PCK (Eq. 22-24). Panels (B,C) show the effect of immune regulation and viral escape on PCK (Eq. 25,27). Panel (D) shows a measure of viral fitness (Eq. 28). The bold line corresponds to the best-fit model, and the shaded region corresponds to the Bayesian 95% credible interval. Panel (E) shows timing of 0.1 mg/kg subcutaneous doses of N-803.



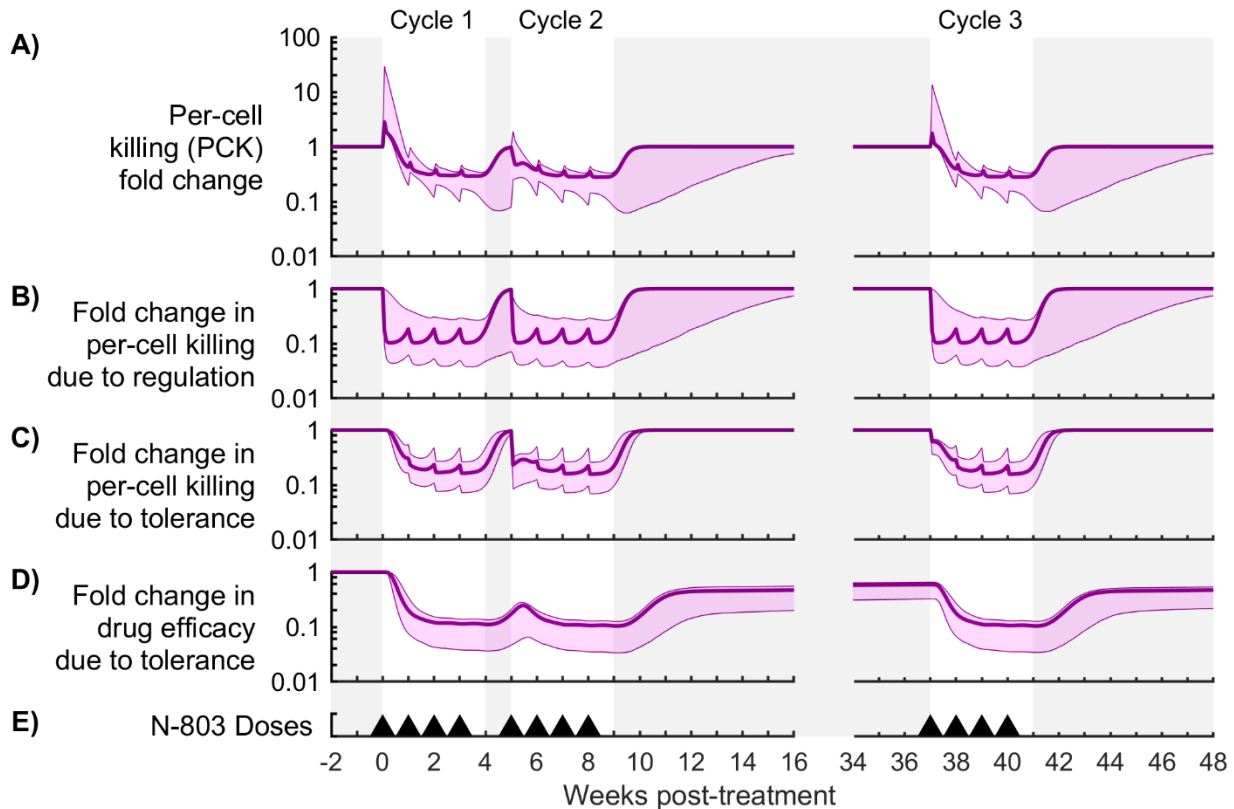

**Fig 7. Contributions of immune regulation and drug tolerance to per-cell killing (PCK) for Model #3.** Shown are measures of mechanism contribution for the model with immune regulation and drug tolerance (model #3). Panel (A) shows the fold change in per-cell killing rate, or PCK (Eq. 22-24). Panels (B,C) show the effect of immune regulation and drug tolerance on PCK (Eq. 25, 26). Panel (D) shows the effect of tolerance on drug efficacy (Eq. 24). The bold line corresponds to the best-fit model, and the shaded region corresponds to the Bayesian 95% credible interval. Panel (E) shows timing of 0.1 mg/kg subcutaneous doses of N-803.

In model #1, viral escape also strongly reduced PCK (0.39-1.87 log reduction by week 2, Fig 6C). However, viral escape was more persistent than immune regulation, maintaining PCK at 0.36-1.41 log below pre-treatment killing rates between cycles 2 and 3 (Fig 6A). This escape from the CD8<sup>+</sup> T cell response was accompanied by a balancing reduction in viral fitness, which was estimated from the model by the fold change in the total viral proliferation rate (Fig 6D, Eq. 28). In model #3, drug tolerance also reduced PCK comparable to immune regulation (0.31-0.96 log reduction by week 2, Fig 6C). Drug tolerance also reduced CD8<sup>+</sup> T cell and NK cell proliferation by 0.22-0.70 log and 0.15-0.59 log, respectively (Fig S3, Eq. 29), while immune regulation had a negligible effect on proliferation in this model. A fraction of drug tolerance persisted across the treatment gap between cycles 2 and 3 (Fig. 7D), resulting in the first dose of cycle 3 (week 37) being 34-68% less effective than the first dose of cycle 1. Thus, drug tolerance reduced viral suppression in cycle 3 partly by modulating the proliferative response of CD8<sup>+</sup> T cells and NK



cells to N-803. These and other observations were also supported by global sensitivity analysis (see Appendix S1). The timing of immune regulation and drug tolerance in the model is consistent with expression of inhibitory markers (PD-1 and CD39) and IL-15 receptor subunits (CD122 and CD132) (further details in Appendix S1).

### **N-803 treatment outcome can be improved by larger dosing periods and simultaneous regulatory blockade.**

To test if the effects of immune regulation, drug tolerance, and viral escape can be overcome through treatment regimen changes, we predicted the impact of dosing periods and combination therapy on N-803 efficacy. We used both model #1 (immune regulation and viral escape) and model #3 (immune regulation and drug tolerance). Two treatment alternatives were tested: increasing time between doses; and blocking immune regulatory pathways.

Delivering 0.1 mg/kg subcutaneous N-803 doses at 2, 3, and 4 weeks apart yielded lower viral loads in both models, as compared to the current 1-week regimen (Figs 8A, S4A, and S5A). Delivering doses 4 weeks apart resulted in a post-treatment viral load that was 0.09-0.58 log below that of the original regimen for the model #1 and 0.65-3.85 log below for model #3 (Bayesian 95% credible intervals). Dose spacing provided the greatest benefit in model #3 because longer windows between doses allowed more time for immune regulation and drug tolerance to abate (Figs S5B and S5C). In model #1, similar recovery from immune regulation was observed (Fig S4B), but treatment still ultimately resulted in selection of the T cell escape variant (Fig S4C). Taken together this indicates that dosing frequency changes are most likely to improve treatment outcomes if drug tolerance plays a significant part in the observed long-term NHP viral responses.

The second regimen change we explored was to reduce the killing regulation parameter ( $\lambda$ ) to reflect the potential addition of a drug that blocks regulatory pathways (e.g. PD-1 or PD-L1 antagonists [70-73]). Reducing killing regulation ( $\lambda$ ) by 40, 70, and 90% resulted in lower viral loads in both models (Figs 8B, S4D, and S5D). A 40% reduction in  $\lambda$  resulted in a 0.12-0.77 log lower average post-treatment viral load for model #1, compared to the original regimen, and a 0.33-1.91 log lower viral load for model #3. For model #3, the impact of reducing killing regulation was greater for cases when regulation acted early in the treatment cycle (Fig S5D). In model #1, increasing regulatory blockade yielded only small changes in the early viral reduction (Fig S4D) and hastened selection for T cell resistance (Fig S4F). In summary, blockade of immune

regulation was consistently effective during weekly N-803 treatment in both models, but, if viral escape is limited (as assumed in model #3), it is especially effective early in the dosing period. Biologically, viral escape could be limited if the CD8<sup>+</sup> T cell responses are targeted to conserved viral epitopes [74, 75].

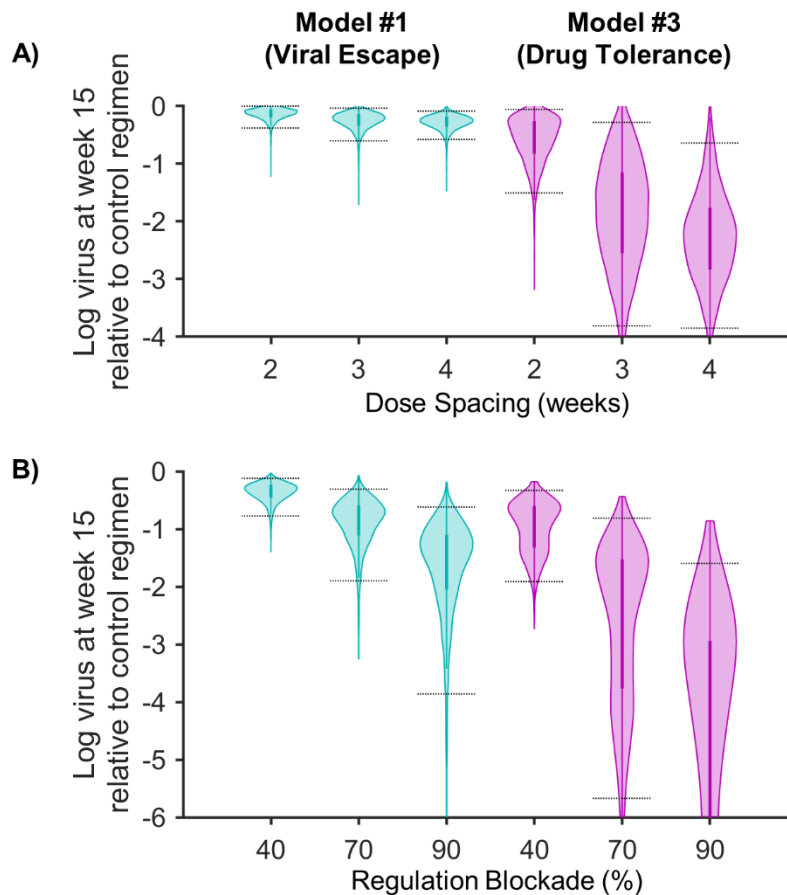

**Fig 8. Potential for regimen changes to improve N-803 treatment outcome.** Shown is a summary of the results of treatment exploration for both the model with immune regulation and viral escape (model #1, left column) and the model with immune regulation and drug tolerance (model #3, right column). Both panels show the log difference in viral load at week 15 as compared to the control regimen (Fig 2 dosing schedule, with no regulation blockade). Panel (A) shows the difference with 2-, 3-, and 4-week dosing regimens. Panel (B) shows the difference with 40, 70 and 90% regulatory blockade (% reductions of killing regulation parameter  $\lambda$ ). Bayesian 95% credible intervals are marked. With the exception of changing dose spacing for model #1 (panel A, left), all results were different from zero and different from each other with  $p < 0.01$ . (See Appendix S1 for statistical method).

## Discussion

We presented novel mathematical models representing immunotherapy of HIV through cytotoxic cell stimulation with an IL-15 superagonist (N-803). We combined the pharmacokinetics and pharmacodynamics of N-803 with an HIV infection model that includes cytotoxic T-cell and NK cell populations as well as experimentally identified mechanisms that lower N-803 efficacy: drug tolerance, immune regulation, and viral escape. The models were applied to analyze data collected from NHPs infected with SIV and treated with three cycles of N-803 [16]. The models reproduced key aspects of the viral and cytotoxic cell trajectories measured in the NHPs, including the transient suppression of viral load with weekly dosing and the partial recovery of drug efficacy following a 29-week break in treatment. Our models predicted how the cytotoxic effector functions of CD8<sup>+</sup> T cells and NK cells were diminished during treatment, resulting in rebound of the viral load during treatment. Model comparison suggested that immune regulatory pathways played an important role in the suppression of cytotoxic activity, as this mechanism was required for the model to reproduce viral dynamics in the first treatment cycle. Either drug tolerance or viral escape (or some combination thereof) were capable of accounting for the diminished response of the viral load to the third treatment cycle (relative to the first). The models predicted that adjusting the dosing period of N-803 or complementing with regulatory blockade could improve treatment outcomes. However, the ultimate effectiveness of N-803 monotherapy could be limited by viral escape from the CD8<sup>+</sup> T cell response.

We investigated two approaches to countermanding regulatory signals during N-803 treatment. First, we predict that simultaneous blockade of regulatory signals, along with N-803 treatment, could preclude the viral rebound observed during a weekly N-803 regimen, even if viral escape from the CD8<sup>+</sup> T cell response is a strong factor. Such combination of PD-1/PD-L1 blockade and an IL-15 agonist has shown promise against cancer in vitro [73]. Furthermore, blockade of the PD-1 pathway via anti-PD-1 or anti-PD-L1 antibodies in the absence of N-803 improved CD8<sup>+</sup> T cell function and reduced viral load in SIV-infected NHPs [70, 71] and increased HIV-1-specific CD8<sup>+</sup> T cell cytotoxicity in some participants in a clinical trial [72]. Our results suggest that IL-15-superagonist and PD-1/PD-L1 blockade combination therapy could be effective against HIV. The second method of countermanding regulation is extending the length of time between N-803 doses. Our model indicates that, when initiating N-803 treatment, there may be a period of cytotoxic stimulation before immune suppression. If subsequent doses are administered after the regulatory signal has abated, stronger efficacy can be achieved for each dose. Rigorous dosing optimization would require a model with more detailed representation of regulatory pathways such

as PD-1, as well as experimental data that frequently measures inhibitory marker dynamics during the critical first week after an N-803 dose. Nonetheless, our model indicates that doses spaced at least 2 weeks apart could improve N-803 efficacy.

N-803 immunotherapy may be perturbing the disease system in ways that persist long term, as evidenced by changes in the proliferative response of NK cells in the third cycle of treatment (drug tolerance) and by changes in the sequences of CD8<sup>+</sup> T cell epitopes in the viral population (viral escape) [16]. Our model demonstrated that long-term changes could be the result of either or both of these phenomena. Further studies will be needed to better quantify the relative contribution of drug tolerance and viral escape in NHPs, and these contributions will affect further N-803 treatment development. If drug tolerance is the main driving mechanism behind the long-term response to N-803 treatment, the effect of tolerance may be circumvented with an optimized dosing regimen. In contrast, while viral escape did not completely preclude a successful N-803 regimen, it limited the impact of all treatment changes (compare model #3 to model #1).

N-803 also has potential to be combined with other therapeutic approaches. There may be a need to couple N-803 with a vaccine that elicits CD8<sup>+</sup> T cells responses targeting conserved viral epitopes. It was postulated that the viral suppression observed in the NHPs used for this study was enabled by the vaccine status of the animals [16]. Additionally, N-803 was shown to enhanced antibody dependent cell-mediated cytotoxicity (ADCC) in NK cells against human cancer cells [76], suggesting a potential for synergy with bnAbs. In ART-treated, SIV-infected NHPs, delivering either therapeutic vaccines [77] or broadly neutralizing antibodies (bnAbs) [78], in combination with an activator (a TLR7 agonist), delayed viral rebound after ART cessation. Future iterations of this model could include ART suppression of viral production [33, 34]. Such inclusion would likely require a detailed representation of latent viral infection to account for the importance of the viral reservoir in viral rebound as well as the potential latency reversal effects of N-803 [41, 42, 79].

Infected cells can evade detection by either not actively producing virions (latent infection [3, 80, 81]) or by existing in immune privileged tissues (e.g. central nervous system [82] or B-cell follicles in lymph nodes [83]). N-803 has interesting properties regarding both of these mechanisms that could be incorporated in more comprehensive future models. First, N-803 is a latency reversing agent [41, 79], which was neglected in our model. Reactivation of latent infections may have contributed to viral rebound and escape in the N-803 treated NHPs. Furthermore, the addition of

PD-1 blockade, as discussed earlier, could enhance the latency reversing effect [84]. Including a latency mechanism would allow the model to more explicitly address these phenomena and inform the degree to which N-803 could reduce the latent reservoir. It would be beneficial to separately quantify the dynamics of productively infected and latently infected cells, following Banks et. al. [27]. Second, N-803 also induces cytotoxic T-cell migration into lymph tissue and B-cell follicles [15]. Our current model does not account for trafficking between blood and lymph tissue, though N-803-induced migration of CD8<sup>+</sup> T cells into B-cell follicles is phenomenologically represented by increases in killing rate according to parameters  $\gamma_E, \gamma_K$  (Eq. 7). Increased trafficking out of the blood may also have accounted for some of the observed contraction in peripheral blood CD8<sup>+</sup> T cells and NK cells in our NHP data. The importance of these phenomena could be more explicitly addressed by expanding the current model to include lymph node dynamics. This would allow us to ascertain how the currently predicted results from treatment improvements would translate into cloistered compartments, allowing for a better estimation of the effect of N-803 on the total body viremia.

Our model could be adapted and calibrated to data from different NHP cohorts, comparing SIV controllers and progressors or comparing N-803 responders and non-responders. While N-803 treatment reduced the plasma SIV load in our NHPs [16], similar reductions of SIV in the plasma were not consistently demonstrated in other studies using N-803 [15] or monomeric IL-15 [9, 10]. This may be because our cohort was predisposed to SIV control, which could be due to multiple factors. For example, both the Mamu-B\*08 allele [85] and the Mamu-B\*17 allele [86] are associated with better immune control of SIV in rhesus macaques. Beyond MHC expression, there is also evidence that CD8<sup>+</sup> T cells of human elite controllers have transcriptional signatures that favor cytokine expression over cytolytic functions, as compared to CD8<sup>+</sup> T cells from chronic progressors [87]. Mechanisms behind elite control of SIV/HIV still need to be elucidated by further experimental and modeling studies. Future mathematical models could evaluate the possible influence of MHC alleles and CD8<sup>+</sup> functionality in driving differences between these groups.

While the timing of the viral suppression and rebound with N-803 was replicated, the extent of the suppression was underrepresented in our models compared to some of the subjects' data. This may stem from some of the model assumptions or from the minimalist representation of the mechanisms in question. It should also be noted that there was significant variability in the measured response between subjects, particularly that of CD8<sup>+</sup> T cells and NK cells. Larger data sets will be needed for the models to properly characterize distributions of individual responses

and make robust predictions for individuals. Nonetheless, our models were able to reproduce the varying response across different cycles of treatment that were separated by short or long timespans, which was the biological question of interest.

In summary, we developed and analyzed a mathematical model to help decode the complex immune interactions induced by N-803-therapy of HIV. This work will inform not only N-803 treatment but also its potential combination with other immune therapies and ART toward a functional cure for HIV.

## Acknowledgments

We thank ImmunityBio for supplying the reagent N-803.

## References

1. UNAIDS. UNAIDS DATA 2020: UNAIDS; 2020 [cited 2018 9/2/2020]. Available from: [https://www.unaids.org/sites/default/files/media\\_asset/2020\\_aids-data-book\\_en.pdf](https://www.unaids.org/sites/default/files/media_asset/2020_aids-data-book_en.pdf).
2. Etemad B, Esmaeilzadeh E, Li JZ. Learning From the Exceptions: HIV Remission in Post-treatment Controllers. *Frontiers in immunology*. 2019;10:1749. Epub 2019/08/10. doi: 10.3389/fimmu.2019.01749. PubMed PMID: 31396237; PubMed Central PMCID: PMC6668499.
3. Thorlund K, Horwitz MS, Fife BT, Lester R, Cameron DW. Landscape review of current HIV 'kick and kill' cure research - some kicking, not enough killing. *BMC infectious diseases*. 2017;17(1):595. Epub 2017/08/31. doi: 10.1186/s12879-017-2683-3. PubMed PMID: 28851294; PubMed Central PMCID: PMC65576299.
4. Perreau M, Banga R, Pantaleo G. Targeted Immune Interventions for an HIV-1 Cure. *Trends in molecular medicine*. 2017;23(10):945-61. Epub 2017/09/12. doi: 10.1016/j.molmed.2017.08.006. PubMed PMID: 28890135.
5. Saeidi A, Zandi K, Cheok YY, Saeidi H, Wong WF, Lee CYQ, et al. T-Cell Exhaustion in Chronic Infections: Reversing the State of Exhaustion and Reinvigorating Optimal Protective Immune Responses. *Frontiers in immunology*. 2018;9:2569. Epub 2018/11/27. doi: 10.3389/fimmu.2018.02569. PubMed PMID: 30473697; PubMed Central PMCID: PMC6237934.
6. Ram DR, Manickam C, Lucar O, Shah SV, Reeves RK. Adaptive NK cell responses in HIV/SIV infections: A roadmap to cell-based therapeutics? *Journal of leukocyte*



- biology. 2019;105(6):1253-9. Epub 2019/02/08. doi: 10.1002/jlb.Mr0718-303r. PubMed PMID: 30730588; PubMed Central PMCID: PMC6536345.
7. Robinson TO, Schluns KS. The potential and promise of IL-15 in immuno-oncogenic therapies. *Immunology letters*. 2017;190:159-68. Epub 2017/08/22. doi: 10.1016/j.imlet.2017.08.010. PubMed PMID: 28823521; PubMed Central PMCID: PMC65774016.
  8. Patidar M, Yadav N, Dalai SK. Interleukin 15: A key cytokine for immunotherapy. *Cytokine & growth factor reviews*. 2016;31:49-59. Epub 2016/06/22. doi: 10.1016/j.cytogfr.2016.06.001. PubMed PMID: 27325459.
  9. Mueller YM, Petrovas C, Bojczuk PM, Dimitriou ID, Beer B, Silvera P, et al. Interleukin-15 increases effector memory CD8+ t cells and NK Cells in simian immunodeficiency virus-infected macaques. *Journal of virology*. 2005;79(8):4877-85. Epub 2005/03/30. doi: 10.1128/jvi.79.8.4877-4885.2005. PubMed PMID: 15795273; PubMed Central PMCID: PMC1069542.
  10. Mueller YM, Do DH, Altork SR, Artlett CM, Gracely EJ, Katsetos CD, et al. IL-15 treatment during acute simian immunodeficiency virus (SIV) infection increases viral set point and accelerates disease progression despite the induction of stronger SIV-specific CD8+ T cell responses. *Journal of immunology (Baltimore, Md : 1950)*. 2008;180(1):350-60. Epub 2007/12/22. doi: 10.4049/jimmunol.180.1.350. PubMed PMID: 18097036; PubMed Central PMCID: PMC2929904.
  11. Watson DC, Moysi E, Valentin A, Bergamaschi C, Devasundaram S, Fortis SP, et al. Treatment with native heterodimeric IL-15 increases cytotoxic lymphocytes and reduces SHIV RNA in lymph nodes. *PLoS pathogens*. 2018;14(2):e1006902. Epub 2018/02/24. doi: 10.1371/journal.ppat.1006902. PubMed PMID: 29474450; PubMed Central PMCID: PMC5825155.
  12. Zhu X, Marcus WD, Xu W, Lee HI, Han K, Egan JO, et al. Novel human interleukin-15 agonists. *Journal of immunology (Baltimore, Md : 1950)*. 2009;183(6):3598-607. Epub 2009/08/28. doi: 10.4049/jimmunol.0901244. PubMed PMID: 19710453; PubMed Central PMCID: PMC2814526.
  13. Stoklasek TA, Schluns KS, Lefrançois L. Combined IL-15/IL-15Ralpha immunotherapy maximizes IL-15 activity in vivo. *Journal of immunology (Baltimore, Md : 1950)*. 2006;177(9):6072-80. Epub 2006/10/24. doi: 10.4049/jimmunol.177.9.6072. PubMed PMID: 17056533; PubMed Central PMCID: PMC2847275.



14. Rhode PR, Egan JO, Xu W, Hong H, Webb GM, Chen X, et al. Comparison of the Superagonist Complex, ALT-803, to IL15 as Cancer Immunotherapeutics in Animal Models. *Cancer immunology research*. 2016;4(1):49-60. Epub 2015/10/30. doi: 10.1158/2326-6066.cir-15-0093-t. PubMed PMID: 26511282; PubMed Central PMCID: PMCPMC4703482.
15. Webb GM, Li S, Mwakalundwa G, Folkvord JM, Greene JM, Reed JS, et al. The human IL-15 superagonist ALT-803 directs SIV-specific CD8(+) T cells into B-cell follicles. *Blood advances*. 2018;2(2):76-84. Epub 2018/01/25. doi: 10.1182/bloodadvances.2017012971. PubMed PMID: 29365313; PubMed Central PMCID: PMCPMC5787870 Corporation. The remaining authors declare no competing financial interests.
16. Ellis-Connell AL, Balgeman AJ, Zarbock KR, Barry G, Weiler A, Egan JO, et al. ALT-803 Transiently Reduces Simian Immunodeficiency Virus Replication in the Absence of Antiretroviral Treatment. *Journal of virology*. 2018;92(3). Epub 2017/11/10. doi: 10.1128/jvi.01748-17. PubMed PMID: 29118125; PubMed Central PMCID: PMCPMC5774892.
17. Wrangle JM, Velcheti V, Patel MR, Garrett-Mayer E, Hill EG, Ravenel JG, et al. ALT-803, an IL-15 superagonist, in combination with nivolumab in patients with metastatic non-small cell lung cancer: a non-randomised, open-label, phase 1b trial. *The Lancet Oncology*. 2018;19(5):694-704. Epub 2018/04/10. doi: 10.1016/s1470-2045(18)30148-7. PubMed PMID: 29628312; PubMed Central PMCID: PMCPMC6089612.
18. Romee R, Cooley S, Berrien-Elliott MM, Westervelt P, Verneris MR, Wagner JE, et al. First-in-human phase 1 clinical study of the IL-15 superagonist complex ALT-803 to treat relapse after transplantation. *Blood*. 2018;131(23):2515-27. Epub 2018/02/22. doi: 10.1182/blood-2017-12-823757. PubMed PMID: 29463563; PubMed Central PMCID: PMCPMC5992862 support from Altor BioScience, a Nantworks company, but have no financial benefit from the outcome of this trial. J.O.E., E.K.J., A.R., and H.C.W. are employees of Altor BioScience and declare direct financial conflicts. To manage these conflicts, UMN and WUSM investigators led this trial, were sponsors of the IND, managed all the data in the study, and had final responsibility for the manuscript. The study protocol was an investigator-initiated clinical trial. UMN and WUSM investigators performed the clinical trial including data collection, analysis, and interpretation. Altor BioScience performed ALT-803 and cytokine measurements and immunogenicity

- testing on coded samples. The remaining correlative assays and all statistical analyses were performed by UMN and WUSM. The remaining authors declare no competing financial interests.
19. Margolin K, Morishima C, Velcheti V, Miller JS, Lee SM, Silk AW, et al. Phase I Trial of ALT-803, A Novel Recombinant IL15 Complex, in Patients with Advanced Solid Tumors. *Clinical cancer research : an official journal of the American Association for Cancer Research*. 2018. Epub 2018/07/27. doi: 10.1158/1078-0432.Ccr-18-0945. PubMed PMID: 30045932.
  20. Kim PS, Kwilas AR, Xu W, Alter S, Jeng EK, Wong HC, et al. IL-15 superagonist/IL-15 $\alpha$ Sushi-Fc fusion complex (IL-15SA/IL-15 $\alpha$ Su-Fc; ALT-803) markedly enhances specific subpopulations of NK and memory CD8<sup>+</sup> T cells, and mediates potent anti-tumor activity against murine breast and colon carcinomas. *Oncotarget*. 2016;7(13):16130-45. Epub 2016/02/26. doi: 10.18632/oncotarget.7470. PubMed PMID: 26910920; PubMed Central PMCID: PMC4941302.
  21. Burrack KS, Huggins MA, Taras E, Dougherty P, Henzler CM, Yang R, et al. Interleukin-15 Complex Treatment Protects Mice from Cerebral Malaria by Inducing Interleukin-10-Producing Natural Killer Cells. *Immunity*. 2018;48(4):760-72.e4. Epub 2018/04/08. doi: 10.1016/j.immuni.2018.03.012. PubMed PMID: 29625893; PubMed Central PMCID: PMC5906161.
  22. Phillips RE, Rowland-Jones S, Nixon DF, Gotch FM, Edwards JP, Ogunlesi AO, et al. Human immunodeficiency virus genetic variation that can escape cytotoxic T cell recognition. *Nature*. 1991;354(6353):453-9. Epub 1991/12/12. doi: 10.1038/354453a0. PubMed PMID: 1721107.
  23. Goulder PJ, Watkins DI. HIV and SIV CTL escape: implications for vaccine design. *Nature reviews Immunology*. 2004;4(8):630-40. Epub 2004/08/03. doi: 10.1038/nri1417. PubMed PMID: 15286729.
  24. Allen TM, O'Connor DH, Jing P, Dzuris JL, Mothé BR, Vogel TU, et al. Tat-specific cytotoxic T lymphocytes select for SIV escape variants during resolution of primary viraemia. *Nature*. 2000;407(6802):386-90. Epub 2000/10/03. doi: 10.1038/35030124. PubMed PMID: 11014195.
  25. Padmanabhan P, Dixit NM. Models of Viral Population Dynamics. *Current topics in microbiology and immunology*. 2016;392:277-302. Epub 2015/07/16. doi: 10.1007/82\_2015\_458. PubMed PMID: 26174625.

26. Perelson AS, Ribeiro RM. Modeling the within-host dynamics of HIV infection. *BMC biology*. 2013;11:96. Epub 2013/09/12. doi: 10.1186/1741-7007-11-96. PubMed PMID: 24020860; PubMed Central PMCID: PMC3765939.
27. Banks HT, Flores KB, Hu S, Rosenberg E, Buzon M, Yu X, et al. Immuno-modulatory strategies for reduction of HIV reservoir cells. *Journal of theoretical biology*. 2015;372:146-58. Epub 2015/02/24. doi: 10.1016/j.jtbi.2015.02.006. PubMed PMID: 25701451; PubMed Central PMCID: PMC3765939.
28. Petracic J, Martyushev A, Reece JC, Kent SJ, Davenport MP. Modeling the timing of antiretroviral drug administration during HIV treatment. *Journal of virology*. 2014;88(24):14050-6. Epub 2014/09/26. doi: 10.1128/jvi.01701-14. PubMed PMID: 25253352; PubMed Central PMCID: PMC3765939.
29. Althaus CL, De Boer RJ. Dynamics of immune escape during HIV/SIV infection. *PLoS computational biology*. 2008;4(7):e1000103. Epub 2008/07/19. doi: 10.1371/journal.pcbi.1000103. PubMed PMID: 18636096; PubMed Central PMCID: PMC3765939.
30. Simonov M, Rawlings RA, Comment N, Reed SE, Shi X, Nelson PW. Modeling adaptive regulatory T-cell dynamics during early HIV infection. *PloS one*. 2012;7(4):e33924. Epub 2012/04/27. doi: 10.1371/journal.pone.0033924. PubMed PMID: 22536321; PubMed Central PMCID: PMC3765939.
31. Wendelsdorf K, Dean G, Hu S, Nordone S, Banks HT. Host immune responses that promote initial HIV spread. *Journal of theoretical biology*. 2011;289:17-35. Epub 2011/08/30. doi: 10.1016/j.jtbi.2011.08.012. PubMed PMID: 21871901; PubMed Central PMCID: PMC3765939.
32. Read EL, Tovo-Dwyer AA, Chakraborty AK. Stochastic effects are important in intrahost HIV evolution even when viral loads are high. *Proceedings of the National Academy of Sciences of the United States of America*. 2012;109(48):19727-32. Epub 2012/11/01. doi: 10.1073/pnas.1206940109. PubMed PMID: 23112156; PubMed Central PMCID: PMC3765939.
33. Cardozo EF, Andrade A, Mellors JW, Kuritzkes DR, Perelson AS, Ribeiro RM. Treatment with integrase inhibitor suggests a new interpretation of HIV RNA decay curves that reveals a subset of cells with slow integration. *PLoS pathogens*. 2017;13(7):e1006478. Epub 2017/07/06. doi: 10.1371/journal.ppat.1006478. PubMed PMID: 28678879; PubMed Central PMCID: PMC3765939.

34. Conway JM, Perelson AS. Residual Viremia in Treated HIV+ Individuals. *PLoS computational biology*. 2016;12(1):e1004677. Epub 2016/01/07. doi: 10.1371/journal.pcbi.1004677. PubMed PMID: 26735135; PubMed Central PMCID: PMC4703306.
35. van Zyl G, Bale MJ, Kearney MF. HIV evolution and diversity in ART-treated patients. *Retrovirology*. 2018;15(1):14. Epub 2018/01/31. doi: 10.1186/s12977-018-0395-4. PubMed PMID: 29378595; PubMed Central PMCID: PMC5789667.
36. Sung JM, Margolis DM. HIV Persistence on Antiretroviral Therapy and Barriers to a Cure. *Advances in experimental medicine and biology*. 2018;1075:165-85. Epub 2018/07/22. doi: 10.1007/978-981-13-0484-2\_7. PubMed PMID: 30030793.
37. Hill AL, Rosenbloom DIS, Nowak MA, Siliciano RF. Insight into treatment of HIV infection from viral dynamics models. *Immunological reviews*. 2018;285(1):9-25. Epub 2018/08/22. doi: 10.1111/imr.12698. PubMed PMID: 30129208; PubMed Central PMCID: PMC6155466.
38. Biswas MHA, Haque MM, Mallick UK. Optimal control strategy for the immunotherapeutic treatment of HIV infection with state constraint. *Optimal Control Applications and Methods*. 2019;40(4):807-18. doi: 10.1002/oca.2516.
39. Zheltkova V, Argilaguet J, Peligero C, Bocharov G, Meyerhans A. Prediction of PD-L1 inhibition effects for HIV-infected individuals. *PLoS computational biology*. 2019;15(11):e1007401. Epub 2019/11/07. doi: 10.1371/journal.pcbi.1007401. PubMed PMID: 31693657; PubMed Central PMCID: PMC6834253.
40. Lu CL, Murakowski DK, Bournazos S, Schoofs T, Sarkar D, Halper-Stromberg A, et al. Enhanced clearance of HIV-1-infected cells by broadly neutralizing antibodies against HIV-1 in vivo. *Science (New York, NY)*. 2016;352(6288):1001-4. Epub 2016/05/21. doi: 10.1126/science.aaf1279. PubMed PMID: 27199430; PubMed Central PMCID: PMC5126967.
41. McBrien JB, Mavigner M, Franchitti L, Smith SA, White E, Tharp GK, et al. Robust and persistent reactivation of SIV and HIV by N-803 and depletion of CD8(+) cells. *Nature*. 2020;578(7793):154-9. Epub 2020/01/24. doi: 10.1038/s41586-020-1946-0. PubMed PMID: 31969705.
42. Webb GM, Molden J, Busman-Sahay K, Abdulhaqq S, Wu HL, Weber WC, et al. The human IL-15 superagonist N-803 promotes migration of virus-specific CD8+ T and NK cells to B cell follicles but does not reverse latency in ART-suppressed, SHIV-infected

- macaques. *PLoS pathogens*. 2020;16(3):e1008339. Epub 2020/03/13. doi: 10.1371/journal.ppat.1008339. PubMed PMID: 32163523.
43. Martins MA, Tully DC, Cruz MA, Power KA, Veloso de Santana MG, Bean DJ, et al. Vaccine-Induced Simian Immunodeficiency Virus-Specific CD8+ T-Cell Responses Focused on a Single Nef Epitope Select for Escape Variants Shortly after Infection. *Journal of virology*. 2015;89(21):10802-20. Epub 2015/08/21. doi: 10.1128/jvi.01440-15. PubMed PMID: 26292326; PubMed Central PMCID: PMC4621113.
44. Asquith B, Edwards CT, Lipsitch M, McLean AR. Inefficient cytotoxic T lymphocyte-mediated killing of HIV-1-infected cells in vivo. *PLoS biology*. 2006;4(4):e90. Epub 2006/03/07. doi: 10.1371/journal.pbio.0040090. PubMed PMID: 16515366; PubMed Central PMCID: PMC1395353.
45. Asquith B, McLean AR. In vivo CD8+ T cell control of immunodeficiency virus infection in humans and macaques. *Proceedings of the National Academy of Sciences of the United States of America*. 2007;104(15):6365-70. Epub 2007/04/04. doi: 10.1073/pnas.0700666104. PubMed PMID: 17404226; PubMed Central PMCID: PMC1851058.
46. Friedrich TC, Dodds EJ, Yant LJ, Vojnov L, Rudersdorf R, Cullen C, et al. Reversion of CTL escape-variant immunodeficiency viruses in vivo. *Nature medicine*. 2004;10(3):275-81. Epub 2004/02/18. doi: 10.1038/nm998. PubMed PMID: 14966520.
47. Peut V, Kent SJ. Fitness constraints on immune escape from HIV: Implications of envelope as a target for both HIV-specific T cells and antibody. *Current HIV research*. 2006;4(2):191-7. Epub 2006/04/14. doi: 10.2174/157016206776055110. PubMed PMID: 16611057.
48. Arcia D, Acevedo-Saenz L, Rugeles MT, Velilla PA. Role of CD8(+) T Cells in the Selection of HIV-1 Immune Escape Mutations. *Viral immunology*. 2017;30(1):3-12. Epub 2016/11/03. doi: 10.1089/vim.2016.0095. PubMed PMID: 27805477.
49. Choo DK, Murali-Krishna K, Anita R, Ahmed R. Homeostatic turnover of virus-specific memory CD8 T cells occurs stochastically and is independent of CD4 T cell help. *Journal of immunology (Baltimore, Md : 1950)*. 2010;185(6):3436-44. Epub 2010/08/25. doi: 10.4049/jimmunol.1001421. PubMed PMID: 20733203.
50. Hataye J, Moon JJ, Khoruts A, Reilly C, Jenkins MK. Naive and memory CD4+ T cell survival controlled by clonal abundance. *Science (New York, NY)*.

- 2006;312(5770):114-6. Epub 2006/03/04. doi: 10.1126/science.1124228. PubMed PMID: 16513943.
51. Lutz CT, Karapetyan A, Al-Attar A, Shelton BJ, Holt KJ, Tucker JH, et al. Human NK cells proliferate and die in vivo more rapidly than T cells in healthy young and elderly adults. *Journal of immunology (Baltimore, Md : 1950)*. 2011;186(8):4590-8. Epub 2011/03/16. doi: 10.4049/jimmunol.1002732. PubMed PMID: 21402893; PubMed Central PMCID: PMC3071442.
  52. Freitas AA, Rocha B. Population biology of lymphocytes: the flight for survival. *Annual review of immunology*. 2000;18:83-111. Epub 2000/06/03. doi: 10.1146/annurev.immunol.18.1.83. PubMed PMID: 10837053.
  53. Banks HT, Davidian M, Hu S, Kepler GM, Rosenberg ES. Modelling HIV immune response and validation with clinical data. *Journal of biological dynamics*. 2008;2(4):357-85. Epub 2008/01/01. doi: 10.1080/17513750701813184. PubMed PMID: 19495424; PubMed Central PMCID: PMC2689816.
  54. Jambhekar SS, Breen PJ. Extravascular routes of drug administration. *Basic Pharmacokinetics*. 2 ed: Pharmaceutical Press; 2012. p. 105-26.
  55. Fujii R, Jochems C, Tritsch SR, Wong HC, Schlom J, Hodge JW. An IL-15 superagonist/IL-15R $\alpha$  fusion complex protects and rescues NK cell-cytotoxic function from TGF- $\beta$ 1-mediated immunosuppression. *Cancer immunology, immunotherapy : CII*. 2018;67(4):675-89. Epub 2018/02/03. doi: 10.1007/s00262-018-2121-4. PubMed PMID: 29392336; PubMed Central PMCID: PMC6326360.
  56. Rosario M, Liu B, Kong L, Collins LI, Schneider SE, Chen X, et al. The IL-15-Based ALT-803 Complex Enhances Fc $\gamma$ RIIIa-Triggered NK Cell Responses and In Vivo Clearance of B Cell Lymphomas. *Clinical cancer research : an official journal of the American Association for Cancer Research*. 2016;22(3):596-608. Epub 2015/10/02. doi: 10.1158/1078-0432.ccr-15-1419. PubMed PMID: 26423796; PubMed Central PMCID: PMC4738096.
  57. Basher F, Jeng EK, Wong H, Wu J. Cooperative therapeutic anti-tumor effect of IL-15 agonist ALT-803 and co-targeting soluble NKG2D ligand sMIC. *Oncotarget*. 2016;7(1):814-30. Epub 2015/12/02. doi: 10.18632/oncotarget.6416. PubMed PMID: 26625316; PubMed Central PMCID: PMC4808035.
  58. Bailey CP, Budak-Alpdogan T, Sauter CT, Panis MM, Buyukgoz C, Jeng EK, et al. New interleukin-15 superagonist (IL-15SA) significantly enhances graft-versus-tumor activity. *Oncotarget*. 2017;8(27):44366-78. Epub 2017/06/03. doi:



- 10.18632/oncotarget.17875. PubMed PMID: 28574833; PubMed Central PMCID: PMC5546486.
59. Seber GAF, Wild CJ. Nonlinear Regression. Hoboken, NJ: John Wiley & Sons; 2003.
  60. Gadhamsetty S, Beltman JB, de Boer RJ. What do mathematical models tell us about killing rates during HIV-1 infection? *Immunology letters*. 2015;168(1):1-6. Epub 2015/08/19. doi: 10.1016/j.imlet.2015.07.009. PubMed PMID: 26279491.
  61. Jin X, Bauer DE, Tuttleton SE, Lewin S, Gettie A, Blanchard J, et al. Dramatic rise in plasma viremia after CD8(+) T cell depletion in simian immunodeficiency virus-infected macaques. *The Journal of experimental medicine*. 1999;189(6):991-8. Epub 1999/03/17. doi: 10.1084/jem.189.6.991. PubMed PMID: 10075982; PubMed Central PMCID: PMC2193038.
  62. Choi EI, Reimann KA, Letvin NL. In vivo natural killer cell depletion during primary simian immunodeficiency virus infection in rhesus monkeys. *Journal of virology*. 2008;82(13):6758-61. Epub 2008/04/25. doi: 10.1128/jvi.02277-07. PubMed PMID: 18434394; PubMed Central PMCID: PMC2447079.
  63. De Boer RJ, Mohri H, Ho DD, Perelson AS. Turnover rates of B cells, T cells, and NK cells in simian immunodeficiency virus-infected and uninfected rhesus macaques. *Journal of immunology (Baltimore, Md : 1950)*. 2003;170(5):2479-87. Epub 2003/02/21. doi: 10.4049/jimmunol.170.5.2479. PubMed PMID: 12594273.
  64. Han KP, Zhu X, Liu B, Jeng E, Kong L, Yovandich JL, et al. IL-15:IL-15 receptor alpha superagonist complex: high-level co-expression in recombinant mammalian cells, purification and characterization. *Cytokine*. 2011;56(3):804-10. Epub 2011/10/25. doi: 10.1016/j.cyto.2011.09.028. PubMed PMID: 22019703; PubMed Central PMCID: PMC3221918.
  65. Davenport MP, Ribeiro RM, Perelson AS. Kinetics of virus-specific CD8+ T cells and the control of human immunodeficiency virus infection. *Journal of virology*. 2004;78(18):10096-103. Epub 2004/08/28. doi: 10.1128/jvi.78.18.10096-10103.2004. PubMed PMID: 15331742; PubMed Central PMCID: PMC515020.
  66. Vousden WD, Farr WM, Mandel I. Dynamic temperature selection for parallel tempering in Markov chain Monte Carlo simulations. *Monthly Notices of the Royal Astronomical Society*. 2015;455(2):1919-37. doi: 10.1093/mnras/stv2422.
  67. Stapor P, Weindl D, Ballnus B, Hug S, Loos C, Fiedler A, et al. PESTO: Parameter Estimation TOolbox. *Bioinformatics (Oxford, England)*. 2018;34(4):705-7. Epub



- 2017/10/27. doi: 10.1093/bioinformatics/btx676. PubMed PMID: 29069312; PubMed Central PMCID: PMC5860618.
68. Bedrick EJ, Tsai C-L. Model Selection for Multivariate Regression in Small Samples. *Biometrics*. 1994;50(1):226-31. doi: 10.2307/2533213. PubMed PMID: NA.
69. Weninger W, Crowley MA, Manjunath N, von Andrian UH. Migratory properties of naive, effector, and memory CD8(+) T cells. *The Journal of experimental medicine*. 2001;194(7):953-66. Epub 2001/10/03. doi: 10.1084/jem.194.7.953. PubMed PMID: 11581317; PubMed Central PMCID: PMC2193483.
70. Velu V, Titanji K, Zhu B, Husain S, Pladevega A, Lai L, et al. Enhancing SIV-specific immunity in vivo by PD-1 blockade. *Nature*. 2009;458(7235):206-10. Epub 2008/12/17. doi: 10.1038/nature07662. PubMed PMID: 19078956; PubMed Central PMCID: PMC2753387.
71. Dyavar Shetty R, Velu V, Titanji K, Bosinger SE, Freeman GJ, Silvestri G, et al. PD-1 blockade during chronic SIV infection reduces hyperimmune activation and microbial translocation in rhesus macaques. *The Journal of clinical investigation*. 2012;122(5):1712-6. Epub 2012/04/24. doi: 10.1172/jci60612. PubMed PMID: 22523065; PubMed Central PMCID: PMC3336983.
72. Gay CL, Bosch RJ, Ritz J, Hataye JM, Aga E, Tressler RL, et al. Clinical Trial of the Anti-PD-L1 Antibody BMS-936559 in HIV-1 Infected Participants on Suppressive Antiretroviral Therapy. *The Journal of infectious diseases*. 2017;215(11):1725-33. Epub 2017/04/22. doi: 10.1093/infdis/jix191. PubMed PMID: 28431010; PubMed Central PMCID: PMC5790148.
73. Jochems C, Tritsch SR, Knudson KM, Gameiro SR, Rumfield CS, Pellom ST, et al. The multi-functionality of N-809, a novel fusion protein encompassing anti-PD-L1 and the IL-15 superagonist fusion complex. *Oncoimmunology*. 2019;8(2):e1532764. Epub 2019/02/05. doi: 10.1080/2162402x.2018.1532764. PubMed PMID: 30713787; PubMed Central PMCID: PMC6343815.
74. Harris M, Burns CM, Becker EA, Braasch AT, Gostick E, Johnson RC, et al. Acute-phase CD8 T cell responses that select for escape variants are needed to control live attenuated simian immunodeficiency virus. *Journal of virology*. 2013;87(16):9353-64. Epub 2013/06/21. doi: 10.1128/jvi.00909-13. PubMed PMID: 23785211; PubMed Central PMCID: PMC3754066.
75. Burwitz BJ, Sacha JB, Reed JS, Newman LP, Norante FA, Bimber BN, et al. Pyrosequencing reveals restricted patterns of CD8+ T cell escape-associated

- compensatory mutations in simian immunodeficiency virus. *Journal of virology*. 2011;85(24):13088-96. Epub 2011/10/14. doi: 10.1128/jvi.05650-11. PubMed PMID: 21994463; PubMed Central PMCID: PMC3233179.
76. Fantini M, David JM, Wong HC, Annunziata CM, Arlen PM, Tsang KY. An IL-15 Superagonist, ALT-803, Enhances Antibody-Dependent Cell-Mediated Cytotoxicity Elicited by the Monoclonal Antibody NEO-201 Against Human Carcinoma Cells. *Cancer biotherapy & radiopharmaceuticals*. 2019;34(3):147-59. Epub 2019/01/03. doi: 10.1089/cbr.2018.2628. PubMed PMID: 30601063; PubMed Central PMCID: PMC6482908.
77. Borducchi EN, Cabral C, Stephenson KE, Liu J, Abbink P, Ng'ang'a D, et al. Ad26/MVA therapeutic vaccination with TLR7 stimulation in SIV-infected rhesus monkeys. *Nature*. 2016;540(7632):284-7. Epub 2016/11/15. doi: 10.1038/nature20583. PubMed PMID: 27841870; PubMed Central PMCID: PMC5145754.
78. Borducchi EN, Liu J, Nkolola JP, Cadena AM, Yu WH, Fischinger S, et al. Antibody and TLR7 agonist delay viral rebound in SHIV-infected monkeys. *Nature*. 2018;563(7731):360-4. Epub 2018/10/05. doi: 10.1038/s41586-018-0600-6. PubMed PMID: 30283138; PubMed Central PMCID: PMC6237629.
79. Jones RB, Mueller S, O'Connor R, Rimpel K, Sloan DD, Karel D, et al. A Subset of Latency-Reversing Agents Expose HIV-Infected Resting CD4+ T-Cells to Recognition by Cytotoxic T-Lymphocytes. *PLoS pathogens*. 2016;12(4):e1005545. Epub 2016/04/16. doi: 10.1371/journal.ppat.1005545. PubMed PMID: 27082643; PubMed Central PMCID: PMC4833318.
80. Melkova Z, Shankaran P, Madlenakova M, Bodor J. Current views on HIV-1 latency, persistence, and cure. *Folia microbiologica*. 2017;62(1):73-87. Epub 2016/10/07. doi: 10.1007/s12223-016-0474-7. PubMed PMID: 27709447.
81. Pankrac J, Klein K, Mann JFS. Eradication of HIV-1 latent reservoirs through therapeutic vaccination. *AIDS research and therapy*. 2017;14(1):45. Epub 2017/09/13. doi: 10.1186/s12981-017-0177-4. PubMed PMID: 28893280; PubMed Central PMCID: PMC5594457.
82. Salemi M, Rife B. Phylogenetics and Phyloanatomy of HIV/SIV Intra-Host Compartments and Reservoirs: The Key Role of the Central Nervous System. *Current HIV research*. 2016;14(2):110-20. Epub 2015/10/30. PubMed PMID: 26511341.
83. Bronnimann MP, Skinner PJ, Connick E. The B-Cell Follicle in HIV Infection: Barrier to a Cure. *Frontiers in immunology*. 2018;9:20. Epub 2018/02/10. doi:

- 10.3389/fimmu.2018.00020. PubMed PMID: 29422894; PubMed Central PMCID: PMC5788973.
84. Fromentin R, DaFonseca S, Costiniuk CT, El-Far M, Procopio FA, Hecht FM, et al. PD-1 blockade potentiates HIV latency reversal ex vivo in CD4(+) T cells from ART-suppressed individuals. *Nature communications*. 2019;10(1):814. Epub 2019/02/20. doi: 10.1038/s41467-019-08798-7. PubMed PMID: 30778080; PubMed Central PMCID: PMC6379401 pembrolizumab. S.G.D. has received grant support from Gilead, Merck, and ViiV. He has consulted from AbbVie, Janssen and Shionogi. He is a member of the scientific advisory boards for Enochian Biosciences and BryoLogyx. N.C. has received grant support from Merck. The remaining authors declare no competing interests.
85. Loffredo JT, Maxwell J, Qi Y, Glidden CE, Borchardt GJ, Soma T, et al. Mamu-B\*08-positive macaques control simian immunodeficiency virus replication. *Journal of virology*. 2007;81(16):8827-32. Epub 2007/06/01. doi: 10.1128/jvi.00895-07. PubMed PMID: 17537848; PubMed Central PMCID: PMC1951344.
86. Yant LJ, Friedrich TC, Johnson RC, May GE, Maness NJ, Enz AM, et al. The high-frequency major histocompatibility complex class I allele Mamu-B\*17 is associated with control of simian immunodeficiency virus SIVmac239 replication. *Journal of virology*. 2006;80(10):5074-7. Epub 2006/04/28. doi: 10.1128/jvi.80.10.5074-5077.2006. PubMed PMID: 16641299; PubMed Central PMCID: PMC1472056.
87. Nguyen S, Deleage C, Darko S, Ransier A, Truong DP, Agarwal D, et al. Elite control of HIV is associated with distinct functional and transcriptional signatures in lymphoid tissue CD8(+) T cells. *Science translational medicine*. 2019;11(523). Epub 2019/12/20. doi: 10.1126/scitranslmed.aax4077. PubMed PMID: 31852798.

## Supporting information

**Appendix S1.** Document containing additional methodological details and discussion, along with results and discussion of global sensitivity analysis and individual fitting.

**Data S1.** Spreadsheet containing model generated data used to create Figs 3-8 and Figs S2-S5, along with experimental data used to train models and resulting parameter values (Fig S1).

**Data S2.** Spreadsheet containing model generated data used to create figures in Appendix S1 and parameter values obtained from individual fitting.

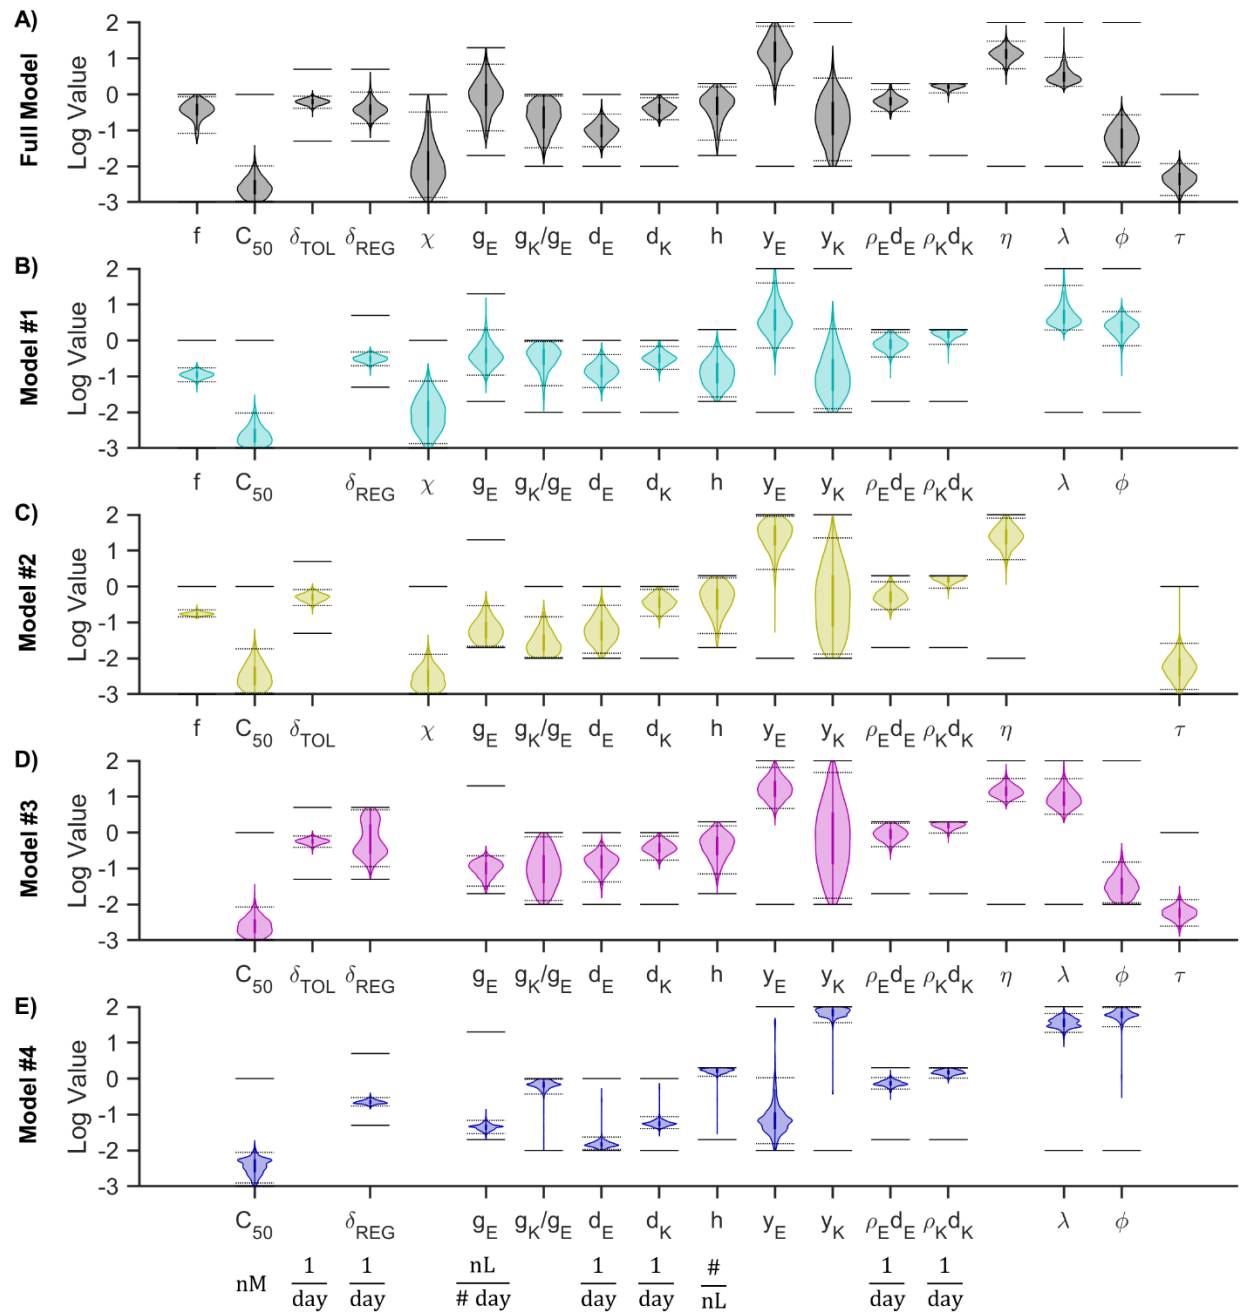

**Fig S1. Sampled parameter distributions.** Panels (A-E) show the Bayesian MCMC sample of the posterior distributions of parameter values for the full model and for models #1-4 on a logarithmic scale. Bayesian 95% credible intervals are shown as dotted lines. Allowed parameter ranges (from Table 3) are shown as solid lines. Note that some units of measurement (shown below panel E) are different from those in Table 3.

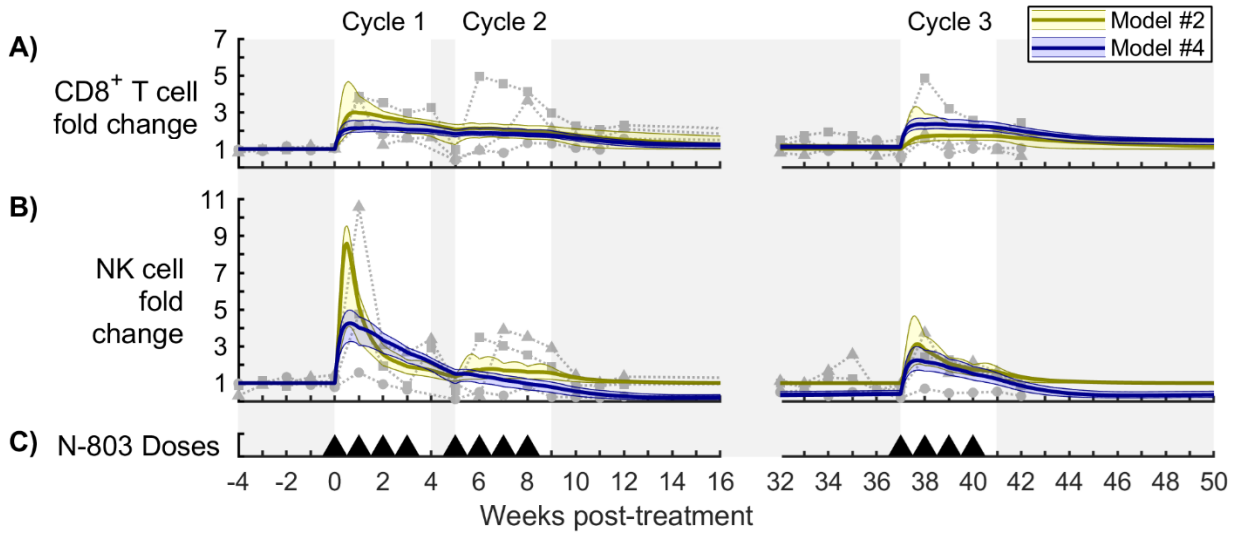

**Fig S2. Model comparison for cytotoxic cells (Models #2 and #4).** Panels (A,B) show fold change in CD8<sup>+</sup> T cells and NK cells in the peripheral blood, respectively, for the model without immune regulation (yellow model #2) and the model without drug tolerance or viral escape (blue model #4). The bold line corresponds to the best-fit model, and the shaded region corresponds to the Bayesian 95% credible interval. See Figure S1 for corresponding parameter distributions. Data from N-803-treated SIV-infected NHPs are shown as different symbols for each NHP [16]. Panel (C) shows timing of 0.1 mg/kg subcutaneous doses of N-803.

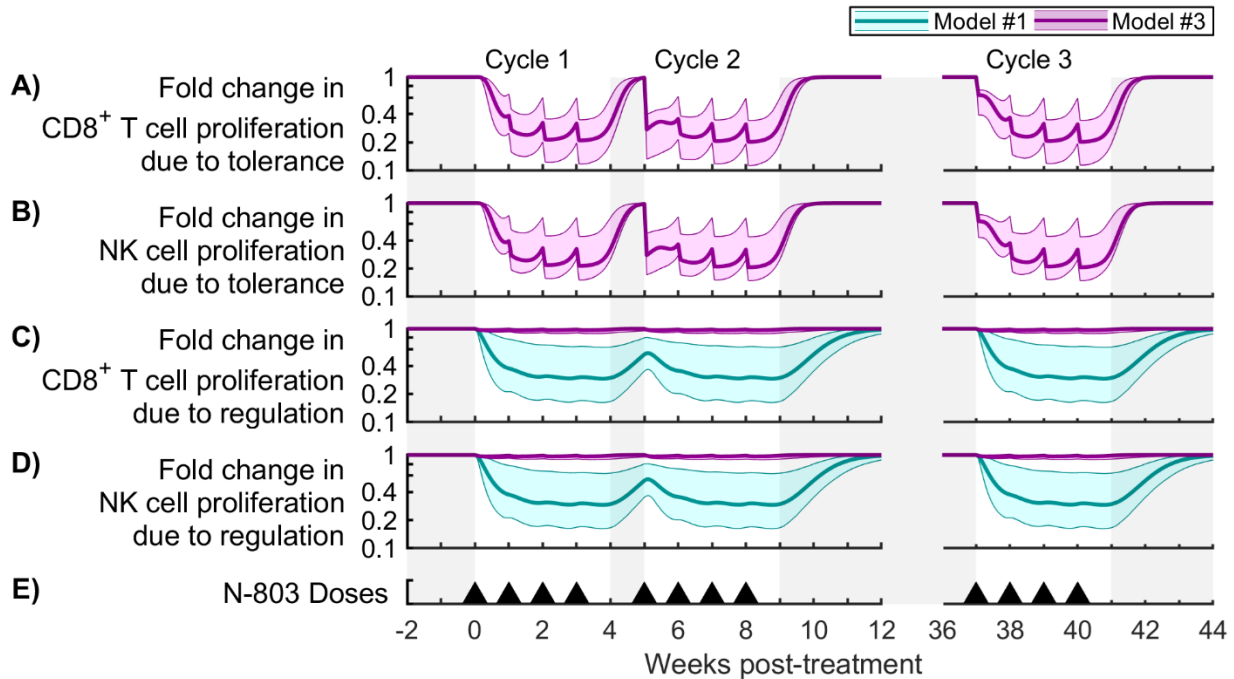

**Fig S3. Contributions of drug tolerance and immune regulation to cytotoxic cell proliferation.** Shown are measures of mechanism contribution to CD8<sup>+</sup> T cell and NK cell proliferation for the model with immune regulation and viral escape (cyan model #1) and the model with immune regulation and drug tolerance (purple model #3). Panels (A,B) show the fold change in CD8<sup>+</sup> T cell proliferation and NK cell proliferation due to tolerance (Eq. 30). Panels (C,D) show the fold change in CD8<sup>+</sup> T cell proliferation and NK cell proliferation due to regulation (Eq. 29). The bold line corresponds to the best-fit model, and the shaded region corresponds to the Bayesian 95% credible interval. See Figure S1 for corresponding parameter distributions. Panel (E) shows timing of 0.1 mg/kg subcutaneous doses of N-803.

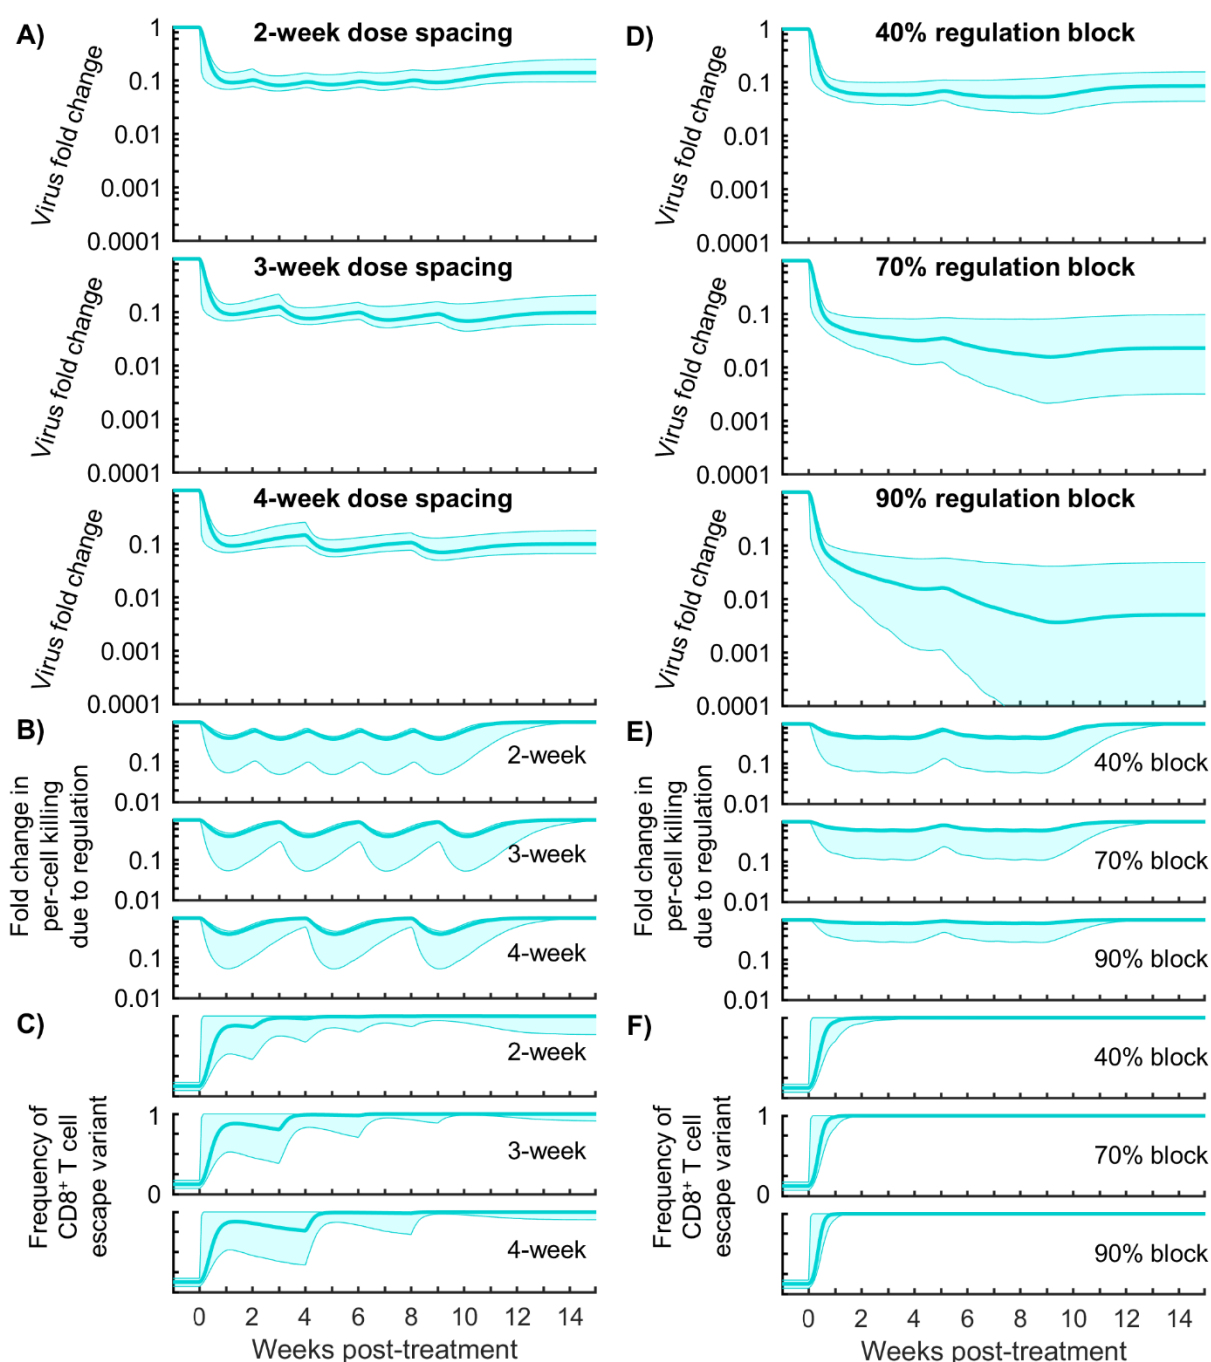

**Fig S4. Sample time courses for N-803 regimen changes for model #1.** Panels (A-C) show the results of changing the N-803 dosing frequency for the model with immune regulation and viral escape (model #1). Panel (A) shows the fold change in viral load corresponding to the 0.1 mg/kg subcutaneous dosing regimens with 2-, 3-, and 4-week dosing. Panel (B) shows the corresponding fold changes in per-cell killing due to regulation (Eq. 25). Panel (C) shows the corresponding changes in the frequency of the CD8<sup>+</sup> T cell escape variant. Panels (D-F) show the response of model #1 to the 1-week dosing regimen (Fig 2) delivered along with regulatory blockade (simulated by 40, 70, and 90% reduction of killing regulation parameter  $\lambda$ ). The bold line corresponds to the best-fit model, and the shaded region corresponds to the Bayesian 95% credible interval.



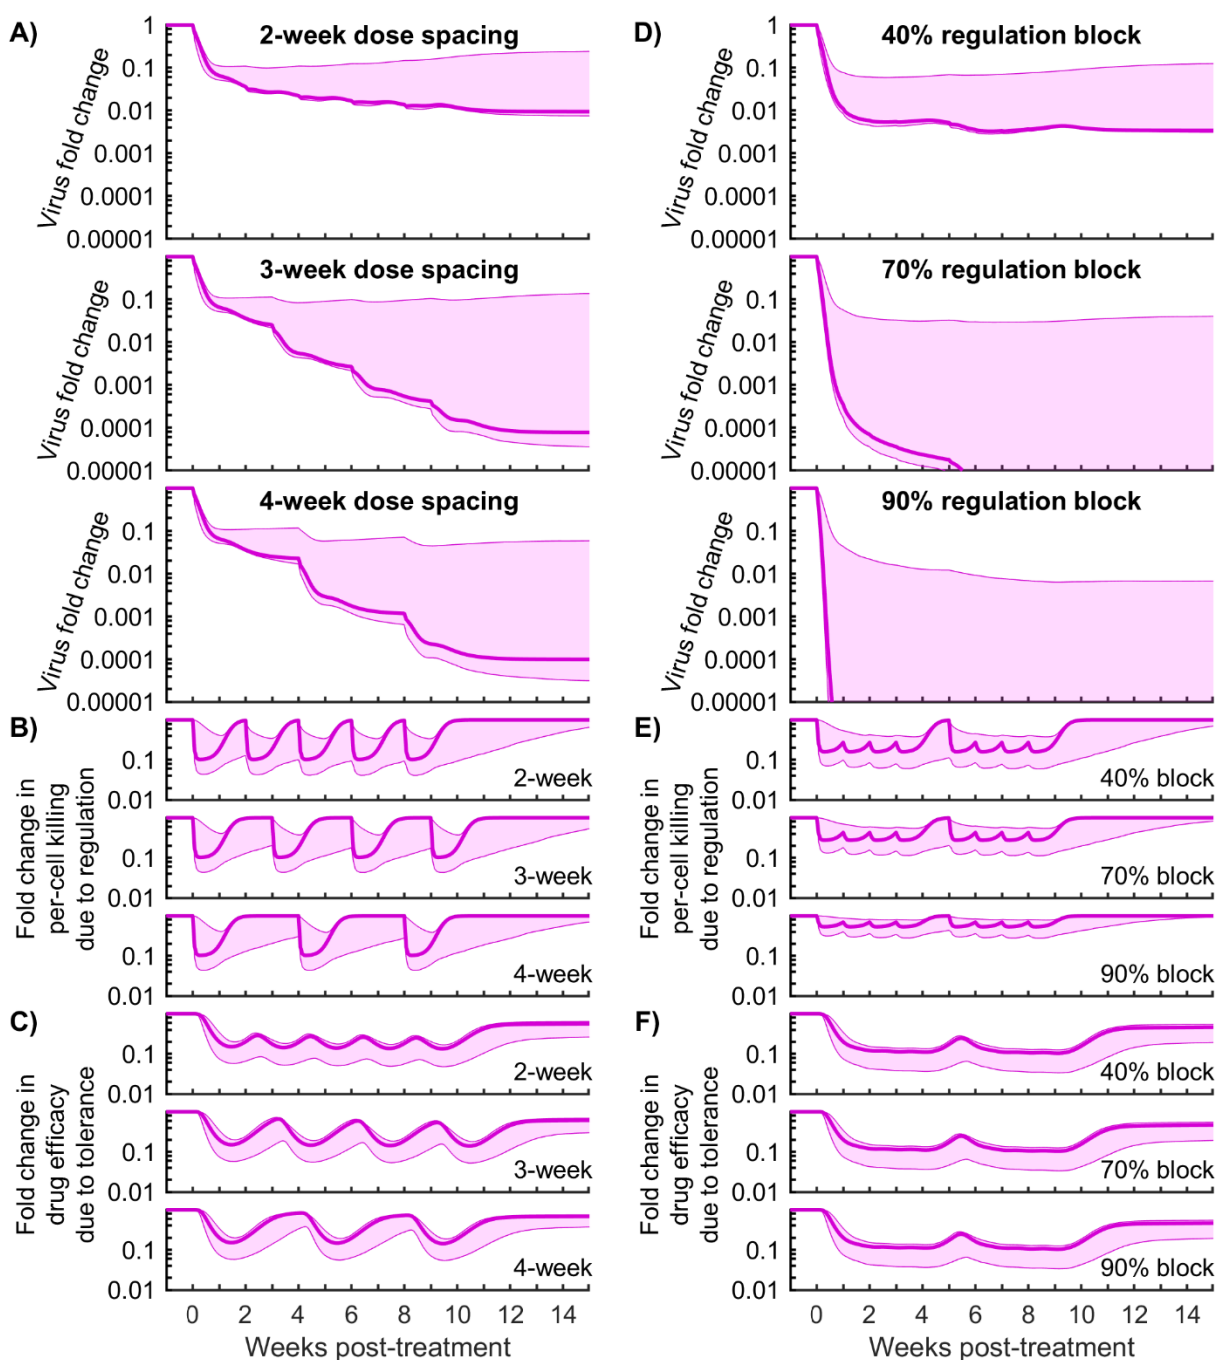

**Fig S5. Sample time courses for N-803 regimen changes for model #3.** Panels (A-C) show the results of changing the N-803 dosing frequency for the model with immune regulation and drug tolerance (model #3). Panel (A) shows the fold change in viral load corresponding to the 0.1 mg/kg subcutaneous dosing regimens with 2-, 3-, and 4-week dosing. Panel (B) shows the corresponding fold changes in per-cell killing due to regulation (Eq. 25). Panel (C) shows the corresponding fold changes in drug efficacy due to tolerance (Eq. 24). Panels (D-F) show the response of model #3 to the 1-week dosing regimen (Fig 2) delivered along with regulatory blockade (simulated by 40, 70, and 90% reduction of killing regulation parameter  $\lambda$ ). The bold line corresponds to the best-fit model, and the shaded region corresponds to the Bayesian 95% credible interval.

# Mathematical modeling of N-803 treatment in SIV-infected non-human primates: Appendix S1

|                                                           |    |
|-----------------------------------------------------------|----|
| Supplemental Methods .....                                | 2  |
| Model assumptions.....                                    | 2  |
| Parameter space .....                                     | 3  |
| Parameter estimation algorithm .....                      | 4  |
| Model comparison criteria.....                            | 4  |
| Per-cell killing derivation .....                         | 5  |
| Significance testing.....                                 | 6  |
| Sensitivity analysis .....                                | 6  |
| Supplemental Results .....                                | 8  |
| Discussion of sensitivity analysis .....                  | 8  |
| Comparison to IL-15 receptors and inhibitory markers..... | 10 |
| Model with long-term immune regulation .....              | 12 |
| Individual Fitting .....                                  | 14 |
| References .....                                          | 27 |

## Supplemental Methods

### Model assumptions

The following is a discussion of noteworthy assumptions in the model (Eq. 1-14 in the main text). Healthy target cells are assumed constant, which follows from two considerations. First, it was observed that total peripheral blood CD4<sup>+</sup> T cells remained approximately constant during the N-803 treatment under consideration [1]. Second, during chronic HIV infection, only about ~2% of HIV-infected cells are replication-competent [2]. Taken together, these support the assumption that the healthy CD4<sup>+</sup> T cells remained approximately constant over the time periods under consideration in this work.

A quasi-steady-state for virions relative to infected CD4<sup>+</sup> T cells was assumed. Both HIV and SIV are cleared quickly from the plasma, with a virion half-life on the order of minutes [3-5]. Therefore, any delay between changes in infected cells and changes in virions was on a much shorter timescale than the dynamics of the observed system. The quasi-steady state implies that virions are approximately proportional to infected cells (i.e.  $V \approx kI_V$  and  $W \approx kI_W$ ) and allows model parameters to be calibrated to experimentally measured changes in viral load. The assumptions of constant target cells and quasi-steady-state of the free virus relative to infected cells have been used together in models of HIV treatment [6, 7].

**Cell types and activation.** We convolved all CD8<sup>+</sup> T cells into one variable ( $E$ ), and we convolved all NK cells into another variable ( $K$ ). Killing rate constants ( $g_E, g_K$ ) were applied to each of these total populations. Modifications to killing rate via drug stimulation, drug tolerance, and immune regulation (Eq. 7,8) represented changes in both the frequency of cytotoxicity active cells within their respective total populations and changes in the individual efficacy cytotoxicity active cells. We also neglect any delay between changes in antigen-dependent memory CD8<sup>+</sup> T cell activation and changes in the overall killing rate, based on multiple considerations. First, chronic infections such as SIV include persistent CD8<sup>+</sup> T cell activation. Second, memory CD8<sup>+</sup> T cells acquire cytotoxic effector functions within 24 hours after antigen stimulation [8, 9]. Third, IL-15 promotes bystander activation of CD8<sup>+</sup> T cells [10-12]. Such cells were capable of non-specific cytotoxicity of hepatitis-A-infected cells in a manner similar to NK cells [13].

**Immune regulation and drug tolerance.** We employ phenomenological representations of immune regulation and drug tolerance, with the two mechanisms being distinguished by their effect and their dynamics. Immune regulation directly reduces rates of killing and proliferation for

CD8<sup>+</sup> T cells and NK cells (via  $\lambda, \varphi$ ), while drug tolerance inhibits N-803 stimulation of these processes (via  $\eta$ ). Both the generation and decay of the immune regulatory signal is governed by a single parameter ( $\delta_{\text{REG}}$ ), while drug tolerance is governed by two parameters ( $\delta_{\text{TOL}}, \tau$ ). The tolerance recovery parameter ( $\tau$ ) allows drug tolerance to persist across long gaps in treatment, while immune regulation cannot persist long-term. We make no assumptions as to the sources of immune regulation or drug tolerance. For example, IL-15 receptor expression (modeled by drug tolerance) can be modulated by a variety of signals. CD122 expression is increased following antigen stimulation [14-16], while IL-6 can inhibit the upregulation of CD122 in follicular helper T cells [17]. IL-15 increased CD122 expression in memory CD8<sup>+</sup> T cells of NHPs [18]. In our data, a transient increase in CD122 was also observed in effector memory CD8<sup>+</sup> T cells during the first few weeks of treatment [1]. The effect of native cytokine signaling, including IL-15, is convolved into rate constants (e.g.  $g_E, g_K, d_E, d_K$ ). We also convolve the effect of receptor levels on native cytokine activity into drug stimulation, immune regulation, and drug tolerance terms (Eq. 7-8).

## Parameter space

The following is a discussion of the fixed parameters in Table 3. Initial conditions for SIV plasma viral load, CD8<sup>+</sup> T cells, and NK cells, where the respective means of pre-treatment data across all 3 subjects (15 samples total for each species) [1]. Initial N-803 at the absorption site was based on measured N-803 molecular weight of 114 kDa [19] and the administered dose of 0.1 mg/kg [1]. The N-803 absorption rate constant ( $k_a$ ) was obtained from the elimination phase of the plasma pharmacokinetics following a 10  $\mu\text{g}/\text{kg}$  subcutaneous dose in humans participating in cancer trials [20]. N-803 clearance rate constant ( $k_e$ ) was obtained from the half-life ( $7.97 \pm 1.29$  h) reported following a 0.1 mg/kg intravenous dose in cynomolgus macaques [21]. The ratio of the N-803 volume of distribution and bioavailability ( $v_d/F$ ) was obtained from the volume of distribution ( $37.56 \pm 9.1$  mL/kg) reported for a 0.1 mg/kg intravenous dose in cynomolgus macaques [21] and the bioavailability ( $0.0299 \pm 0.0160$ ) reported for a 10  $\mu\text{g}/\text{kg}$  subcutaneous dose in humans [20]. The number of tolerance variables ( $N$ ) and number of regulation variables ( $M$ ) were chosen to reflect dynamics of N-803 receptors CD122 and CD132 and inhibitory markers CD39 and PD-1, respectively, on CD8<sup>+</sup> T cells and NK cells [1]. The number of tolerance variables ( $N$ ) was higher to reflect the delay in receptor changes with respect to inhibitory marker changes.

The following is a discussion of the fitted parameters in Table 3. The N-803 50% effect concentration ( $C_{50}$ ) was based on the ex vivo 50% effect concentration for CD8<sup>+</sup> T cells and NK cells in rhesus macaques (estimated as 10-1000 pM from figure) [22]. The lower limit was then

adjusted to account for the possibility of higher concentrations of N-803 in the lymph tissue relative to the blood, as evidenced by murine tissue biodistribution data [21]. The CD8<sup>+</sup> T cell killing rate constant ( $g_E$ ) was based on the range of estimates of total HIV-infected cell death rate due to CD8<sup>+</sup> T cells (reviewed in [23]) and peripheral blood concentration of ~500 CD8<sup>+</sup> T cells per  $\mu\text{L}$  (used as initial condition). NK cell killing rate constant ( $g_K$ ) was assumed to be some fraction of CD8<sup>+</sup> T cell killing rate based on comparison of viral load after CD8 depletion (elimination of CD8<sup>+</sup> T cells and NK cells) [24] and CD16 depletion (elimination of NK cell cytotoxic subgroup) [25]. The cell death rate constants ( $d_E, d_K$ ) were based on CD8<sup>+</sup> T cell and NK cell turnover in SIV-infected rhesus macaques [26]. The upper limits were increased to fit the rate of contraction following N-803 observed in the NHP data [1]. Thus, the value incorporates changes in survival signals due to N-803 treatment and immune regulation. Proliferation stimulation factors ( $\rho_E, \rho_K$ ) were limited according to maximum allowed expansion rates ( $\rho_E \cdot d_E, \rho_K \cdot d_K$ ). These rates were derived from Eq. (3-4,7-8) by assuming  $h \gg [E],[K]$ . The maximum expansion rates are limited based on CD8<sup>+</sup> T cell clonal expansion rate for rhesus macaques (~1/day) [27].

### Parameter estimation algorithm

We calibrated the model using a multi-start local search approach implemented in MATLAB version R2018b (Mathworks). The parameter space (Table 3) was sampled on a logarithmic scale via Latin hypercube sampling [28] using the MATLAB 'lhsdesign' function (10,000 samples). Each sample set of parameter values was used as an initial guess in an interior-point optimization algorithm [29] implemented by the MATLAB 'fmincon' function. This algorithm, also operating on the logarithmic parameter values, returned a local minimum of the negative loglikelihood (Eq. 20) with respect to the log-fold change in virus, fold change in CD8<sup>+</sup> T cells, and fold change in NK cells in all three subjects. Some viral data points lay on the lower limit of detection for the viral assay and were omitted from the likelihood function. Parameters sets associated with the highest likelihood were used to instantiate a Markov Chain Monte Carlo algorithm to generate a sample of parameter values from posterior distributions.

### Model comparison criteria

We also considered qualitative observations of the viral data that should be present in a suitable model, which were quantified as follows. First, there was a viral rebound in treatment cycle 1 (Fig 4I). This was represented by the difference in the viral load at the end of cycle 1 (week 4) and the minimum viral load in week 4 (Eq. S1). In these equations,  $V$  stands for total virus ( $V+W$ ).

$$\text{Criteria (I)} = \log V(4) - \log \min(V(0 : 4)) \quad (\text{S1})$$

Second, the viral response in cycle 2 was weaker than that in cycle 3 (Fig 4J). This was quantified by the difference in viral load drops between the two cycles (Eq. S2).

$$\text{Criteria (J)} = [\log V(37) - \log \min(V(37 : 41))] - [\log V(5) - \log \min(V(5 : 9))] \quad (\text{S2})$$

Third, the response in cycle 3 was weaker than that in cycle 1 (Fig 4K). This was defined as above (Eq. S3).

$$\text{Criteria (J)} = [\log V(0) - \log \min(V(0 : 4))] - [\log V(37) - \log \min(V(37 : 41))] \quad (\text{S3})$$

### Per-cell killing derivation

In order to quantify the effect of immune regulation, drug tolerance, and viral escape on per-cell cytotoxic activity, we defined per-cell killing (PCK). The following is a derivation of the expression for per-cell killing (PCK). To begin, the rates of change for each viral variant can be added together to describe the rate of change of the total virus (Eq. S4).

$$[V]' + [W]' = q_v [V] + q_w [W] - g_E [E]([V] + \chi [W]) - g_K [K]([V] + [W]) \quad (\text{S4})$$

We next introduce  $v$ ,  $w$ ,  $e$ ,  $k$  as frequencies of virus or killer cells within their respective groups (e.g.  $[v] = [V]/([V] + [W])$  or  $[e] = [E]/([E] + [K])$ ). Collecting terms in Eq. (S5) results in an expression that applies to the sum of CD8<sup>+</sup> T cells and NK cells and the sum of both viral variants .

$$[V + W]' = (q_v [v] + q_w [w])[V + W] - \{([v] + \chi [w])g_E [e] - g_K [k]\}[E + K][V + W] \quad (\text{S5})$$

There is a collection of terms that behaves the same way as killing rate constants ( $g_E, g_K$ ) in Eq. (1,2). This expression is the per-cell killing (PCK) absent N-803 intervention (Eq. S6).

$$\text{PCK} = \frac{[\text{total killing rate}]}{[\text{killer cells}][\text{virus}]} = ([v] + \chi [w])g_E [e] - g_K [k] \quad (\text{S6})$$

Supplementing this with changes in killing rate due to N-803 stimulation, drug tolerance, and immune regulation (Eq. 7 in main text) results in the expression for PCK during N-803 treatment (Eq. S7-S9 or Eq. 22-24 in the main text).

$$\text{PCK} = \frac{[\text{total killing rate}]}{[\text{killer cells}][\text{virus}]} = \frac{([v] + \chi [w])g_E (1 + \gamma_E [\Theta][\Omega])[e] + g_K (1 + \gamma_K [\Theta][\Omega])[k]}{1 + \lambda [\text{REG}_M]} \quad (\text{S7})$$

$$[\Theta] = \left( \frac{[C]}{C_{50} + [C]} \right) \quad (\text{S8})$$

$$[\Omega] = \left( \frac{1}{1 + \eta ([\text{TOL}_{N-1}] + [\text{TOL}_N])} \right) \quad (\text{S9})$$

## Significance testing

Statistical comparison of the quality criteria between models (Fig 5I-K) was done in MATLAB version R2018b (Mathworks) using the Tukey test. Statistical comparison of the results of treatment exploration (Fig 8) was conducted in GraphPad Prism 8. Separate analyses were conducted for changes due to dose spacing (Fig 8A) and for changes due to regulation blockade (Fig 8B), but the same technique was used. For example, this was a two-way ANOVA incorporating the model (#1 vs #3) and the dose spacing (2-4 weeks). Data points were matched by model parameter set, employing the Geisser-Greenhouse correction for non-sphericity. Thus, we treated the results from each parameter as though they had come from the same subject in a longitudinal study. The Tukey test for multiple comparisons was conducted to test the statistical significance of the difference of means between each dose spacing. In addition, one-sample t-test was used to assess if each result was different than zero (zero being the case where there was no improvement with respect to the control regimen).

## Sensitivity analysis

A sensitivity analysis was conducted to quantify the correlations between model parameters and the treatment efficacy over multiple timescales in the full model. As a measure of treatment efficacy, we considered the drop in viral load for each treatment cycle (Fig S6). This was defined as the difference between the viral load at the start of the cycle (e.g. viral load at week 0) and the minimum viral load across that cycle (e.g. minimum viral load between week 0 and week 4). We used partial rank correlation coefficients (PRCC) calculated via the MATLAB 'partialcorr' function [30]. A Latin hypercube sample of 10,000 parameter sets was generated from a wide parameter space (Table S1). The model was evaluated at each parameter set, and PRCC were calculated between each parameter and the viral load drop for each of the three treatment cycles. Correlations that were significant at  $\alpha=0.0001$  across three repetitions of 10,000 samples were considered valid.



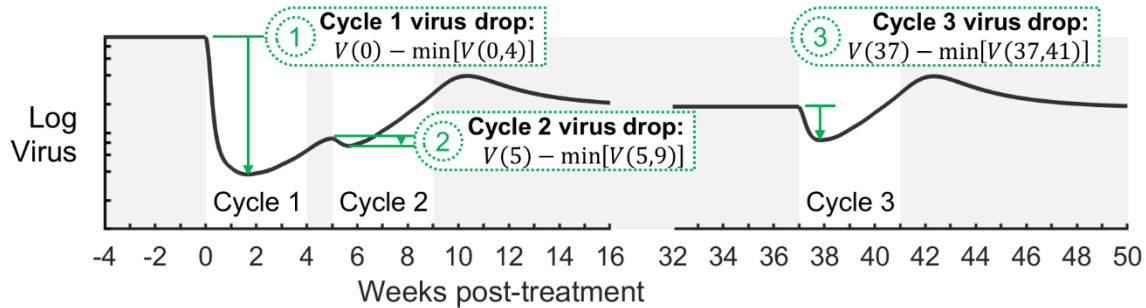

**Fig S6. Metrics for N-803 treatment efficacy considered during sensitivity analysis.** The drop in viral load during each treatment cycle (1,2,3) was used as a measure of treatment efficacy. The viral load drop is defined as the difference between the viral load at the start of the cycle (e.g. viral load at week 0) and the minimum viral load across that cycle (e.g. minimum viral load between week 0 and week 4). Each metric is highlighted using a representative viral trajectory.

**Table S1. Model parameters varied during sensitivity analysis.**

| Parameter                                                | Symbol         | Range               | Units                         |
|----------------------------------------------------------|----------------|---------------------|-------------------------------|
| N-803 50% effect concentration                           | $C_{50}$       | (0.4, 40)           | pM                            |
| Tolerance rate constant                                  | $\delta_{TOL}$ | (0.05, 5)           | /day                          |
| Regulation rate constant                                 | $\delta_{REG}$ | (0.05, 5)           | /day                          |
| Tolerance recovery                                       | $\tau$         | (0.001, 1)          |                               |
| Escape variant initial frequency                         | $f$            | (0.001, 1)          |                               |
| Escape variant susceptibility factor                     | $\chi$         | (0.001, 1)          |                               |
| CD8 <sup>+</sup> T cell death rate constant              | $d_E$          | (0.01, 1)           | /day                          |
| NK cell death rate constant                              | $d_K$          | (0.01, 1)           | /day                          |
| CD8 <sup>+</sup> T cell killing rate constant            | $g_E$          | ( $10^{-5}$ , 0.01) | $\mu\text{L}/\#\cdot\text{d}$ |
| NK cell killing rate constant                            | $g_K$          | ( $10^{-5}$ , 0.01) | $\mu\text{L}/\#\cdot\text{d}$ |
| Maximum proliferating cells                              | $h$            | (50, 5000)          | $\#/\mu\text{L}$              |
| CD8 <sup>+</sup> T cell proliferation stimulation factor | $\rho_E$       | (0.1, 10)           |                               |
| NK cell proliferation stimulation factor                 | $\rho_K$       | (0.1, 10)           |                               |
| CD8 <sup>+</sup> T cell killing stimulation factor       | $\gamma_E$     | (0.01, 100)         |                               |
| NK cell killing stimulation factor                       | $\gamma_K$     | (0.01, 100)         |                               |
| Tolerance effect factor                                  | $\eta$         | (0.01, 100)         |                               |
| Proliferation regulation factor                          | $\varphi$      | (0.1, 10)           |                               |
| Killing regulation factor                                | $\lambda$      | (0.01, 100)         |                               |

Shown are the allowed ranges for parameter values during sensitivity analysis. Parameters were sampled logarithmically from the given ranges via Latin hypercube sampling [28]. Parameters not shown were fixed (Table 3).

## Supplemental Results

### Discussion of sensitivity analysis

To assess the relative impact of each treatment response mechanism on viral responses, we performed global sensitivity analysis. This analysis correlates changes in parameter values to changes in model outputs in the context of other parameter influences. We calculated the partial rank correlations coefficients (PRCCs) (Table S2) between model parameters and model outputs of interest. The parameters of interest are those governing drug tolerance, immune regulation, and viral escape. The outputs of interest are the viral load drop during each treatment cycle which we use as a metric of treatment efficacy in each cycle (Fig S6).

Parameters governing immune regulation had strong correlations with treatment efficacy. Strong killing regulation (i.e. high  $\lambda$ ) is associated with low efficacy (small viral drop) in all three cycles, having the strongest impact in cycle 1. Strong proliferation regulation (i.e. high  $\varphi$ ) correlates with lower efficacy (smaller viral drop) in cycle 2, reflecting the delay that comes from acting on viral load indirectly through suppressing CD8<sup>+</sup> T cell and NK cell population expansion. A fast regulatory response (i.e. high  $\delta_{\text{REG}}$ ) correlated with lower efficacy (smaller viral drop) in cycle 1 and cycle 3. In contrast, fast regulatory response was also associated with higher efficacy in cycle 2, which follows a shorter 2-week break in treatment. Recall that high  $\delta_{\text{REG}}$  also causes regulation to abate quickly after treatment. Taken together, these correlations indicate that: 1) successive doses are more effective if they are timed such that the regulatory signal is allowed to abate between doses; and 2) directly blocking regulation (e.g. lowering  $\lambda$  or  $\varphi$ ) could improve treatment response to N-803.

Correlations between tolerance parameters and treatment efficacy mirrored those of regulation, with some key differences. Tolerance strength ( $\eta$ ) had correlations that fell between those of killing regulation strength ( $\lambda$ ) and proliferation regulation strength ( $\varphi$ ). This reflects how tolerance strength ( $\eta$ ) reduces N-803 stimulation of both cytotoxicity and proliferation of CD8<sup>+</sup> T cells and NK cells. Rapid onset of tolerance (i.e. high  $\delta_{\text{TOL}}$ ) was also correlated with lower treatment efficacy in cycle 1. Unlike regulation speed ( $\delta_{\text{REG}}$ ), the direction of the correlation for tolerance speed did not change for cycle 2. Based on the NHP data, the drug tolerance model mechanism was structurally slower than regulation based on the number of delay variables ( $N = 6$  for tolerance and  $M = 2$  for regulation). With tolerance being slower to adapt, the 2-week break between cycles 1 and 2 was too short to allow the effects of tolerance to subside. However, the tolerance recovery

parameter ( $\tau$ ) had a comparably positive correlation to the treatment effectiveness in cycle 3 as regulation speed had to cycle 2. Together, this reflects how tolerance and regulation effects of previous treatment cycles may alter the outcome of the subsequent treatment cycles.

High initial frequency of the escape variant (i.e. high  $f$ ) is correlated with lower treatment efficacy in cycle 1 but not cycle 2. This difference between cycles 1 and 2 is because the escape variant ( $W$ ) largely replaced the dominant variant ( $V$ ) due to the selective pressure of treatment in cycle 1. The correlation reappears in cycle 3, as the original dominant variant recovers in the break between cycles 2 and 3 due to a fitness advantage over the escape variant. High susceptibility of the escape variant to CD8<sup>+</sup> T cells (i.e. high  $\chi$ ) was associated with higher treatment efficacy in all three treatment cycles. This consistent correlation across cycles is indicative of how viral escape, as modeled here, leads to persistent loss of efficacy.

**Table S2. Sensitivity analysis.**

| Measure of treatment efficacy | Killing Regulation Strength | Proliferation Regulation Strength | Regulation Speed      | Tolerance Strength | Tolerance Speed       | Tolerance Recovery | Variant W Initial Frequency | Variant W Susceptibility to T cells | Dummy Variable |
|-------------------------------|-----------------------------|-----------------------------------|-----------------------|--------------------|-----------------------|--------------------|-----------------------------|-------------------------------------|----------------|
|                               | $\lambda$                   | $\phi$                            | $\delta_{\text{REG}}$ | $H$                | $\delta_{\text{TOL}}$ | $\tau$             | $f$                         | $\chi$                              |                |
| Cycle 1 virus drop            | -0.60                       | -0.13                             | -0.50                 | -0.21              | -0.23                 | -                  | -0.30                       | +0.25                               | -              |
| Cycle 2 virus drop            | -0.49                       | -0.36                             | +0.07                 | -0.47              | -0.07                 | -                  | -                           | +0.13                               | -              |
| Cycle 3 virus drop            | -0.35                       | -0.08                             | -0.39                 | -0.17              | -0.07                 | +0.07              | -0.06                       | +0.23                               | -              |

Shown are the partial rank correlation coefficients (PRCC) of select model parameters to N-803 treatment efficacy, as measured by the drop in viral load during each cycle (Fig S6). The strongest possible negative correlation is  $-1$ , and the strongest possible positive correlation is  $+1$ . Correlations shown had p-value  $\leq 0.00001$  across three repetitions of 10,000 samples

## **Comparison to IL-15 receptors and inhibitory markers**

Additional data collected along with our training data validated the timing of immune regulation and drug tolerance. Specifically, the immune regulation  $REG_M$  (Eq. 7-8,14) increased shortly after treatment began and decayed shortly after treatment ended (Figs S7A,B). This agrees well with markers indicative of immune regulation, such as inhibitory marker expression on CD4<sup>+</sup> T cells, CD8<sup>+</sup> T cells, and NK cells (Figs S7C-E). The speed of regulation depended on the model. When drug tolerance was present (model #3) immune regulation was potentially very fast. In contrast, drug tolerance had a slower onset (Fig S7F), shown as  $TOL_{N-1} + TOL_N$  (Eq. 7-8, 11-12). Tolerance was not substantial until the second week, which slightly precedes the observed decline in N-803 receptors observed in the data (Fig G-I). In summary, the timing of modeled immune regulation and drug tolerance was consistent with markers of the mechanisms they represent.

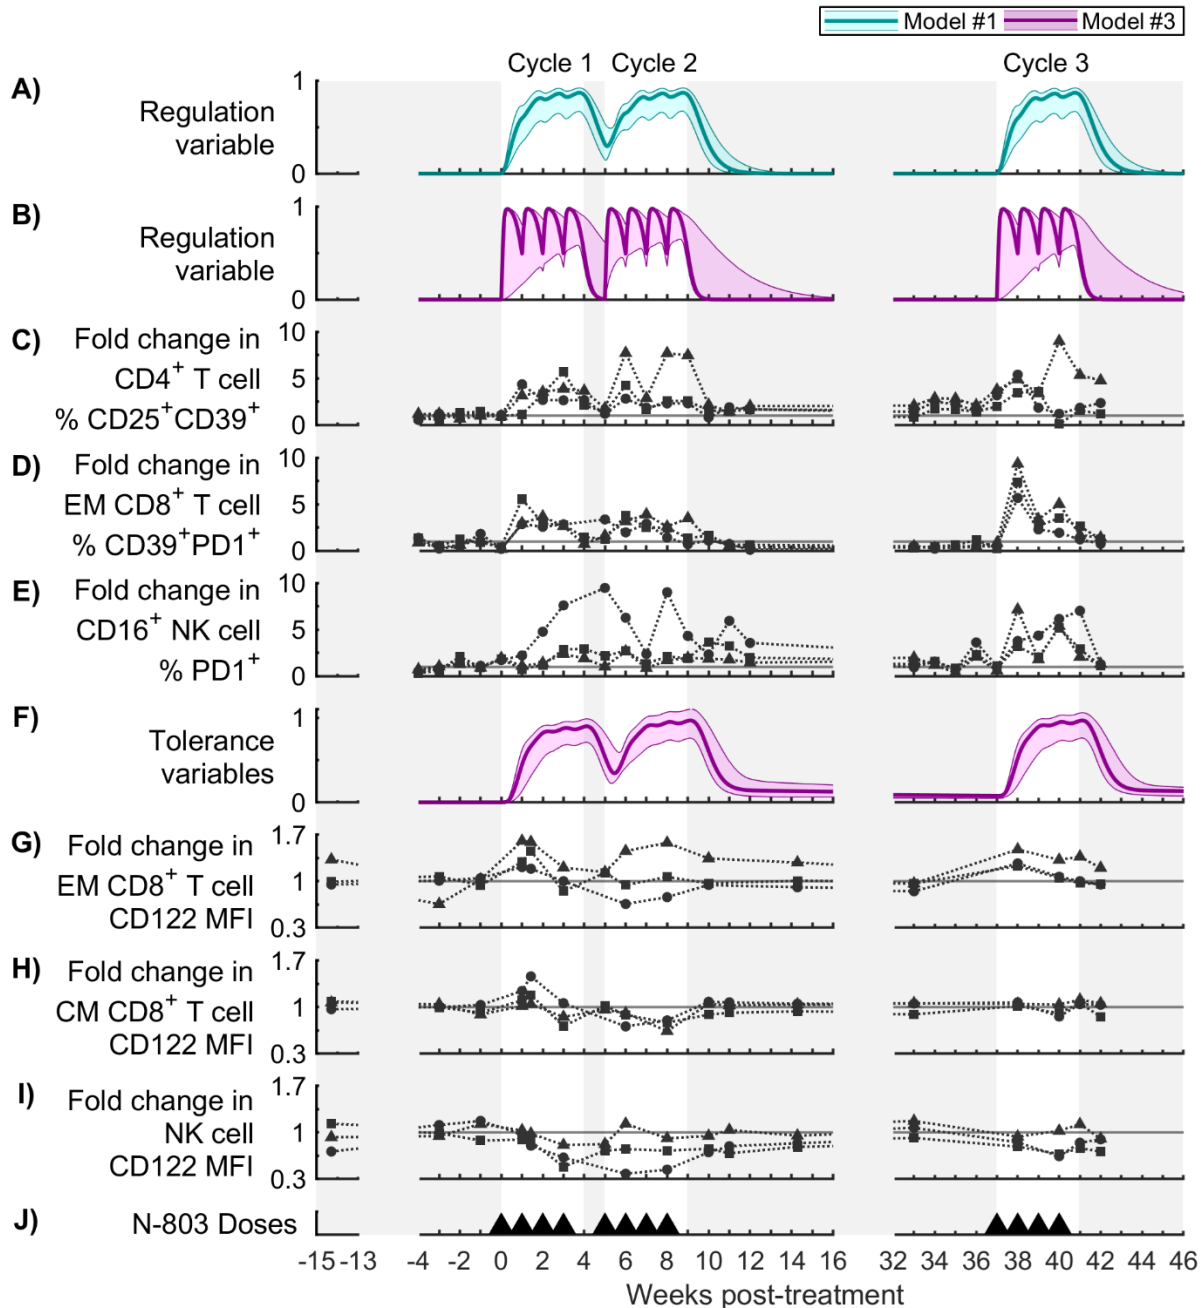

**Fig S7. Comparison of regulation dynamics in model and data.** Panels (A,B) show immune regulation  $REG_M$  (Eq. 7-8,14) in model #1 and model #3, respectively. Panel (F) shows drug tolerance  $TOL_{N-1} + TOL_N$  (Eq. 7-8, 11-12) in model #3. The bold line corresponds to the best-fit model, and the shaded region corresponds to the Bayesian 95% credible interval. Panels (C-E) and (G-H) show changes in expression of inhibitory markers and IL-15 receptor subunits during N-803 treatment (selected from [1]). Panel (C) shows changes in the frequency of  $CD25^+CD39^+$  cells among  $CD4^+$  T cells (i.e. regulatory T cells). Panel (D) shows changes in the frequency of  $CD39^+PD1^+$  cells among effector memory  $CD8^+$  T cells. Panel (E) shows changes in the frequency of  $PD1^+$  cells among  $CD16^+$  NK cells. Panels (G-I) show changes in the expression of the IL-15 receptor subunit (CD122) on effector memory  $CD8^+$  T cells, central memory  $CD8^+$  T cells, and NK cells. For each NHP, data is normalized to the mean of pre-treatment data points.

## Model with long-term immune regulation

It is conceivable that N-803 induced deviations in immune regulatory signals could persist across the long treatment gap, which could provide a simpler explanation of long-term CD8<sup>+</sup> T cell, NK cell, and SIV dynamics. To this end, a model with long-term regulation, and no drug tolerance, was also calibrated to the NHP data. This model deviates from the full model (Eq. 1-18) by replacing Eq. (7,8) with Eq. (S10,S11).

$$g_i \rightarrow g_i \left[ 1 + \overbrace{\gamma_i \left( \frac{[C]}{C_{50} + [C]} \right)}^{\text{Drug Effect}} \right] \left( \overbrace{\frac{1}{1 + \lambda ([TOL_{N-1}] + [TOL_N])}}^{\text{Immune Regulation}} \right) \quad i = E, K \quad (\text{S10})$$

$$r_i \rightarrow r_i \left[ 1 + \rho_i \left( \frac{[C]}{C_{50} + [C]} \right) \right] \left( \frac{1}{1 + \phi ([TOL_{N-1}] + [TOL_N])} \right) \quad i = E, K \quad (\text{S11})$$

While the model was able to reproduce the dynamics of CD8<sup>+</sup> T cells and NK cells (Fig S8B,C), the dynamics of SIV was poorly represented (Fig S8A). The viremia decayed to a setpoint during treatment cycle 1 without the subsequent rebound observed in the NHP data. Thus, allowing immune regulation to persist long-term, absent drug tolerance, does not qualitatively match the viral dynamics.

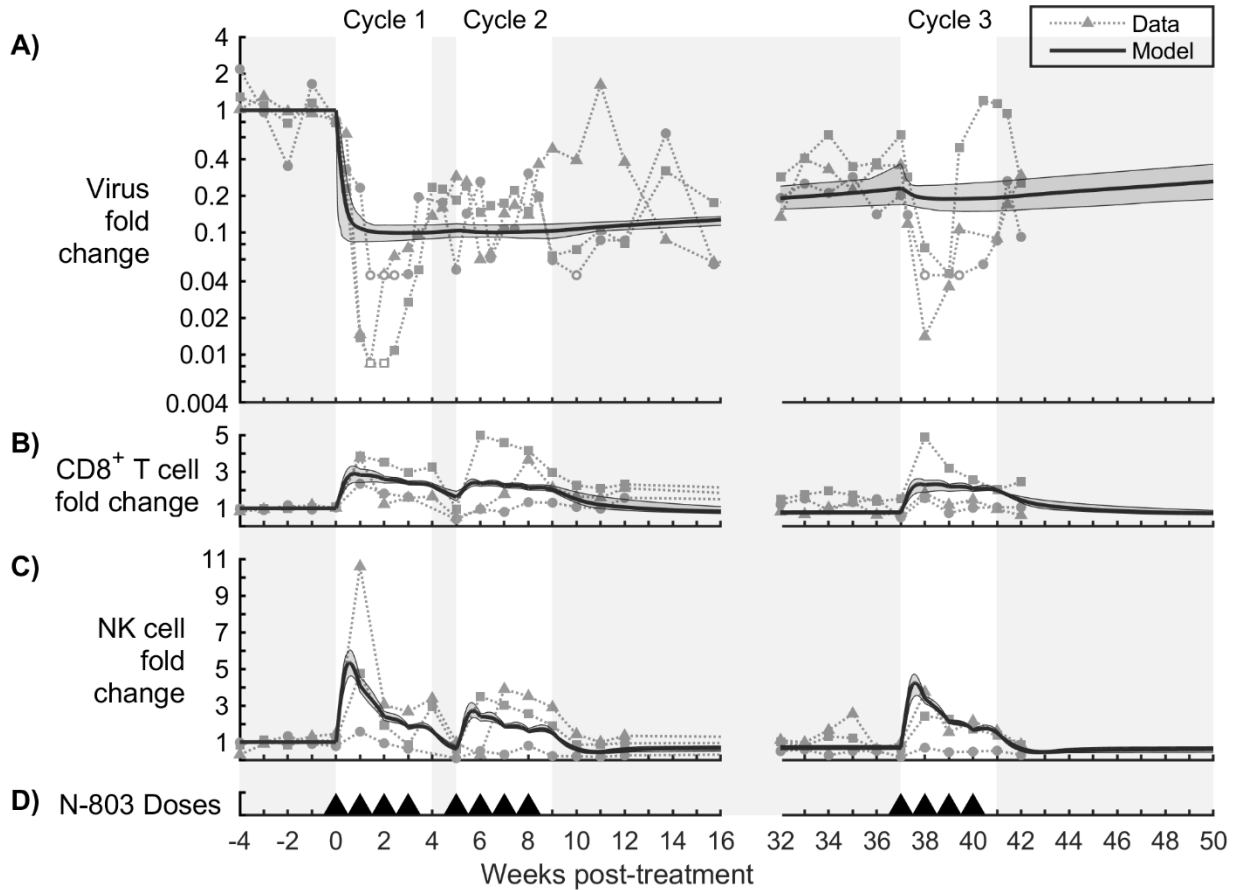

**Fig S8. Long-term regulation model calibration.** A model with long-term regulation, and no drug tolerance (see Eq. S10,S11), was calibrated to (A) fold change in virus in the plasma, (B) fold change in CD8<sup>+</sup> T cells in the peripheral blood, and (C) fold change in NK cells in the peripheral blood. Panel (D) shows timing of 0.1 mg/kg subcutaneous doses of N-803. Model outputs are shown as the mean (solid line) and range (shaded region) of model outputs from the top 20 parameter sets (lowest NLL) from the calibration procedure. Data from N-803-treated SIV-infected NHPs are shown as different symbols for each NHP. Open symbols represent viral load below the detection limit of the assay (100 viral RNA copies/mL).



## Individual fitting

Parameter estimation, uncertainty quantification, and model comparison were repeated utilizing data from each of the three subjects individually. Figures S9-S11 show the full model results (comparable to Fig 3 in the main text). Figures S12-S14 shows the model comparisons with respect to viral load (comparable to Fig 4). Figures S15-S17 show the model comparisons with respect to cytotoxic cells (comparable to Fig 5). Figures S18-S20 show the parameter distributions (comparable to Fig S1).

The inspection of individual fits lend support to the decision to fit all three subjects simultaneously. Some extreme model behaviors resulted from fitting to what could potentially be measurement noise. For example, The NK cells for subject r08016 showed a nearly 17-fold increase (Fig S9), driven chiefly by a single data point. Still, the results of model comparison held for subject r08016 and r09089 (Fig S12,S13). In short, model #1 (immune regulation and viral escape) and model #3 (immune regulation and drug tolerance) were the best models. These models had both low AICc and met all three quality criteria. Subject r11021, however, had viral load that was closer to the limit of detection of the assay. Thus, much of the cycle 1 decline and rebound observed in the other two subjects was censored in subject r11021. This resulted in all models having comparable fits to this subject's data (Fig S14), owing to the simpler dynamics presented.

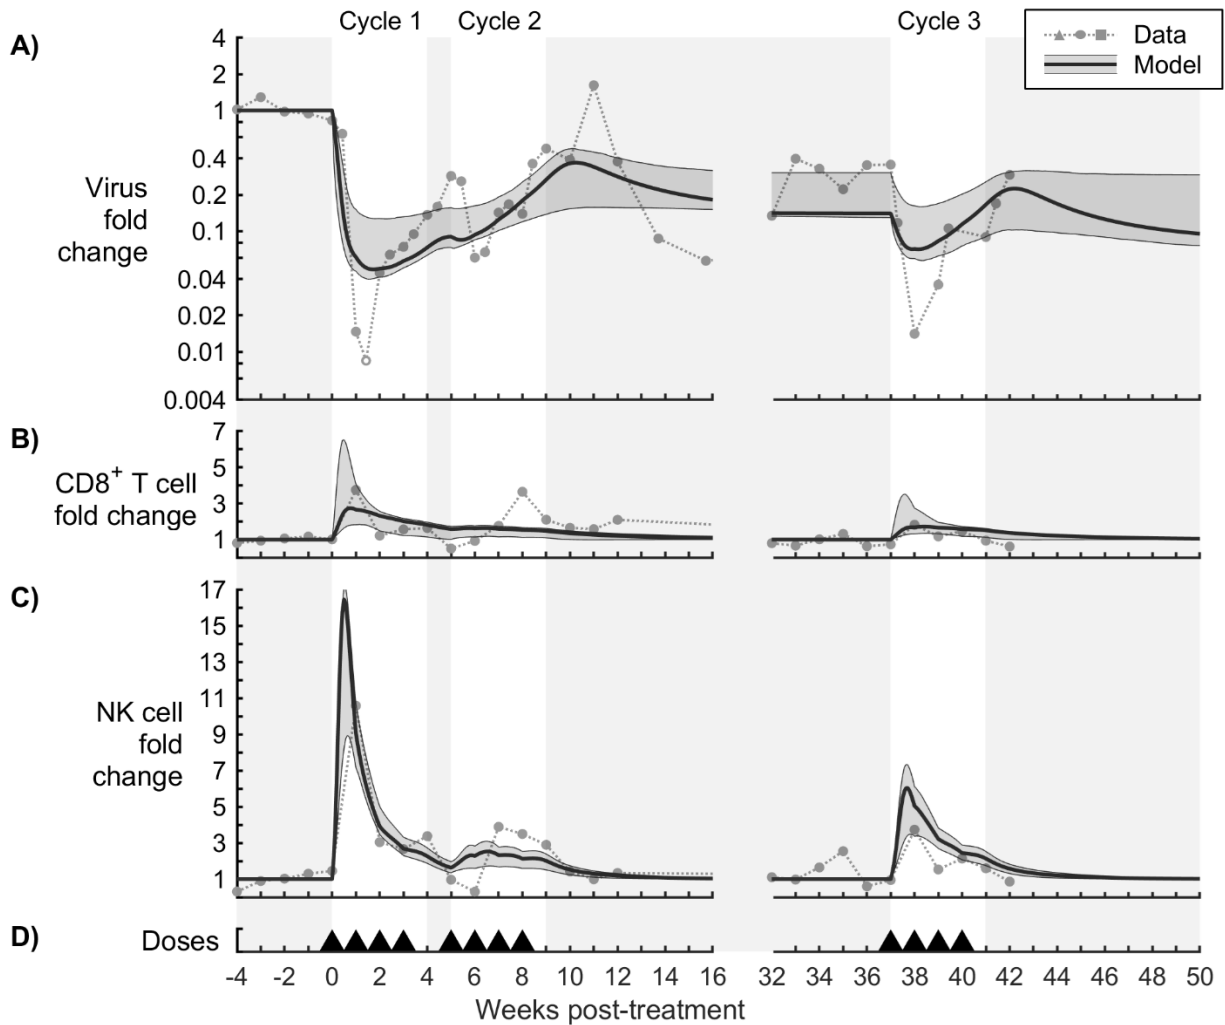

**Fig S9. Model calibration to N-803-treated SIV-infected NHP data (Subject r08016).** The model was calibrated to (A) fold change in virus in the plasma, (B) fold change in CD8<sup>+</sup> T cells in the peripheral blood, and (C) fold change in NK cells in the peripheral blood. The bold line corresponds to the best-fit model, and the shaded region corresponds to the Bayesian 95% credible interval. See Figure S18 for corresponding parameter distributions. Data from N-803-treated SIV-infected NHPs are shown as different symbols for each NHP [1]. Open symbols were at the lower limit of detection for the viral assay (100 CEQ/mL) and were omitted from parameter estimation. Panel (D) shows timing of 0.1 mg/kg subcutaneous doses of N-803.

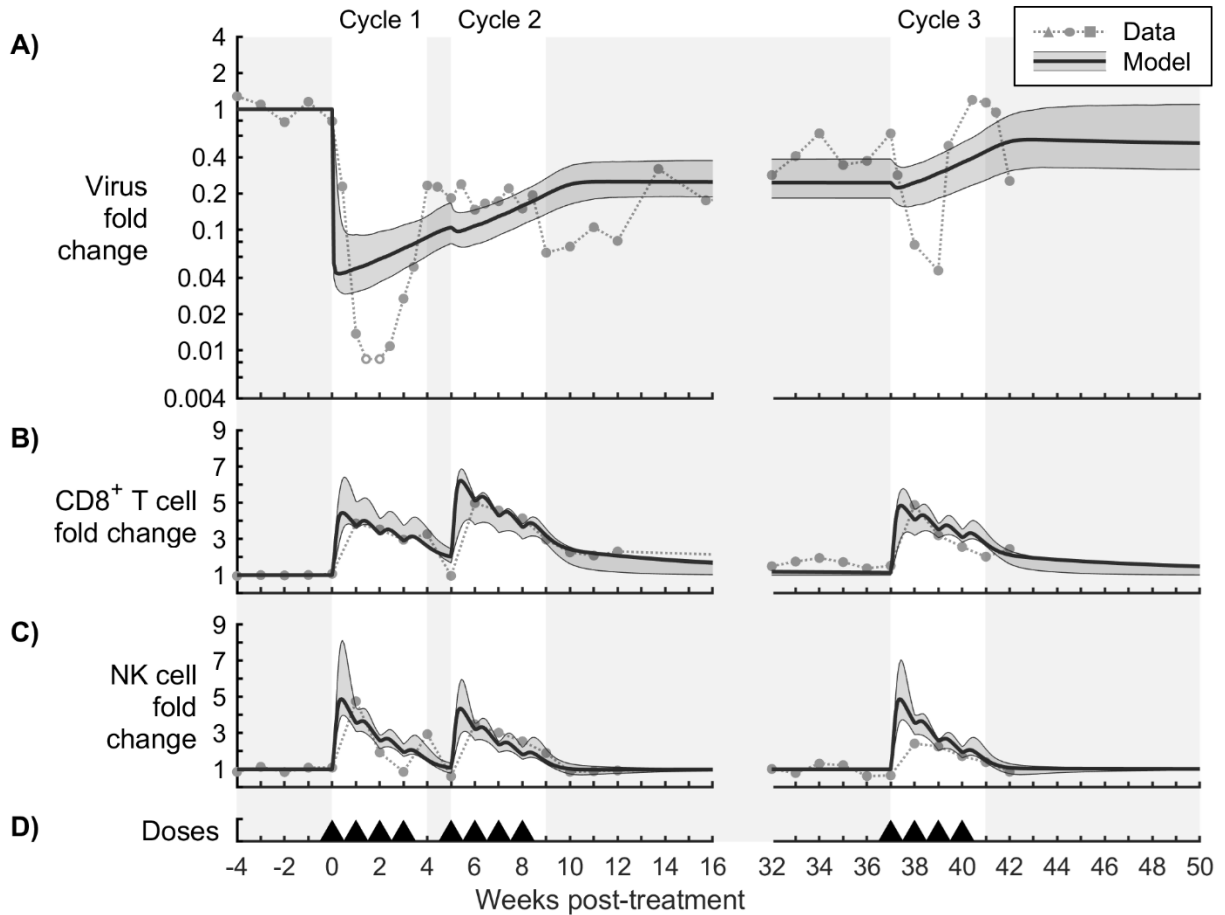

**Fig S10. Model calibration to N-803-treated SIV-infected NHP data (Subject r09089).** The model was calibrated to (A) fold change in virus in the plasma, (B) fold change in CD8<sup>+</sup> T cells in the peripheral blood, and (C) fold change in NK cells in the peripheral blood. The bold line corresponds to the best-fit model, and the shaded region corresponds to the Bayesian 95% credible interval. See Figure S19 for corresponding parameter distributions. Data from N-803-treated SIV-infected NHPs are shown as different symbols for each NHP [1]. Open symbols were at the lower limit of detection for the viral assay (100 CEQ/mL) and were omitted from parameter estimation. Panel (D) shows timing of 0.1 mg/kg subcutaneous doses of N-803.

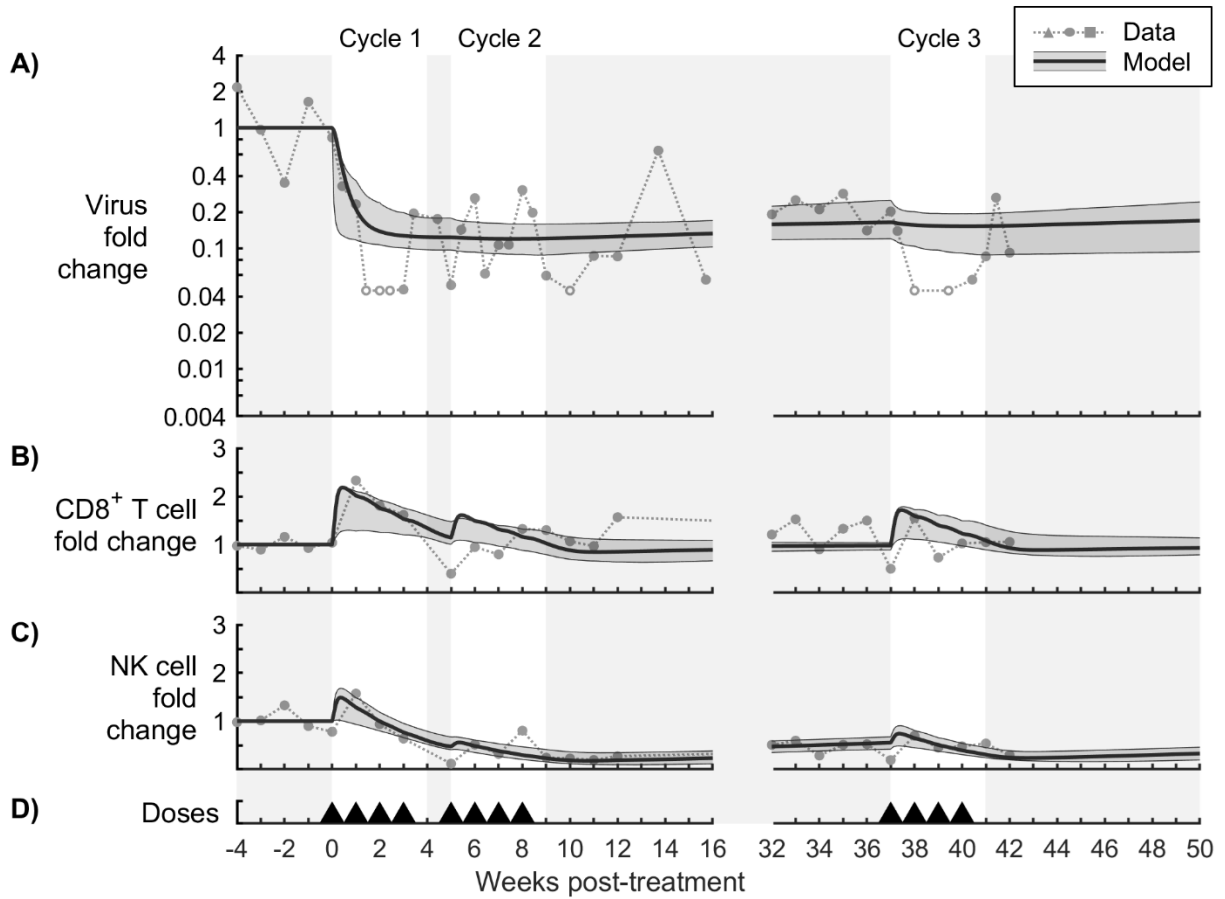

**Fig S11. Model calibration to N-803-treated SIV-infected NHP data (Subject r11021).** The model was calibrated to (A) fold change in virus in the plasma, (B) fold change in CD8<sup>+</sup> T cells in the peripheral blood, and (C) fold change in NK cells in the peripheral blood. The bold line corresponds to the best-fit model, and the shaded region corresponds to the Bayesian 95% credible interval. See Figure S20 for corresponding parameter distributions. Data from N-803-treated SIV-infected NHPs are shown as different symbols for each NHP [1]. Open symbols were at the lower limit of detection for the viral assay (100 CEQ/mL) and were omitted from parameter estimation. Panel (D) shows timing of 0.1 mg/kg subcutaneous doses of N-803.

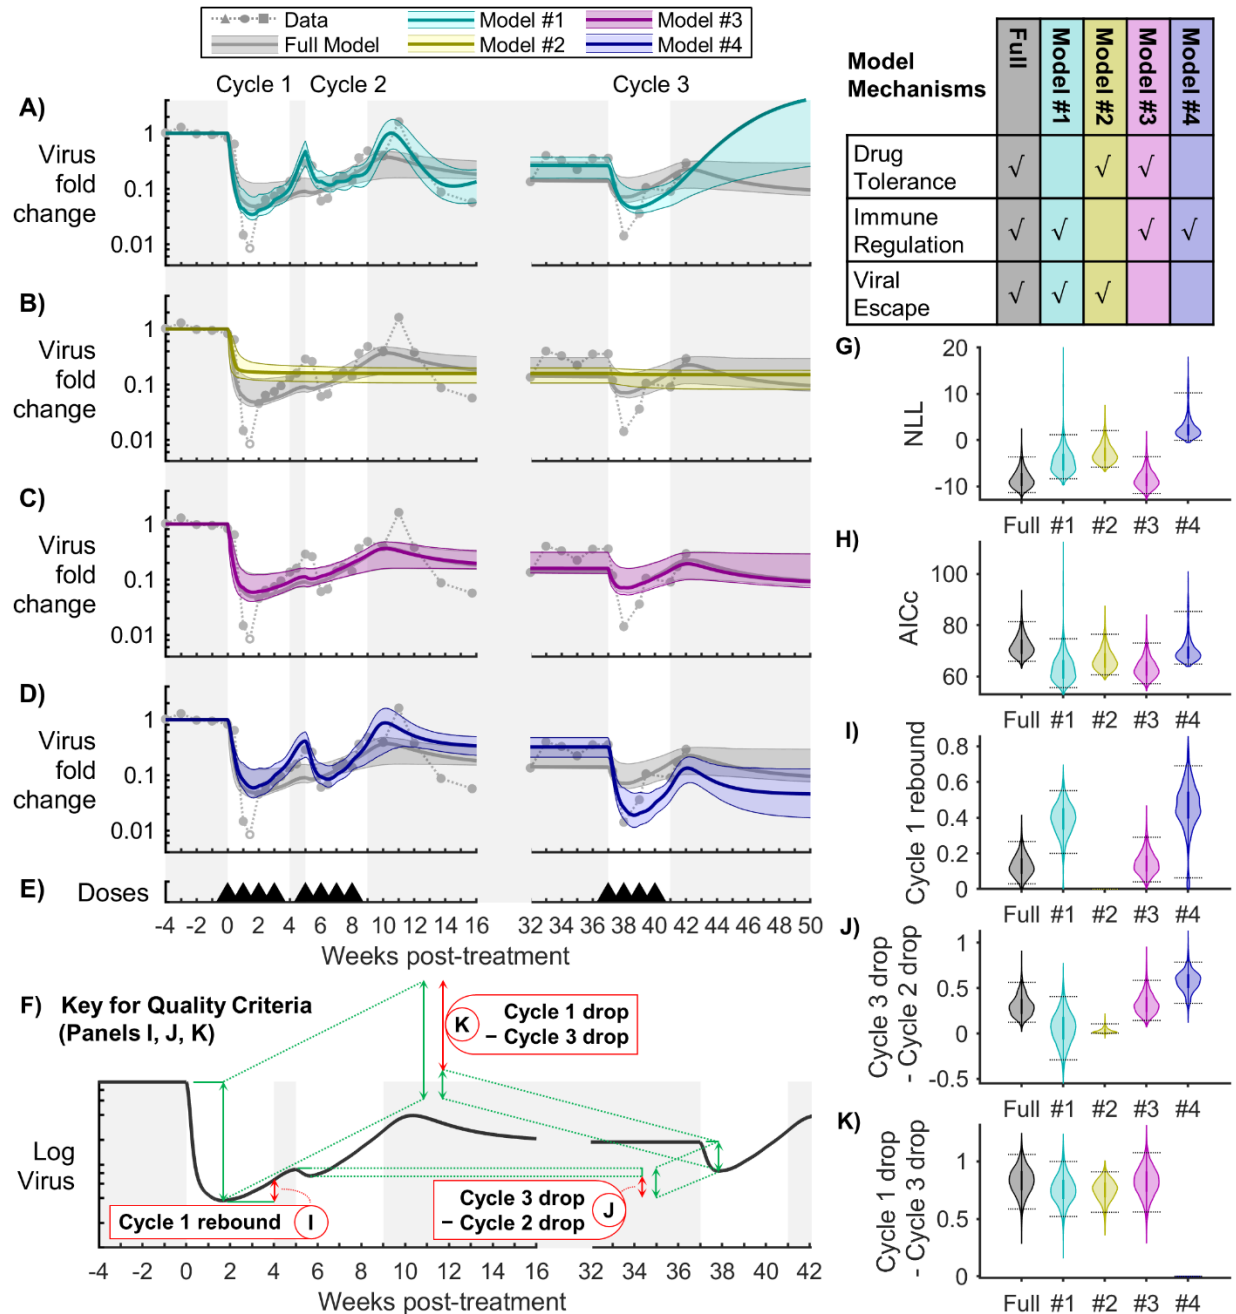

**Fig S12. Model comparison for viral load (Subject r08016).** Models with different combinations of mechanisms were compared to assess the importance of drug tolerance, immune regulation, and viral escape. Panels (A-D) compare the fold change in virus between the full model and models #1-4, respectively. The bold line corresponds to the best-fit model, and the shaded region corresponds to the Bayesian 95% credible interval. Panel (E) shows timing of 0.1 mg/kg subcutaneous doses of N-803. Panels (G,H) show the corresponding Negative Log-Likelihood (NLL, Eq. 20) and Akaike Information Criterion (AICc, Eq. 21) for the Bayesian MCMC samples. Panels (I-K) show the three quality criteria, which are described in panel (F). Bayesian 95% credible intervals are marked.

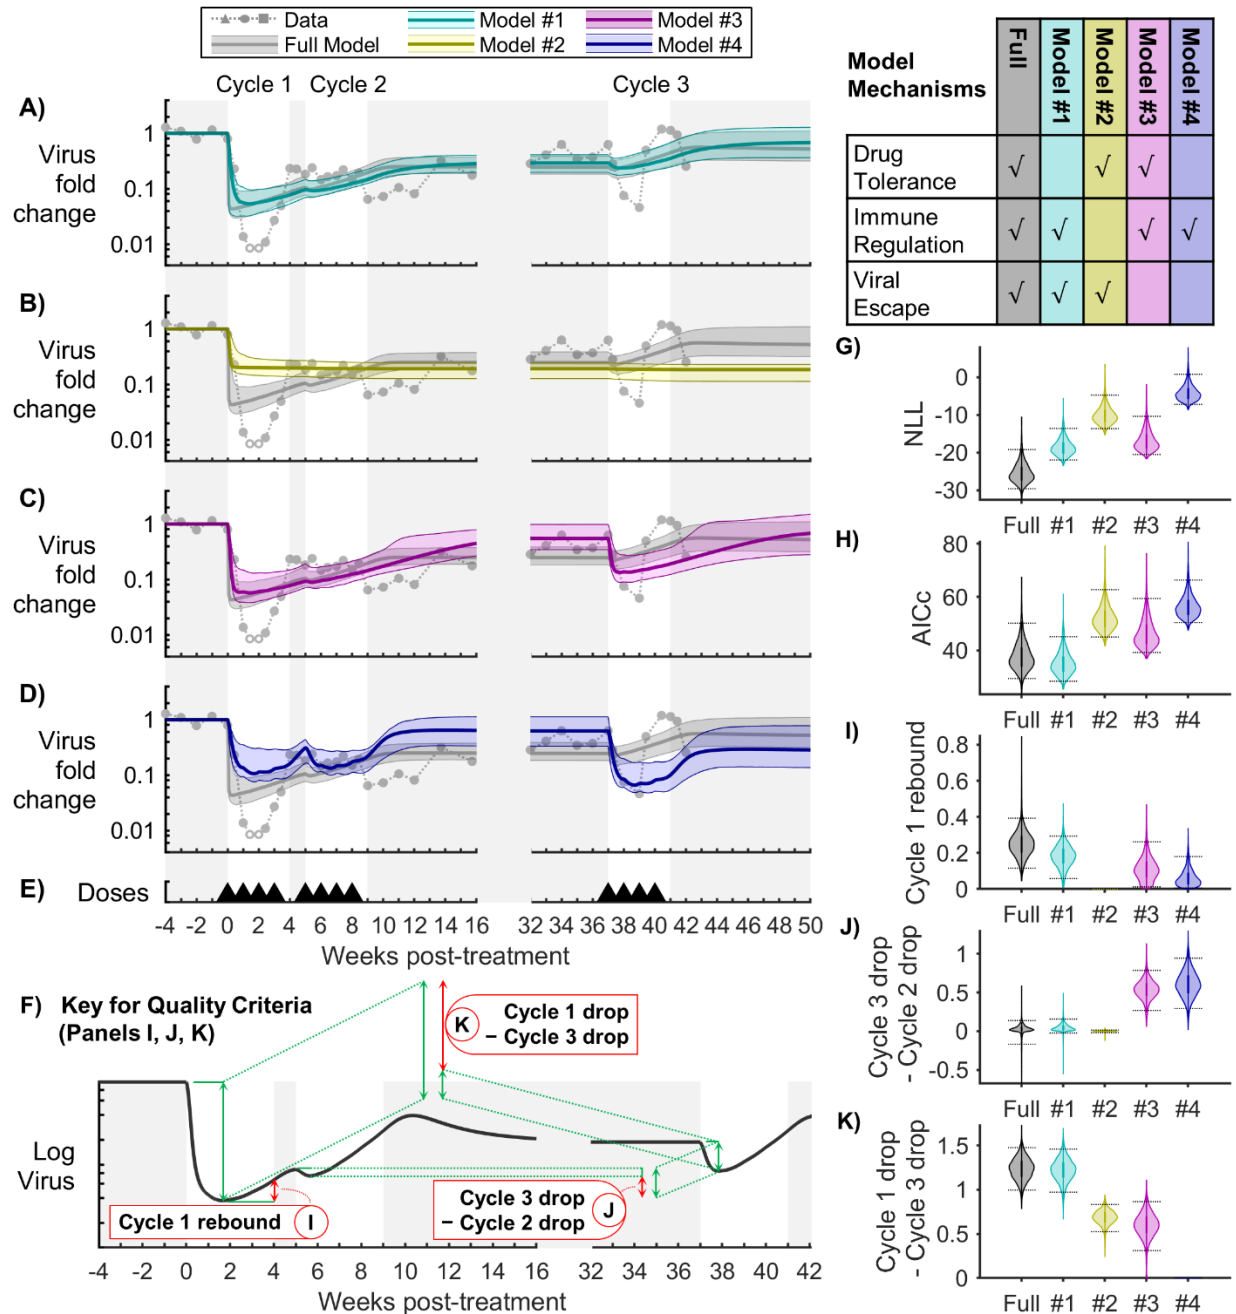

**Fig S13. Model comparison for viral load (Subject r09089).** Models with different combinations of mechanisms were compared to assess the importance of drug tolerance, immune regulation, and viral escape. Panels (A-D) compare the fold change in virus between the full model and models #1-4, respectively. The bold line corresponds to the best-fit model, and the shaded region corresponds to the Bayesian 95% credible interval. Panel (E) shows timing of 0.1 mg/kg subcutaneous doses of N-803. Panels (G,H) show the corresponding Negative Log-Likelihood (NLL, Eq. 20) and Akaike Information Criterion (AICc, Eq. 21) for the Bayesian MCMC samples. Panels (I-K) show the three quality criteria, which are described in panel (F). Bayesian 95% credible intervals are marked.

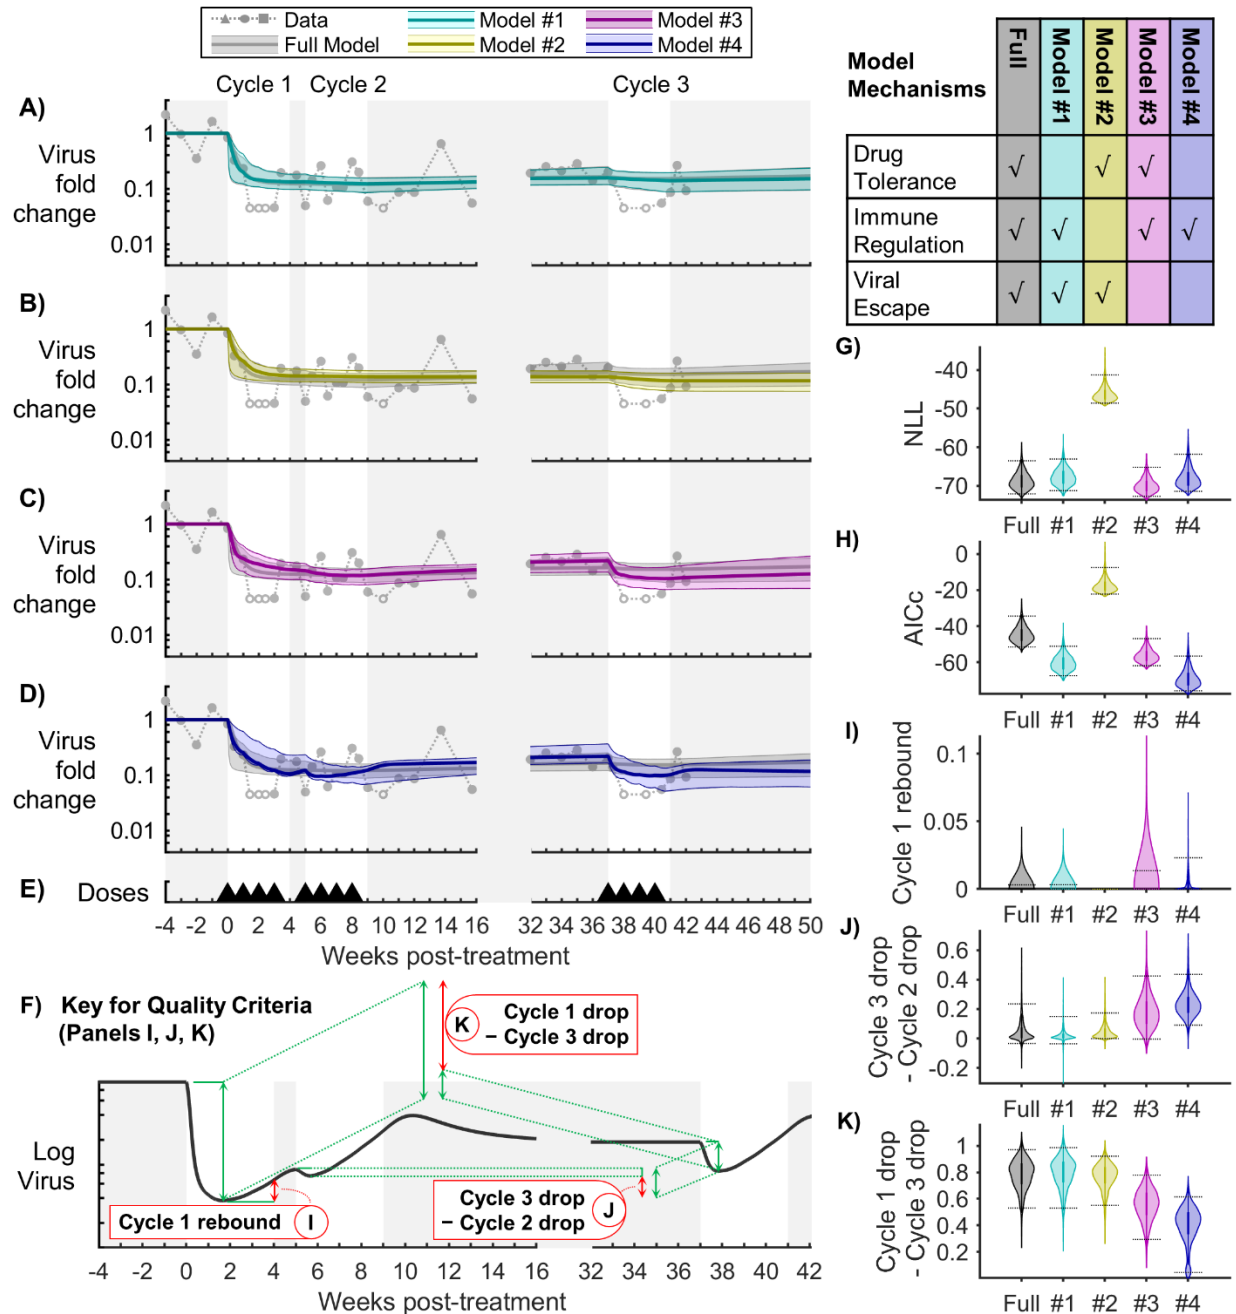

**Fig S14. Model comparison for viral load (Subject r11021).** Models with different combinations of mechanisms were compared to assess the importance of drug tolerance, immune regulation, and viral escape. Panels (A-D) compare the fold change in virus between the full model and models #1-4, respectively. The bold line corresponds to the best-fit model, and the shaded region corresponds to the Bayesian 95% credible interval. Panel (E) shows timing of 0.1 mg/kg subcutaneous doses of N-803. Panels (G,H) show the corresponding Negative Log-Likelihood (NLL, Eq. 20) and Akaike Information Criterion (AICc, Eq. 21) for the Bayesian MCMC samples. Panels (I-K) show the three quality criteria, which are described in panel (F). Bayesian 95% credible intervals are marked.



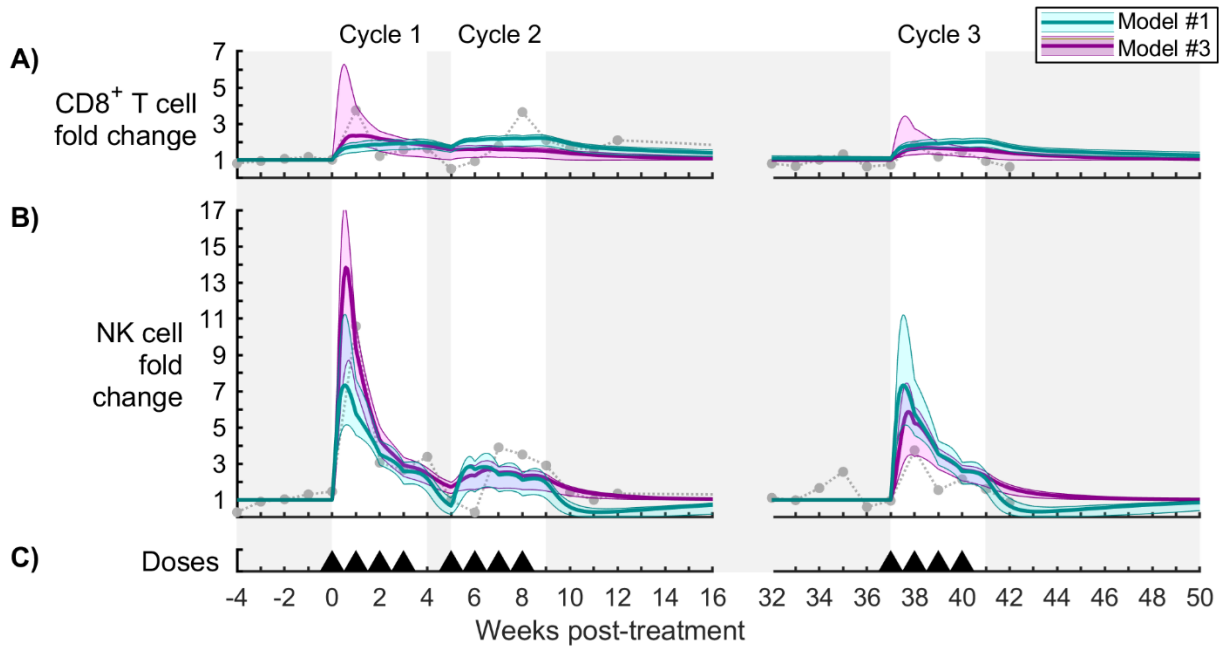

**Fig S15. Model comparison for cytotoxic cells (Subject r08016).** Panels (A,B) show fold change in CD8<sup>+</sup> T cells and NK cells in the peripheral blood, respectively, for the model without drug tolerance (cyan model #1) and the model without viral escape (magenta model #3). The bold line corresponds to the best-fit model, and the shaded region corresponds to the Bayesian 95% credible interval. See Figure S18 for corresponding parameter distributions. Data from N-803-treated SIV-infected NHPs are shown as different symbols for each NHP [1]. Panel (C) shows timing of 0.1 mg/kg subcutaneous doses of N-803.

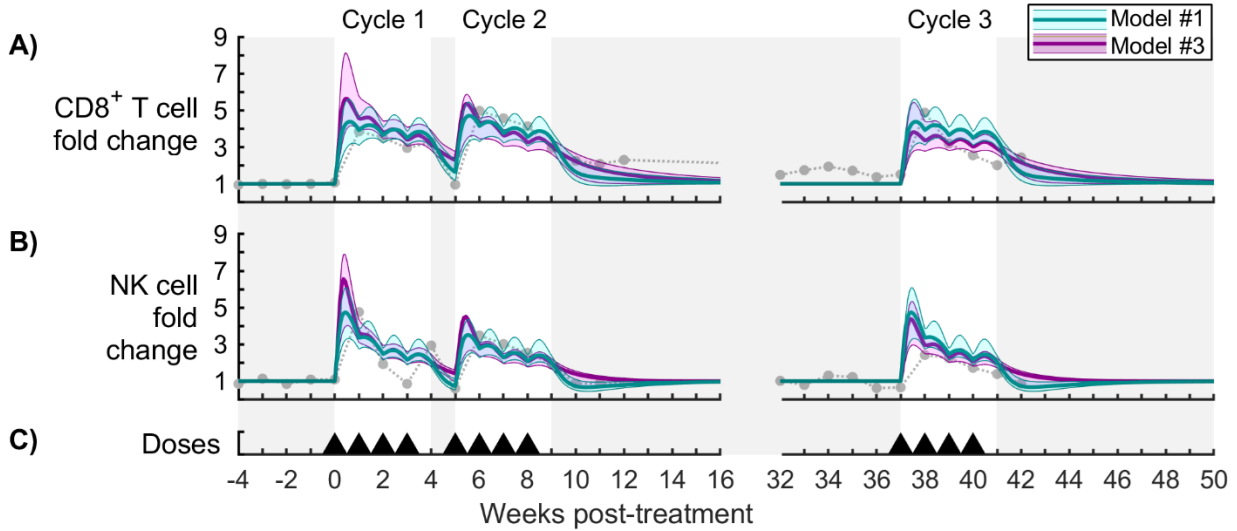

**Fig S16. Model comparison for cytotoxic cells (Subject r09089).** Panels (A,B) show fold change in CD8<sup>+</sup> T cells and NK cells in the peripheral blood, respectively, for the model without drug tolerance (cyan model #1) and the model without viral escape (magenta model #3). The bold line corresponds to the best-fit model, and the shaded region corresponds to the Bayesian 95% credible interval. See Figure S19 for corresponding parameter distributions. Data from N-803-treated SIV-infected NHPs are shown as different symbols for each NHP [1]. Panel (C) shows timing of 0.1 mg/kg subcutaneous doses of N-803.

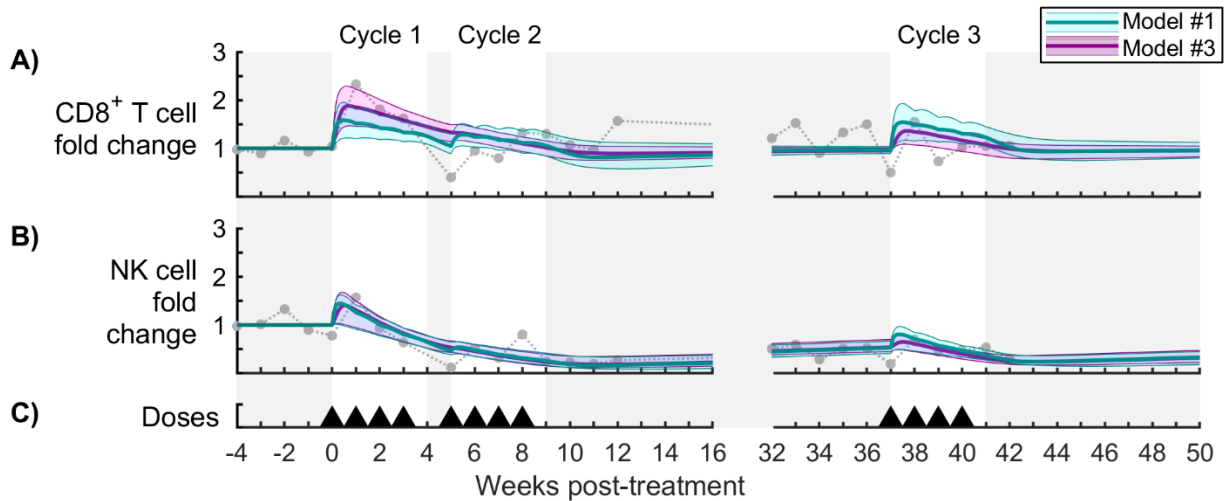

**Fig S17. Model comparison for cytotoxic cells (Subject r11021).** Panels (A,B) show fold change in CD8<sup>+</sup> T cells and NK cells in the peripheral blood, respectively, for the model without drug tolerance (cyan model #1) and the model without viral escape (magenta model #3). The bold line corresponds to the best-fit model, and the shaded region corresponds to the Bayesian 95% credible interval. See Figure S20 for corresponding parameter distributions. Data from N-803-treated SIV-infected NHPs are shown as different symbols for each NHP [1]. Panel (C) shows timing of 0.1 mg/kg subcutaneous doses of N-803.

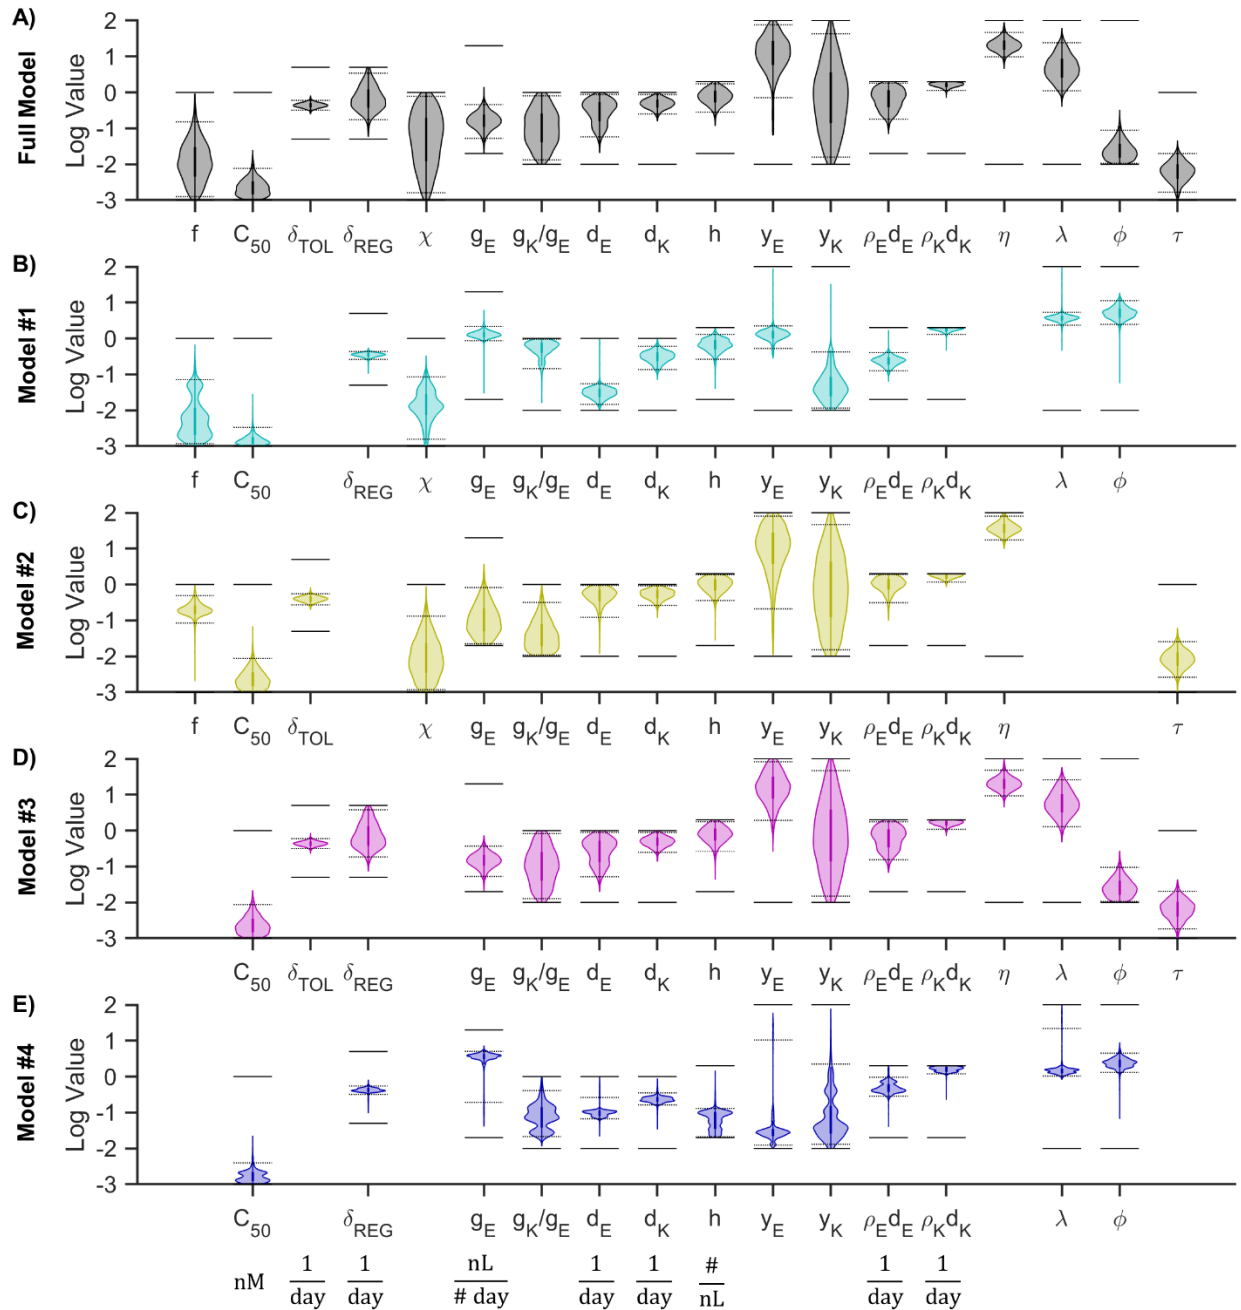

**Fig S18. Sampled parameter distributions (Subject r08016).** Panels (A-E) show the Bayesian MCMC sample of the posterior distributions of parameter values for the full model and for models #1-4 on a logarithmic scale. Bayesian 95% credible intervals are shown as dotted lines. Allowed parameter ranges (from Table 3) are shown as solid lines. Note that some units of measurement (shown below panel E) are different from those in Table 3.

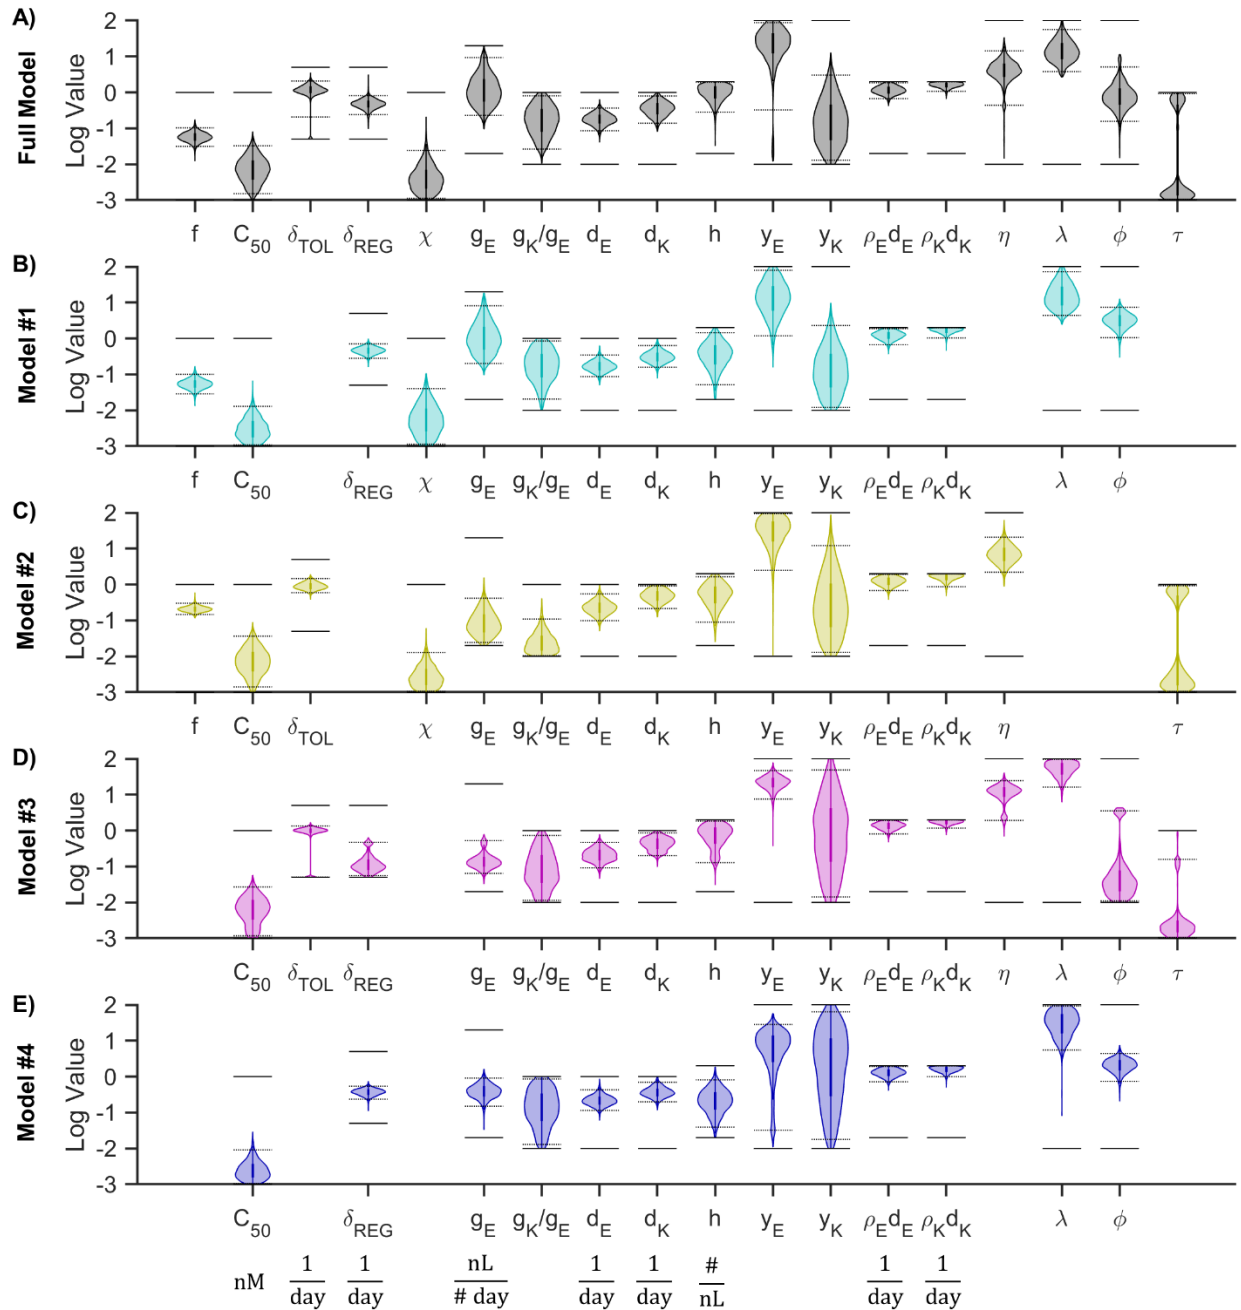

**Fig S19. Sampled parameter distributions (Subject r09089).** Panels (A-E) show the Bayesian MCMC sample of the posterior distributions of parameter values for the full model and for models #1-4 on a logarithmic scale. Bayesian 95% credible intervals are shown as dotted lines. Allowed parameter ranges (from Table 3) are shown as solid lines. Note that some units of measurement (shown below panel E) are different from those in Table 3.

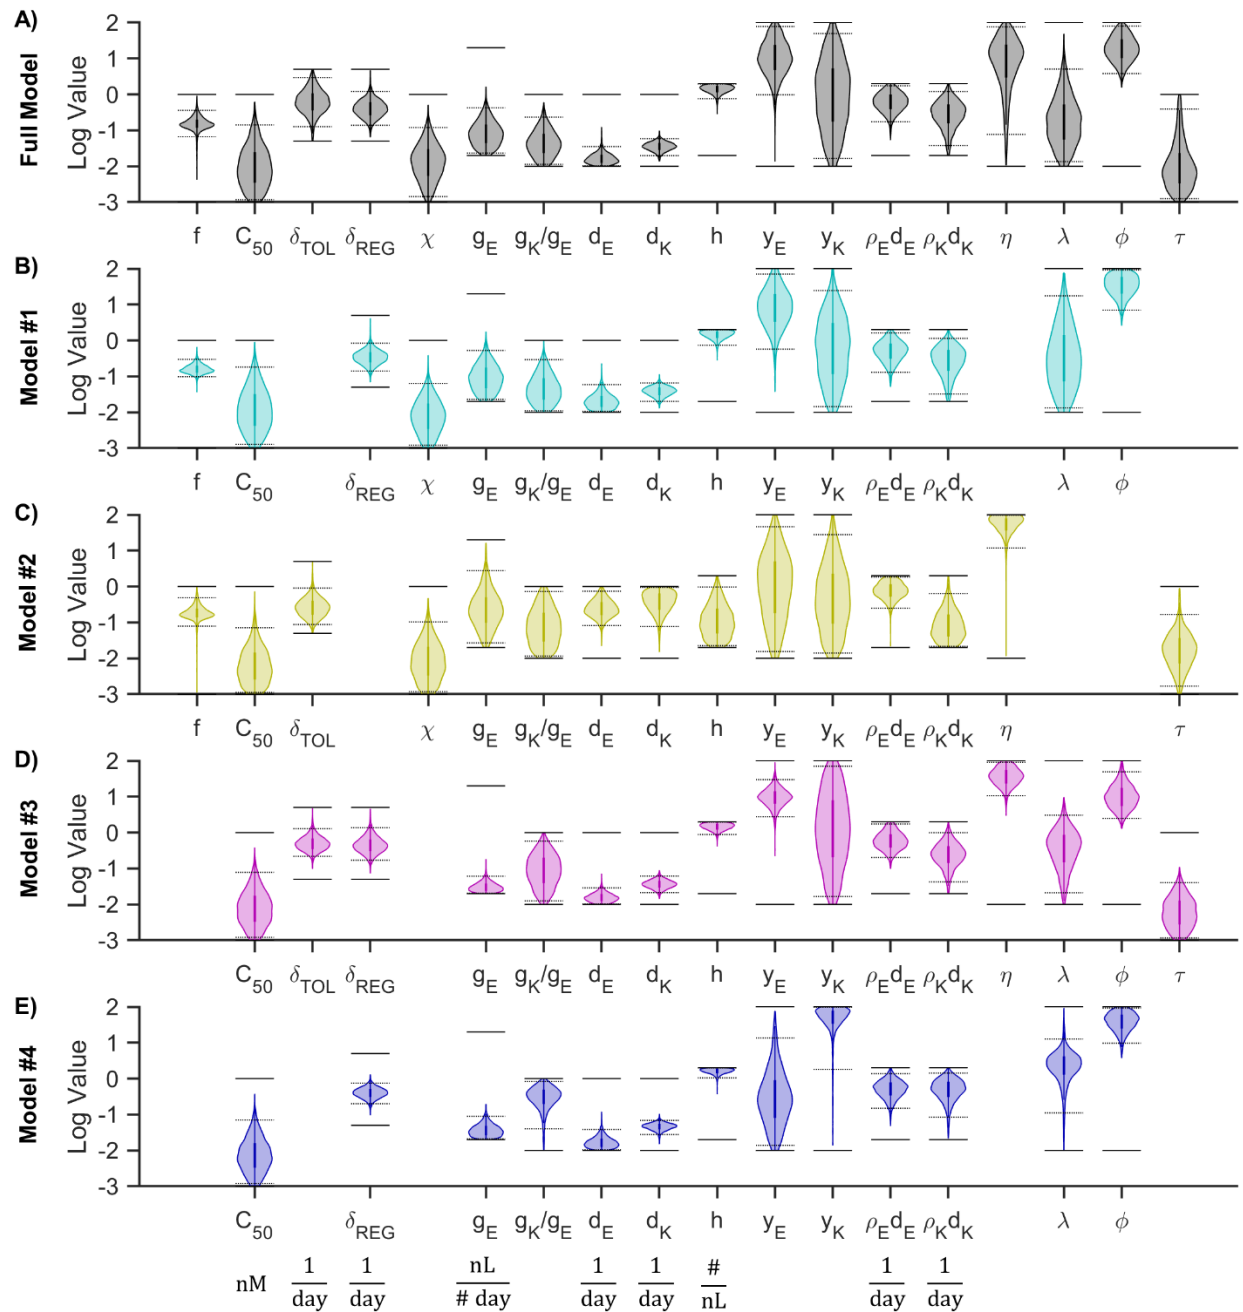

**Fig S20. Sampled parameter distributions (Subject r11021).** Panels (A-E) show the Bayesian MCMC sample of the posterior distributions of parameter values for the full model and for models #1-4 on a logarithmic scale. Bayesian 95% credible intervals are shown as dotted lines. Allowed parameter ranges (from Table 3) are shown as solid lines. Note that some units of measurement (shown below panel E) are different from those in Table 3.

## References

1. Ellis-Connell AL, Balgeman AJ, Zarbock KR, Barry G, Weiler A, Egan JO, et al. ALT-803 Transiently Reduces Simian Immunodeficiency Virus Replication in the Absence of Antiretroviral Treatment. *Journal of virology*. 2018;92(3). Epub 2017/11/10. doi: 10.1128/jvi.01748-17. PubMed PMID: 29118125; PubMed Central PMCID: PMC5774892.
2. Haase AT. Population biology of HIV-1 infection: viral and CD4+ T cell demographics and dynamics in lymphatic tissues. *Annual review of immunology*. 1999;17:625-56. Epub 1999/06/08. doi: 10.1146/annurev.immunol.17.1.625. PubMed PMID: 10358770.
3. Ramratnam B, Bonhoeffer S, Binley J, Hurley A, Zhang L, Mittler JE, et al. Rapid production and clearance of HIV-1 and hepatitis C virus assessed by large volume plasma apheresis. *Lancet (London, England)*. 1999;354(9192):1782-5. Epub 1999/11/30. doi: 10.1016/s0140-6736(99)02035-8. PubMed PMID: 10577640.
4. Zhang L, Dailey PJ, He T, Gettie A, Bonhoeffer S, Perelson AS, et al. Rapid clearance of simian immunodeficiency virus particles from plasma of rhesus macaques. *Journal of virology*. 1999;73(1):855-60. Epub 1998/12/16. PubMed PMID: 9847402; PubMed Central PMCID: PMC103903.
5. Zhang L, Dailey PJ, Gettie A, Blanchard J, Ho DD. The liver is a major organ for clearing simian immunodeficiency virus in rhesus monkeys. *Journal of virology*. 2002;76(10):5271-3. Epub 2002/04/23. PubMed PMID: 11967341; PubMed Central PMCID: PMC136155.
6. Cardozo EF, Andrade A, Mellors JW, Kuritzkes DR, Perelson AS, Ribeiro RM. Treatment with integrase inhibitor suggests a new interpretation of HIV RNA decay curves that reveals a subset of cells with slow integration. *PLoS pathogens*. 2017;13(7):e1006478. Epub 2017/07/06. doi: 10.1371/journal.ppat.1006478. PubMed PMID: 28678879; PubMed Central PMCID: PMC5513547.
7. Conway JM, Perelson AS. Residual Viremia in Treated HIV+ Individuals. *PLoS computational biology*. 2016;12(1):e1004677. Epub 2016/01/07. doi: 10.1371/journal.pcbi.1004677. PubMed PMID: 26735135; PubMed Central PMCID: PMC4703306.
8. Zimmermann C, Prévost-Blondel A, Blaser C, Pircher H. Kinetics of the response of naive and memory CD8 T cells to antigen: similarities and differences. *European journal of immunology*. 1999;29(1):284-90. Epub 1999/02/05. doi: 10.1002/(sici)1521-4141(199901)29:01<284::Aid-immu284>3.0.Co;2-c. PubMed PMID: 9933110.
9. Veiga-Fernandes H, Walter U, Bourgeois C, McLean A, Rocha B. Response of naïve and memory CD8+ T cells to antigen stimulation in vivo. *Nature immunology*. 2000;1(1):47-53. Epub 2001/03/23. doi: 10.1038/76907. PubMed PMID: 10881174.
10. Kim TS, Shin EC. The activation of bystander CD8(+) T cells and their roles in viral infection. *Experimental & molecular medicine*. 2019;51(12):1-9. Epub 2019/12/13. doi: 10.1038/s12276-019-0316-1. PubMed PMID: 31827070; PubMed Central PMCID: PMC6906361.
11. Younes SA, Freeman ML, Mudd JC, Shive CL, Reynaldi A, Panigrahi S, et al. IL-15 promotes activation and expansion of CD8+ T cells in HIV-1 infection. *The Journal of clinical investigation*. 2016;126(7):2745-56. Epub 2016/06/21. doi: 10.1172/jci85996. PubMed PMID: 27322062; PubMed Central PMCID: PMC4922693.
12. Bastidas S, Graw F, Smith MZ, Kuster H, Günthard HF, Oxenius A. CD8+ T cells are activated in an antigen-independent manner in HIV-infected individuals. *Journal of immunology (Baltimore, Md : 1950)*. 2014;192(4):1732-44. Epub 2014/01/22. doi: 10.4049/jimmunol.1302027. PubMed PMID: 24446519.
13. Kim J, Chang DY, Lee HW, Lee H, Kim JH, Sung PS, et al. Innate-like Cytotoxic Function of Bystander-Activated CD8(+) T Cells Is Associated with Liver Injury in Acute Hepatitis A.



- Immunity. 2018;48(1):161-73.e5. Epub 2018/01/07. doi: 10.1016/j.immuni.2017.11.025. PubMed PMID: 29305140.
14. Lin JX, Leonard WJ. The Common Cytokine Receptor  $\gamma$  Chain Family of Cytokines. Cold Spring Harbor perspectives in biology. 2018;10(9). Epub 2017/10/19. doi: 10.1101/cshperspect.a028449. PubMed PMID: 29038115; PubMed Central PMCID: PMC6120701.
  15. Au-Yeung BB, Smith GA, Mueller JL, Heyn CS, Jaszczak RG, Weiss A, et al. IL-2 Modulates the TCR Signaling Threshold for CD8 but Not CD4 T Cell Proliferation on a Single-Cell Level. *Journal of immunology (Baltimore, Md : 1950)*. 2017;198(6):2445-56. Epub 2017/02/06. doi: 10.4049/jimmunol.1601453. PubMed PMID: 28159902; PubMed Central PMCID: PMC5340617.
  16. Malek TR. The biology of interleukin-2. *Annual review of immunology*. 2008;26:453-79. Epub 2007/12/08. doi: 10.1146/annurev.immunol.26.021607.090357. PubMed PMID: 18062768.
  17. Papillion A, Powell MD, Chisolm DA, Bachus H, Fuller MJ, Weinmann AS, et al. Inhibition of IL-2 responsiveness by IL-6 is required for the generation of GC-TFH cells. *Science immunology*. 2019;4(39). Epub 2019/09/15. doi: 10.1126/sciimmunol.aaw7636. PubMed PMID: 31519812; PubMed Central PMCID: PMC6820141.
  18. Lugli E, Goldman CK, Perera LP, Smedley J, Pung R, Yovandich JL, et al. Transient and persistent effects of IL-15 on lymphocyte homeostasis in nonhuman primates. *Blood*. 2010;116(17):3238-48. Epub 2010/07/16. doi: 10.1182/blood-2010-03-275438. PubMed PMID: 20631381; PubMed Central PMCID: PMC2995354.
  19. Han KP, Zhu X, Liu B, Jeng E, Kong L, Yovandich JL, et al. IL-15:IL-15 receptor alpha superagonist complex: high-level co-expression in recombinant mammalian cells, purification and characterization. *Cytokine*. 2011;56(3):804-10. Epub 2011/10/25. doi: 10.1016/j.cyto.2011.09.028. PubMed PMID: 22019703; PubMed Central PMCID: PMC3221918.
  20. Romee R, Cooley S, Berrien-Elliott MM, Westervelt P, Verneris MR, Wagner JE, et al. First-in-human phase 1 clinical study of the IL-15 superagonist complex ALT-803 to treat relapse after transplantation. *Blood*. 2018;131(23):2515-27. Epub 2018/02/22. doi: 10.1182/blood-2017-12-823757. PubMed PMID: 29463563; PubMed Central PMCID: PMC5992862 support from Altor BioScience, a Nantworks company, but have no financial benefit from the outcome of this trial. J.O.E., E.K.J., A.R., and H.C.W. are employees of Altor BioScience and declare direct financial conflicts. To manage these conflicts, UMN and WUSM investigators led this trial, were sponsors of the IND, managed all the data in the study, and had final responsibility for the manuscript. The study protocol was an investigator-initiated clinical trial. UMN and WUSM investigators performed the clinical trial including data collection, analysis, and interpretation. Altor BioScience performed ALT-803 and cytokine measurements and immunogenicity testing on coded samples. The remaining correlative assays and all statistical analyses were performed by UMN and WUSM. The remaining authors declare no competing financial interests.
  21. Rhode PR, Egan JO, Xu W, Hong H, Webb GM, Chen X, et al. Comparison of the Superagonist Complex, ALT-803, to IL15 as Cancer Immunotherapeutics in Animal Models. *Cancer immunology research*. 2016;4(1):49-60. Epub 2015/10/30. doi: 10.1158/2326-6066.cir-15-0093-t. PubMed PMID: 26511282; PubMed Central PMCID: PMC4703482.
  22. Webb GM, Li S, Mwakalundwa G, Folkvord JM, Greene JM, Reed JS, et al. The human IL-15 superagonist ALT-803 directs SIV-specific CD8(+) T cells into B-cell follicles. *Blood advances*. 2018;2(2):76-84. Epub 2018/01/25. doi: 10.1182/bloodadvances.2017012971. PubMed PMID: 29365313; PubMed Central PMCID: PMC5787870 Corporation. The remaining authors declare no competing financial interests.

23. Gadhamsetty S, Beltman JB, de Boer RJ. What do mathematical models tell us about killing rates during HIV-1 infection? *Immunology letters*. 2015;168(1):1-6. Epub 2015/08/19. doi: 10.1016/j.imlet.2015.07.009. PubMed PMID: 26279491.
24. Jin X, Bauer DE, Tuttleton SE, Lewin S, Gettie A, Blanchard J, et al. Dramatic rise in plasma viremia after CD8(+) T cell depletion in simian immunodeficiency virus-infected macaques. *The Journal of experimental medicine*. 1999;189(6):991-8. Epub 1999/03/17. doi: 10.1084/jem.189.6.991. PubMed PMID: 10075982; PubMed Central PMCID: PMCPMC2193038.
25. Choi EI, Reimann KA, Letvin NL. In vivo natural killer cell depletion during primary simian immunodeficiency virus infection in rhesus monkeys. *Journal of virology*. 2008;82(13):6758-61. Epub 2008/04/25. doi: 10.1128/jvi.02277-07. PubMed PMID: 18434394; PubMed Central PMCID: PMCPMC2447079.
26. De Boer RJ, Mohri H, Ho DD, Perelson AS. Turnover rates of B cells, T cells, and NK cells in simian immunodeficiency virus-infected and uninfected rhesus macaques. *Journal of immunology (Baltimore, Md : 1950)*. 2003;170(5):2479-87. Epub 2003/02/21. doi: 10.4049/jimmunol.170.5.2479. PubMed PMID: 12594273.
27. Davenport MP, Ribeiro RM, Perelson AS. Kinetics of virus-specific CD8+ T cells and the control of human immunodeficiency virus infection. *Journal of virology*. 2004;78(18):10096-103. Epub 2004/08/28. doi: 10.1128/jvi.78.18.10096-10103.2004. PubMed PMID: 15331742; PubMed Central PMCID: PMCPMC515020.
28. McKay MD, Beckman RJ, Conover WJ. Comparison of Three Methods for Selecting Values of Input Variables in the Analysis of Output from a Computer Code. *Technometrics*. 1979;21(2):239-45. doi: 10.1080/00401706.1979.10489755.
29. Byrd RH, Gilbert JC, Nocedal J. A trust region method based on interior point techniques for nonlinear programming. *Mathematical Programming*. 2000;89(1):149-85. doi: 10.1007/PL00011391. PubMed PMID: NA.
30. Marino S, Hogue IB, Ray CJ, Kirschner DE. A methodology for performing global uncertainty and sensitivity analysis in systems biology. *Journal of theoretical biology*. 2008;254(1):178-96. Epub 2008/06/24. doi: 10.1016/j.jtbi.2008.04.011. PubMed PMID: 18572196; PubMed Central PMCID: PMCPMC2570191.
